# Supplementary material for: Genomic surveillance of SARS-CoV-2 tracks early interstate transmission of P.1 lineage and diversification within P.2 clade in Brazil
Source: PubMed Central journal article supplement (PMC8544873; doi:10.1371/journal.pntd.0009835), 2021-10-13
Supplement: pntd.0009835.s009.pdf [file pntd.0009835.s009.pdf]

We gratefully acknowledge the following Authors from the Originating laboratories responsible for obtaining the specimens, as well as the Submitting laboratories where the genome data were generated and shared via GISAID, on which this research is based.

All Submitters of data may be contacted directly via [www.gisaid.org](http://www.gisaid.org)

Authors are sorted alphabetically.

| Accession ID                                                                                                                                                                                                                                                                                                                                                                                                                                                                                                                                  | Originating Laboratory                                                                                   | Submitting Laboratory                                                                            | Authors                                                                                                                                                                                                                                                                                                                                                                                                                                            |
|-----------------------------------------------------------------------------------------------------------------------------------------------------------------------------------------------------------------------------------------------------------------------------------------------------------------------------------------------------------------------------------------------------------------------------------------------------------------------------------------------------------------------------------------------|----------------------------------------------------------------------------------------------------------|--------------------------------------------------------------------------------------------------|----------------------------------------------------------------------------------------------------------------------------------------------------------------------------------------------------------------------------------------------------------------------------------------------------------------------------------------------------------------------------------------------------------------------------------------------------|
| EPI_ISL_1000668, EPI_ISL_1000670, EPI_ISL_1000671, EPI_ISL_1000673, EPI_ISL_1000675, EPI_ISL_1000677                                                                                                                                                                                                                                                                                                                                                                                                                                          | Instituto de Biotecnologia - UNESP-Botucatu-SP                                                           | Instituto de Biotecnologia - UNESP-Botucatu-SP                                                   | Leila Sabrina Ullmann; Fábio Sossai Possebon, Camila Dantas Malossi, Paula Rahal, Paulo Inacio da Costa, João Pessoa Araújo Jr.                                                                                                                                                                                                                                                                                                                    |
| EPI_ISL_1004233, EPI_ISL_1004234, EPI_ISL_1004235, EPI_ISL_1004236                                                                                                                                                                                                                                                                                                                                                                                                                                                                            | Laboratório de Virologia - Instituto de Medicina Tropical - Universidade de São Paulo                    | Laboratório de Parasitologia Médica - Instituto de Medicina Tropical - Universidade de São Paulo | Camila Malta Romano, Jaqueline Goes de Jesus, Giulia Magalhães Ferreira, Pamela dos Santos Andrade, Esmeria Coelho, Alvina Clara Felix, Anderson de Paula, Darlan Candido, Ingra Moraes Claro, Franciane Mendes, Midia Ferreira, Lucas A. Moyses Franco, Flavia Cristina Sales, Nuno Faria, Ester C. Sabino; Brazil-UK Centre for Arbovirus Discovery Diagnosis Genomics and Epidemiology (CADDE) Genomic Network - Instituto de Medicina Tropical |
| EPI_ISL_1008415                                                                                                                                                                                                                                                                                                                                                                                                                                                                                                                               | Klinisk mikrobiologi                                                                                     | The Public Health Agency of Sweden                                                               | Anna-Malin Linde, Maria Lind Karlberg, Carlo Berg, Oskar Karlsson Lindsjo, Sofia Stamouli, Reza Advani, Mattias Haukland, Petra Holmstrom, Noura Walai, Petra Edquist, Mia Brytting, Anna Risberg, Karin Tegmark-Wisell                                                                                                                                                                                                                            |
| EPI_ISL_1009675, EPI_ISL_1009677, EPI_ISL_1009678                                                                                                                                                                                                                                                                                                                                                                                                                                                                                             | Diagnósticos da América - DASA                                                                           | Instituto de Medicina Tropical de Sao Paulo                                                      | Brazil-UK Centre for Arbovirus Discovery Diagnosis Genomics and Epidemiology (CADDE) Genomic Network - Instituto de Medicina Tropical                                                                                                                                                                                                                                                                                                              |
| EPI_ISL_1014436                                                                                                                                                                                                                                                                                                                                                                                                                                                                                                                               | Dutch COVID-19 response team                                                                             | National Institute for Public Health and the Environment (RIVM)                                  | Adam Meijer, Harry Vennema, Dirk Eggink, Jeroen Cremer, Sharon van den Brink, Bas van der Veer, AnneMarie van den Brandt, Florian Zwagemaker, Dennis Schmitz, Chantal Reusken, on behalf of the national COVID-19 response team                                                                                                                                                                                                                    |
| EPI_ISL_1023783, EPI_ISL_1023784, EPI_ISL_1023786, EPI_ISL_1023788, EPI_ISL_1023790, EPI_ISL_1023792, EPI_ISL_1023794, EPI_ISL_1023796, EPI_ISL_1023798, EPI_ISL_1023800, EPI_ISL_1023801, EPI_ISL_1023803, EPI_ISL_1023805, EPI_ISL_1023807, EPI_ISL_1023809, EPI_ISL_1023811, EPI_ISL_1023812, EPI_ISL_1023815, EPI_ISL_1023816, EPI_ISL_1023818, EPI_ISL_1023820, EPI_ISL_1023822, EPI_ISL_1023824, EPI_ISL_1023826, EPI_ISL_1023827, EPI_ISL_1023835, EPI_ISL_1023837, EPI_ISL_1023839, EPI_ISL_1023841, EPI_ISL_1023843, EPI_ISL_1023845 | Centro de Desenvolvimento Tecnológico em Saúde - CDTS                                                    | Centro de Desenvolvimento Tecnológico em Saúde - CDTS                                            | Souza,T.M., Fintelman-Rodrigues.N., De Paula,A.D., Saraiva,F.B., Ferreira,M.A. and Sacramento,C.Q.                                                                                                                                                                                                                                                                                                                                                 |
| see above                                                                                                                                                                                                                                                                                                                                                                                                                                                                                                                                     | Centro de Desenvolvimento Tecnológico em Saúde - CDTS                                                    | Centro de Desenvolvimento Tecnológico em Saúde - CDTS                                            | Souza,T.M., Fintelman-Rodrigues.N., De Paula,A.D., Saraiva,F.B., Ferreira,M.A. and Sacramento,C.Q.                                                                                                                                                                                                                                                                                                                                                 |
| EPI_ISL_1039692, EPI_ISL_1039694                                                                                                                                                                                                                                                                                                                                                                                                                                                                                                              | LACEN do Estado de Goias                                                                                 | Instituto Adolfo Lutz, Interdisciplinary Procedures Center, Strategic Laboratory                 | Claudio Tavares Sacchi, Claudia Regina Gonçalves, Erica Valessa Ramos Gomes, Karoline Rodrigues Campos                                                                                                                                                                                                                                                                                                                                             |
| EPI_ISL_1039696                                                                                                                                                                                                                                                                                                                                                                                                                                                                                                                               | Instituto Adolfo Lutz - Regional de Presidente Prudente                                                  | Instituto Adolfo Lutz, Interdisciplinary Procedures Center, Strategic Laboratory                 | Claudio Tavares Sacchi, Claudia Regina Gonçalves, Erica Valessa Ramos Gomes, Karoline Rodrigues Campos                                                                                                                                                                                                                                                                                                                                             |
| EPI_ISL_1039697                                                                                                                                                                                                                                                                                                                                                                                                                                                                                                                               | Instituto Adolfo Lutz Central                                                                            | Instituto Adolfo Lutz, Interdisciplinary Procedures Center, Strategic Laboratory                 | Claudio Tavares Sacchi, Claudia Regina Gonçalves, Erica Valessa Ramos Gomes, Karoline Rodrigues Campos                                                                                                                                                                                                                                                                                                                                             |
| EPI_ISL_1039699                                                                                                                                                                                                                                                                                                                                                                                                                                                                                                                               | Instituto Adolfo Lutz - Regional de Taubate                                                              | Instituto Adolfo Lutz, Interdisciplinary Procedures Center, Strategic Laboratory                 | Claudio Tavares Sacchi, Claudia Regina Gonçalves, Erica Valessa Ramos Gomes, Karoline Rodrigues Campos                                                                                                                                                                                                                                                                                                                                             |
| EPI_ISL_1039700, EPI_ISL_1039701                                                                                                                                                                                                                                                                                                                                                                                                                                                                                                              | Instituto Adolfo Lutz Central                                                                            | Instituto Adolfo Lutz, Interdisciplinary Procedures Center, Strategic Laboratory                 | Claudio Tavares Sacchi, Claudia Regina Gonçalves, Erica Valessa Ramos Gomes, Karoline Rodrigues Campos                                                                                                                                                                                                                                                                                                                                             |
| EPI_ISL_1039702                                                                                                                                                                                                                                                                                                                                                                                                                                                                                                                               | Instituto Adolfo Lutz - Regional de Aracatuba                                                            | Instituto Adolfo Lutz, Interdisciplinary Procedures Center, Strategic Laboratory                 | Claudio Tavares Sacchi, Claudia Regina Gonçalves, Erica Valessa Ramos Gomes, Karoline Rodrigues Campos                                                                                                                                                                                                                                                                                                                                             |
| EPI_ISL_1039703                                                                                                                                                                                                                                                                                                                                                                                                                                                                                                                               | Instituto Adolfo Lutz - Regional de Taubate                                                              | Instituto Adolfo Lutz, Interdisciplinary Procedures Center, Strategic Laboratory                 | Claudio Tavares Sacchi, Claudia Regina Gonçalves, Erica Valessa Ramos Gomes, Karoline Rodrigues Campos                                                                                                                                                                                                                                                                                                                                             |
| EPI_ISL_1039705, EPI_ISL_1039706, EPI_ISL_1039707, EPI_ISL_1039708, EPI_ISL_1039709, EPI_ISL_1039710                                                                                                                                                                                                                                                                                                                                                                                                                                          | Instituto Adolfo Lutz Central                                                                            | Instituto Adolfo Lutz, Interdisciplinary Procedures Center, Strategic Laboratory                 | Claudio Tavares Sacchi, Claudia Regina Gonçalves, Erica Valessa Ramos Gomes, Karoline Rodrigues Campos                                                                                                                                                                                                                                                                                                                                             |
| EPI_ISL_1040823                                                                                                                                                                                                                                                                                                                                                                                                                                                                                                                               | Secretaria Municipal de Saude de Piracacia                                                               | Instituto Adolfo Lutz, Interdisciplinary Procedures Center, Strategic Laboratory                 | Claudio Tavares Sacchi, Claudia Regina Gonçalves, Erica Valessa Ramos Gomes, Karoline Rodrigues Campos                                                                                                                                                                                                                                                                                                                                             |
| EPI_ISL_1040824, EPI_ISL_1040826, EPI_ISL_1040827, EPI_ISL_1040828, EPI_ISL_1040829, EPI_ISL_1040830, EPI_ISL_1040831, EPI_ISL_1040832, EPI_ISL_1040833, EPI_ISL_1040836, EPI_ISL_1040837, EPI_ISL_1040838, EPI_ISL_1040839, EPI_ISL_1040840, EPI_ISL_1040841, EPI_ISL_1040842, EPI_ISL_1040843, EPI_ISL_1040844, EPI_ISL_1040845, EPI_ISL_1040849, EPI_ISL_1040850, EPI_ISL_1040851                                                                                                                                                          | LACEN do Mato Grosso do Sul                                                                              | Instituto Adolfo Lutz, Interdisciplinary Procedures Center, Strategic Laboratory                 | Claudio Tavares Sacchi, Claudia Regina Gonçalves, Erica Valessa Ramos Gomes, Karoline Rodrigues Campos                                                                                                                                                                                                                                                                                                                                             |
| see above                                                                                                                                                                                                                                                                                                                                                                                                                                                                                                                                     | LACEN do Mato Grosso do Sul                                                                              | Instituto Adolfo Lutz, Interdisciplinary Procedures Center, Strategic Laboratory                 | Claudio Tavares Sacchi, Claudia Regina Gonçalves, Erica Valessa Ramos Gomes, Karoline Rodrigues Campos                                                                                                                                                                                                                                                                                                                                             |
| EPI_ISL_1048503                                                                                                                                                                                                                                                                                                                                                                                                                                                                                                                               | National Health Laboratory Service, South Africa                                                         | KRISP, KZn Research Innovation and Sequencing Platform                                           | Giandhari J, Pillay S, Lessells R, Mdlalose K, York D, Khan S, Emmanuel SJ, Tegally H, Wilkinson E, de Oliveira T                                                                                                                                                                                                                                                                                                                                  |
| EPI_ISL_1060877, EPI_ISL_1060880, EPI_ISL_1060882, EPI_ISL_1060883, EPI_ISL_1060885, EPI_ISL_1060888, EPI_ISL_1060889, EPI_ISL_1060890, EPI_ISL_1060892, EPI_ISL_1060893, EPI_ISL_1060894, EPI_ISL_1060895, EPI_ISL_1060896, EPI_ISL_1060897, EPI_ISL_1060898, EPI_ISL_1060899, EPI_ISL_1060901, EPI_ISL_1060903, EPI_ISL_1060905, EPI_ISL_1060906, EPI_ISL_1060908, EPI_ISL_1060909, EPI_ISL_1060911, EPI_ISL_1060915, EPI_ISL_1060916, EPI_ISL_1060917, EPI_ISL_1060919, EPI_ISL_1060921, EPI_ISL_1060922                                   | CDL Laboratorio Santos e Vidal LTDA.                                                                     | Instituto de Medicina Tropical de Sao Paulo                                                      | Brazil-UK Centre for Arbovirus Discovery Diagnosis Genomics and Epidemiology (CADDE) Genomic Network - Instituto de Medicina Tropical                                                                                                                                                                                                                                                                                                              |
| see above                                                                                                                                                                                                                                                                                                                                                                                                                                                                                                                                     | CDL Laboratorio Santos e Vidal LTDA.                                                                     | Instituto de Medicina Tropical de Sao Paulo                                                      | Brazil-UK Centre for Arbovirus Discovery Diagnosis Genomics and Epidemiology (CADDE) Genomic Network - Instituto de Medicina Tropical                                                                                                                                                                                                                                                                                                              |
| EPI_ISL_1060925                                                                                                                                                                                                                                                                                                                                                                                                                                                                                                                               | DB Diagnosticos do Brasil                                                                                | Instituto de Medicina Tropical de Sao Paulo                                                      | Brazil-UK Centre for Arbovirus Discovery Diagnosis Genomics and Epidemiology (CADDE) Genomic Network - Instituto de Medicina Tropical                                                                                                                                                                                                                                                                                                              |
| EPI_ISL_1061031, EPI_ISL_1061032                                                                                                                                                                                                                                                                                                                                                                                                                                                                                                              | CDL Laboratorio Santos e Vidal LTDA.                                                                     | Instituto de Medicina Tropical de Sao Paulo                                                      | Brazil-UK Centre for Arbovirus Discovery Diagnosis Genomics and Epidemiology (CADDE) Genomic Network - Instituto de Medicina Tropical                                                                                                                                                                                                                                                                                                              |
| EPI_ISL_1063789                                                                                                                                                                                                                                                                                                                                                                                                                                                                                                                               | Evandro Chagas Institute                                                                                 | Evandro Chagas Institute Virology                                                                | Santos, M.C.; Silva, A.M.; Junior, W.D.C.; Barbagelata, L.S.; Ferreira, J.A.; Sousa, E.M.A.; da Silva, P.S.; Pinheiro, K.C.; L.C.; Sousa Junior, E.C.                                                                                                                                                                                                                                                                                              |
| EPI_ISL_1064736, EPI_ISL_1064737                                                                                                                                                                                                                                                                                                                                                                                                                                                                                                              | CDL Laboratorio Santos e Vidal LTDA.                                                                     | Instituto de Medicina Tropical de Sao Paulo                                                      | Brazil-UK Centre for Arbovirus Discovery Diagnosis Genomics and Epidemiology (CADDE) Genomic Network - Instituto de Medicina Tropical                                                                                                                                                                                                                                                                                                              |
| EPI_ISL_1065948                                                                                                                                                                                                                                                                                                                                                                                                                                                                                                                               | Department of Virus and Microbiological Special Diagnostics, Statens Serum Institut, Copenhagen, Denmark | Aalborg University                                                                               | Danish Covid-19 Genome Consortium                                                                                                                                                                                                                                                                                                                                                                                                                  |
| EPI_ISL_1067728                                                                                                                                                                                                                                                                                                                                                                                                                                                                                                                               | Center for Biotechnology and Cell Therapy, São Rafael Hospital, Salvador, Brazil                         | Central Public Health Laboratory - LACEN -Bahia, Salvador, Brazil                                | Stephane Tosta, Luciana Oliveira, Vanessa Nardy,Patricia Cajado,Marcela Gómez, Breno Dominguez, Jaqueline Gomes, Vagner Fonseca,Marta Giovanetti,Luiz Alcantara, Felicidade Pereira, Arabela Leal                                                                                                                                                                                                                                                  |
| EPI_ISL_1067729, EPI_ISL_1067730, EPI_ISL_1067731                                                                                                                                                                                                                                                                                                                                                                                                                                                                                             | Central Public Health Laboratory - LACEN -Bahia, Salvador, Brazil                                        | Central Public Health Laboratory - LACEN -Bahia, Salvador, Brazil                                | Stephane Tosta, Luciana Oliveira, Vanessa Nardy,Patricia Cajado,Marcela Gómez, Breno Dominguez, Jaqueline Gomes, Vagner Fonseca,Marta Giovanetti,Luiz Alcantara, Felicidade Pereira, Arabela Leal                                                                                                                                                                                                                                                  |
| EPI_ISL_1067732                                                                                                                                                                                                                                                                                                                                                                                                                                                                                                                               | Center for Biotechnology and Cell Therapy, São Rafael Hospital, Salvador, Brazil                         | Central Public Health Laboratory - LACEN -Bahia, Salvador, Brazil                                | Stephane Tosta, Luciana Oliveira, Vanessa Nardy,Patricia Cajado,Marcela Gómez, Breno Dominguez, Jaqueline Gomes, Vagner Fonseca,Marta Giovanetti,Luiz Alcantara, Felicidade Pereira, Arabela Leal                                                                                                                                                                                                                                                  |
| EPI_ISL_1067733, EPI_ISL_1067734, EPI_ISL_1067735                                                                                                                                                                                                                                                                                                                                                                                                                                                                                             | Central Public Health Laboratory - LACEN -Bahia, Salvador, Brazil                                        | Central Public Health Laboratory - LACEN -Bahia, Salvador, Brazil                                | Stephane Tosta, Luciana Oliveira, Vanessa Nardy,Patricia Cajado,Marcela Gómez, Breno Dominguez, Jaqueline Gomes, Vagner Fonseca,Marta Giovanetti,Luiz Alcantara, Felicidade Pereira, Arabela Leal                                                                                                                                                                                                                                                  |
| EPI_ISL_1067736                                                                                                                                                                                                                                                                                                                                                                                                                                                                                                                               | Center for Biotechnology and Cell Therapy, São Rafael Hospital, Salvador, Brazil                         | Central Public Health Laboratory - LACEN -Bahia, Salvador, Brazil                                | Stephane Tosta, Luciana Oliveira, Vanessa Nardy,Patricia Cajado,Marcela Gómez, Breno Dominguez, Jaqueline Gomes, Vagner Fonseca,Marta Giovanetti,Luiz Alcantara, Felicidade Pereira, Arabela Leal                                                                                                                                                                                                                                                  |
| EPI_ISL_1067737                                                                                                                                                                                                                                                                                                                                                                                                                                                                                                                               | Central Public Health Laboratory - LACEN -Bahia, Salvador, Brazil                                        | Central Public Health Laboratory - LACEN -Bahia, Salvador, Brazil                                | Stephane Tosta, Luciana Oliveira, Vanessa Nardy,Patricia Cajado,Marcela Gómez, Breno Dominguez, Jaqueline Gomes, Vagner Fonseca,Marta Giovanetti,Luiz Alcantara, Felicidade Pereira, Arabela Leal                                                                                                                                                                                                                                                  |

|                                                                                                                                                                                                                                                                                                                                                                                                                                                                                                                                                                                                                                                                                                                                                                                                                                                                                                                                                                                                                                                                                                                                                                                                                                                                                                                                                                                                                                                                                                                                                        |           |                                                                                                                    |                                                                                                                        |                                                                                                                                                                                                                                                                                                                                                                                                                                       |
|--------------------------------------------------------------------------------------------------------------------------------------------------------------------------------------------------------------------------------------------------------------------------------------------------------------------------------------------------------------------------------------------------------------------------------------------------------------------------------------------------------------------------------------------------------------------------------------------------------------------------------------------------------------------------------------------------------------------------------------------------------------------------------------------------------------------------------------------------------------------------------------------------------------------------------------------------------------------------------------------------------------------------------------------------------------------------------------------------------------------------------------------------------------------------------------------------------------------------------------------------------------------------------------------------------------------------------------------------------------------------------------------------------------------------------------------------------------------------------------------------------------------------------------------------------|-----------|--------------------------------------------------------------------------------------------------------------------|------------------------------------------------------------------------------------------------------------------------|---------------------------------------------------------------------------------------------------------------------------------------------------------------------------------------------------------------------------------------------------------------------------------------------------------------------------------------------------------------------------------------------------------------------------------------|
| EPI_ISL_1068078, EPI_ISL_1068079, EPI_ISL_1068083, EPI_ISL_1068084, EPI_ISL_1068086, EPI_ISL_1068091, EPI_ISL_1068092, EPI_ISL_1068093, EPI_ISL_1068094, EPI_ISL_1068096, EPI_ISL_1068097, EPI_ISL_1068098, EPI_ISL_1068099, EPI_ISL_1068100, EPI_ISL_1068102, EPI_ISL_1068107, EPI_ISL_1068115, EPI_ISL_1068116, EPI_ISL_1068120, EPI_ISL_1068121, EPI_ISL_1068122, EPI_ISL_1068123, EPI_ISL_1068124, EPI_ISL_1068127, EPI_ISL_1068130, EPI_ISL_1068131, EPI_ISL_1068132, EPI_ISL_1068135, EPI_ISL_1068137, EPI_ISL_1068139, EPI_ISL_1068140, EPI_ISL_1068141, EPI_ISL_1068143, EPI_ISL_1068145, EPI_ISL_1068148, EPI_ISL_1068152, EPI_ISL_1068153, EPI_ISL_1068155, EPI_ISL_1068161, EPI_ISL_1068162, EPI_ISL_1068163, EPI_ISL_1068166, EPI_ISL_1068167, EPI_ISL_1068168, EPI_ISL_1068170, EPI_ISL_1068172, EPI_ISL_1068173, EPI_ISL_1068175, EPI_ISL_1068182, EPI_ISL_1068195, EPI_ISL_1068197, EPI_ISL_1068200, EPI_ISL_1068201, EPI_ISL_1068203, EPI_ISL_1068205, EPI_ISL_1068206, EPI_ISL_1068207, EPI_ISL_1068210, EPI_ISL_1068212, EPI_ISL_1068213, EPI_ISL_1068216, EPI_ISL_1068217, EPI_ISL_1068220, EPI_ISL_1068223, EPI_ISL_1068224, EPI_ISL_1068225, EPI_ISL_1068226, EPI_ISL_1068227, EPI_ISL_1068229, EPI_ISL_1068230, EPI_ISL_1068231, EPI_ISL_1068233, EPI_ISL_1068235, EPI_ISL_1068237, EPI_ISL_1068240, EPI_ISL_1068244, EPI_ISL_1068245, EPI_ISL_1068246, EPI_ISL_1068247, EPI_ISL_1068250, EPI_ISL_1068251, EPI_ISL_1068254, EPI_ISL_1068256, EPI_ISL_1068259, EPI_ISL_1068265, EPI_ISL_1068267, EPI_ISL_1068277, EPI_ISL_1068283 | see above | Laboratório de Ecologia de Doenças Transmissíveis na Amazonia, Instituto Leonidas e Maria Deane - Fiocruz Amazonia | Laboratório de Ecologia de Doenças Transmissíveis na Amazonia, Instituto Leonidas e Maria Deane - Fiocruz Amazonia     | Valdinete Nascimento, Victor Souza, André Corado, Fernanda Nascimento, George Silva, Ágatha Costa, Debora Duarte, Karina Pessoa, Matilde Mejía, Luciana Gonçalves, Maria Júlia Brandão, Michele Jesus, Felipe Naveca                                                                                                                                                                                                                  |
| EPI_ISL_1068351, EPI_ISL_1068361, EPI_ISL_1068363, EPI_ISL_1068365, EPI_ISL_1068368, EPI_ISL_1068371, EPI_ISL_1068372, EPI_ISL_1068373, EPI_ISL_1068374, EPI_ISL_1068377, EPI_ISL_1068378, EPI_ISL_1068379, EPI_ISL_1068380, EPI_ISL_1068382, EPI_ISL_1068383, EPI_ISL_1068388, EPI_ISL_1068390, EPI_ISL_1068391, EPI_ISL_1068393                                                                                                                                                                                                                                                                                                                                                                                                                                                                                                                                                                                                                                                                                                                                                                                                                                                                                                                                                                                                                                                                                                                                                                                                                      | see above | Central Public Health Laboratory - LACEN -Bahia, Salvador, Brazil                                                  | Central Public Health Laboratory - LACEN -Bahia, Salvador, Brazil                                                      | Stephane Tosta, Luciana Oliveira, Vanessa Nardy, Patrícia Cajado, Marcela Gómez, Breno Dominguez, Jaqueline Gomes, Vagner Fonseca, Marta Giovanetti, Luiz Alcantara, Felicidade Pereira, Arabela Leal                                                                                                                                                                                                                                 |
| EPI_ISL_1073272, EPI_ISL_1073479, EPI_ISL_1073490, EPI_ISL_1073502                                                                                                                                                                                                                                                                                                                                                                                                                                                                                                                                                                                                                                                                                                                                                                                                                                                                                                                                                                                                                                                                                                                                                                                                                                                                                                                                                                                                                                                                                     |           | Israel Central Virology laboratory                                                                                 | Israel National Consortium for SARS-CoV-2 sequencing                                                                   | Neta Zuckerman, Efrat Dahan Bucris, Michal Mandelboim, Dana Bar-Ilan, Oran Erster, Tzvia Mann, Omer Murik, David A. Zeevi, Assaf Rokney, Joseph Jaffe, Eva Nachum, Maya Davidovich Cohen, Ephraim Fass, Gal Zizelski Valenci, Mor Rubinstein, Efrat Rorman, Israel Nissan, Efrat Glick-Saar, Omri Nayshool, Gideon Rechavi, Ella Mendelson, Orna Mor                                                                                  |
| EPI_ISL_1079159                                                                                                                                                                                                                                                                                                                                                                                                                                                                                                                                                                                                                                                                                                                                                                                                                                                                                                                                                                                                                                                                                                                                                                                                                                                                                                                                                                                                                                                                                                                                        |           | IAL Regional de Bauru                                                                                              | Instituto Adolfo Lutz, Interdisciplinary Procedures Center, Strategic Laboratory                                       | Claudio Tavares Sacchi, Claudia Regina Gonçalves, Erica Valessa Ramos Gomes, Karoline Rodrigues Campos                                                                                                                                                                                                                                                                                                                                |
| EPI_ISL_1117765, EPI_ISL_1117770                                                                                                                                                                                                                                                                                                                                                                                                                                                                                                                                                                                                                                                                                                                                                                                                                                                                                                                                                                                                                                                                                                                                                                                                                                                                                                                                                                                                                                                                                                                       |           | National Virus Reference Laboratory                                                                                | National Virus Reference Laboratory                                                                                    | Zoe Yandle, Gabriel Gonzalez, Michael Carr, Jonathan Dean, Cillian F De Gascun                                                                                                                                                                                                                                                                                                                                                        |
| EPI_ISL_1121317                                                                                                                                                                                                                                                                                                                                                                                                                                                                                                                                                                                                                                                                                                                                                                                                                                                                                                                                                                                                                                                                                                                                                                                                                                                                                                                                                                                                                                                                                                                                        |           | IAL Regional de Bauru                                                                                              | Instituto Adolfo Lutz, Interdisciplinary Procedures Center, Strategic Laboratory                                       | Claudio Tavares Sacchi, Claudia Regina Gonçalves, Erica Valessa Ramos Gomes, Karoline Rodrigues Campos, Caio Vinicius Dias Lopes                                                                                                                                                                                                                                                                                                      |
| EPI_ISL_1123375                                                                                                                                                                                                                                                                                                                                                                                                                                                                                                                                                                                                                                                                                                                                                                                                                                                                                                                                                                                                                                                                                                                                                                                                                                                                                                                                                                                                                                                                                                                                        |           | IAL Regional de Santos                                                                                             | Instituto Adolfo Lutz, Interdisciplinary Procedures Center, Strategic Laboratory                                       | Claudio Tavares Sacchi, Claudia Regina Gonçalves, Erica Valessa Ramos Gomes, Karoline Rodrigues Campos, Caio Vinicius Dias Lopes                                                                                                                                                                                                                                                                                                      |
| EPI_ISL_402123                                                                                                                                                                                                                                                                                                                                                                                                                                                                                                                                                                                                                                                                                                                                                                                                                                                                                                                                                                                                                                                                                                                                                                                                                                                                                                                                                                                                                                                                                                                                         |           | Institute of Pathogen Biology, Chinese Academy of Medical Sciences & Peking Union Medical College                  | Institute of Pathogen Biology, Chinese Academy of Medical Sciences & Peking Union Medical College                      | Lili Ren, Jianwei Wang, Qi Jin, Zichun Xiang, Zhiqiang Wu, Chao Wu, Yiwei Liu                                                                                                                                                                                                                                                                                                                                                         |
| EPI_ISL_412116                                                                                                                                                                                                                                                                                                                                                                                                                                                                                                                                                                                                                                                                                                                                                                                                                                                                                                                                                                                                                                                                                                                                                                                                                                                                                                                                                                                                                                                                                                                                         |           | Respiratory Virus Unit, Microbiology Services Colindale, Public Health England                                     | Respiratory Virus Unit, Microbiology Services Colindale, Public Health England                                         | Monica Galiano, Shahjahan Miah, Angie Lackenby, Omolola Akinbami, Tiina Talts, Leena Bhaw, Richard Myers, Steven Platt, Kirstin Edwards, Jonathan Hubb, Joanna Ellis, Maria Zambon                                                                                                                                                                                                                                                    |
| EPI_ISL_412964                                                                                                                                                                                                                                                                                                                                                                                                                                                                                                                                                                                                                                                                                                                                                                                                                                                                                                                                                                                                                                                                                                                                                                                                                                                                                                                                                                                                                                                                                                                                         |           | Hospital Israelita Albert Einstein                                                                                 | Instituto Adolfo Lutz Interdisciplinary Procedures Center Strategic Laboratory                                         | Jaqueline Goes de Jesus, Claudio Tavares Sacchi, Daniela Bernardes Borges da Silva, Ingra Morales Claro, Flávia Cristina da Silva Sales, Claudia Regina Gonçalves, Joshua Quick, Maria do Carmo, Sampaio Tavares Timenetsky, Nicholas James Loman, Andrew Rambaut, Ester Cerdeira Sabino, Nuno Rodrigues Faria                                                                                                                        |
| EPI_ISL_413016                                                                                                                                                                                                                                                                                                                                                                                                                                                                                                                                                                                                                                                                                                                                                                                                                                                                                                                                                                                                                                                                                                                                                                                                                                                                                                                                                                                                                                                                                                                                         |           | Hospital Israelita Albert Einstein                                                                                 | Instituto Adolfo Lutz, Interdisciplinary Procedures Center, Strategic Laboratory                                       | Jaqueline Goes de Jesus, Claudio Tavares Sacchi, Fabiana Cristina Pereira dos Santos, Ingra Morales Claro, Flávia Cristina da Silva Sales, Claudia Regina Gonçalves, Joshua Quick, Maria do Carmo Sampaio Tavares Timenetsky, Nicholas James Loman, Andrew Rambaut, Ester Cerdeira Sabino, Nuno Rodrigues Faria                                                                                                                       |
| EPI_ISL_413565                                                                                                                                                                                                                                                                                                                                                                                                                                                                                                                                                                                                                                                                                                                                                                                                                                                                                                                                                                                                                                                                                                                                                                                                                                                                                                                                                                                                                                                                                                                                         |           | Foundation Pamm                                                                                                    | Erasmus Medical Center                                                                                                 | David Nieuwenhuijse, Bas Oude Munnink, Reina Sikkema, Claudia Schapendonk, Irina Chestakova, Anne van der Linden, Mark Pronk, Pascal Lexmond, Corien Swaan, Manon Haverkate, Madelief Mollers, Mart Stein, Sandra Kengne Kamga Mobou, Jeroen van Kampen, Jolanda Voermans, Aura Timen, Corine GeurtsvanKessel, Annemiek van der Eijk, Richard Molenkamp, Marion Koopmans, on behalf of the Dutch national COVID-19 response team.     |
| EPI_ISL_413997                                                                                                                                                                                                                                                                                                                                                                                                                                                                                                                                                                                                                                                                                                                                                                                                                                                                                                                                                                                                                                                                                                                                                                                                                                                                                                                                                                                                                                                                                                                                         |           | Laboratoire de Virologie, HUG                                                                                      | Swiss National Reference Centre for Influenza                                                                          | LAUBSCHER Florian et al.                                                                                                                                                                                                                                                                                                                                                                                                              |
| EPI_ISL_414014                                                                                                                                                                                                                                                                                                                                                                                                                                                                                                                                                                                                                                                                                                                                                                                                                                                                                                                                                                                                                                                                                                                                                                                                                                                                                                                                                                                                                                                                                                                                         |           | Hospital Israelita Albert Einstein                                                                                 | Instituto Adolfo Lutz, Interdisciplinary Procedures Center, Strategic Laboratory                                       | Claudio Tavares Sacchi, Claudia Regina Gonçalves, Katia Correia dos Santos, Carlos Henrique Camargo, Maria do Carmo Sampaio Tavares Timenetsky, Terezinha Maria de Paiva, Ester Cerdeira Sabino                                                                                                                                                                                                                                       |
| EPI_ISL_414497                                                                                                                                                                                                                                                                                                                                                                                                                                                                                                                                                                                                                                                                                                                                                                                                                                                                                                                                                                                                                                                                                                                                                                                                                                                                                                                                                                                                                                                                                                                                         |           | Center of Medical Microbiology, Virology, and Hospital Hygiene, University of Duesseldorf                          | Center of Medical Microbiology, Virology, and Hospital Hygiene, University of Duesseldorf                              | Ortwin Adams, Marcel Andree, Alexander Diltthey, Torsten Feldt, Sandra Hauka, Torsten Houwaart, Björn-Erik Jensen, Detlef Kindgen-Milles, Malte Kohns Vasconcelos, Klaus Pfeffer, Tina Senff, Daniel Strelow, Jörg Timm, Andreas Walker, Tobias Wienemann                                                                                                                                                                             |
| EPI_ISL_414629                                                                                                                                                                                                                                                                                                                                                                                                                                                                                                                                                                                                                                                                                                                                                                                                                                                                                                                                                                                                                                                                                                                                                                                                                                                                                                                                                                                                                                                                                                                                         |           | Centre Hospitalier Compiègne Laboratoire de Biologie                                                               | National Reference Center for Viruses of Respiratory Infections, Institut Pasteur, Paris                               | Méline Albert, Marion Barbet, Sylvie Behillili, Méline Bizard, Angela Brisebarre, Flora Donati Vincent Enouf, Maud Vanpeene, Sylvie van der Werf, Raulin Olivia                                                                                                                                                                                                                                                                       |
| EPI_ISL_415105                                                                                                                                                                                                                                                                                                                                                                                                                                                                                                                                                                                                                                                                                                                                                                                                                                                                                                                                                                                                                                                                                                                                                                                                                                                                                                                                                                                                                                                                                                                                         |           | Laboratório Central de Saúde Pública Professor Gonçalves Moniz (LACEN-BA)                                          | Laboratory of Respiratory Viruses and Measles, Oswaldo Cruz Institute, FIOCRUZ                                         | Paola Resende, Allison Fabri, Joilson Xavier, Sunando Roy, Fernando Motta, Aline Mattos, Milene Miranda, Cristiana Garcia, Bráulio Caetano, Maria Ogrzewalska, Jonathan Lopes, Luciana Apolinario, Maria Nóbrega, Marilda Siqueira Fiocruz COVID-19 Genomic Surveillance Network                                                                                                                                                      |
| EPI_ISL_415128                                                                                                                                                                                                                                                                                                                                                                                                                                                                                                                                                                                                                                                                                                                                                                                                                                                                                                                                                                                                                                                                                                                                                                                                                                                                                                                                                                                                                                                                                                                                         |           | Laboratório Central de Saúde Pública do Estado do Espírito Santo (LACEN-ES)                                        | Laboratory of Respiratory Viruses and Measles, Oswaldo Cruz Institute, FIOCRUZ                                         | Paola Resende, Allison Fabri, Joilson Xavier, Sunando Roy, Fernando Motta, Aline Mattos, Milene Miranda, Cristiana Garcia, Bráulio Caetano, Maria Ogrzewalska, Jonathan Lopes, Luciana Apolinario, Maria Nóbrega, Marilda Siqueira on behalf of the Fiocruz COVID-19 Genomic Surveillance Network                                                                                                                                     |
| EPI_ISL_416033, EPI_ISL_416034                                                                                                                                                                                                                                                                                                                                                                                                                                                                                                                                                                                                                                                                                                                                                                                                                                                                                                                                                                                                                                                                                                                                                                                                                                                                                                                                                                                                                                                                                                                         |           | Hospital Israelita Albert Einstein                                                                                 | Instituto Adolfo Lutz, Interdisciplinary Procedures Center, Strategic Laboratory                                       | Claudio Tavares Sacchi, Claudia Regina Gonçalves, Carlos Henrique Camargo, Erica Valessa Ramos Gomes, Fabiana Cristina Pereira dos Santos, Daniela Bernardes Borges da Silva, Simone Guadagnucci Morillo, Adriano Abbud, Adriana Bugno, Maria do Carmo Sampaio Tavares Timenetsky, Terezinha Maria de Paiva                                                                                                                           |
| EPI_ISL_416036                                                                                                                                                                                                                                                                                                                                                                                                                                                                                                                                                                                                                                                                                                                                                                                                                                                                                                                                                                                                                                                                                                                                                                                                                                                                                                                                                                                                                                                                                                                                         |           | National Influenza Center - Instituto Adolfo Lutz                                                                  | Instituto Adolfo Lutz, Interdisciplinary Procedures Center, Strategic Laboratory                                       | Claudio Tavares Sacchi, Claudia Regina Gonçalves, Carlos Henrique Camargo, Erica Valessa Ramos Gomes, Fabiana Cristina Pereira dos Santos, Daniela Bernardes Borges da Silva, Simone Guadagnucci Morillo, Adriano Abbud, Adriana Bugno, Maria do Carmo Sampaio Tavares Timenetsky, Terezinha Maria de Paiva                                                                                                                           |
| EPI_ISL_416140                                                                                                                                                                                                                                                                                                                                                                                                                                                                                                                                                                                                                                                                                                                                                                                                                                                                                                                                                                                                                                                                                                                                                                                                                                                                                                                                                                                                                                                                                                                                         |           | Department of Virus and Microbiological Special diagnostics, Statens Serum Institut, Copenhagen, Denmark.          | Statens Serum Institute                                                                                                | Morten Rasmussen, Maiken Worsoe Rosenstjerne, Anders Fomsgaard                                                                                                                                                                                                                                                                                                                                                                        |
| EPI_ISL_417215                                                                                                                                                                                                                                                                                                                                                                                                                                                                                                                                                                                                                                                                                                                                                                                                                                                                                                                                                                                                                                                                                                                                                                                                                                                                                                                                                                                                                                                                                                                                         |           | Respiratory Virus Unit, Microbiology Services Colindale, Public Health England                                     | Respiratory Virus Unit, Microbiology Services Colindale, Public Health England                                         | Monica Galiano, Shahjahan Miah, Angie Lackenby, Omolola Akinbami, Tiina Talts, Leena Bhaw, Richard Myers, Steven Platt, Kirstin Edwards, Jonathan Hubb, Joanna Ellis, Maria Zambon                                                                                                                                                                                                                                                    |
| EPI_ISL_421004                                                                                                                                                                                                                                                                                                                                                                                                                                                                                                                                                                                                                                                                                                                                                                                                                                                                                                                                                                                                                                                                                                                                                                                                                                                                                                                                                                                                                                                                                                                                         |           | Wales Specialist Virology Centre                                                                                   | Public Health Wales Microbiology Cardiff                                                                               | Catherine Moore, Joanne Watkins, Sally Corden, Malorie Perry, Simon Cottrell Sara Rey, Matt Bull, Tom Connor                                                                                                                                                                                                                                                                                                                          |
| EPI_ISL_421354                                                                                                                                                                                                                                                                                                                                                                                                                                                                                                                                                                                                                                                                                                                                                                                                                                                                                                                                                                                                                                                                                                                                                                                                                                                                                                                                                                                                                                                                                                                                         |           | MSHS Clinical Microbiology Laboratories                                                                            | MSHS Pathogen Surveillance Program                                                                                     | Ana S. Gonzalez-Reiche, Mitchell Sullivan, Ajay Obla, Gopi Patel, Emilia Sordillo, Melissa Gitman, Alberto Paniz-mondolfi, Matthew Hernandez, Shclcie Fabre, Jose Polanco, Zenab Khan, Bremy Albuquerque, Jayeeta Dutta, Juan Soto, Shwetha Sridhar Hara, Ying-Chih Wang, Melissa Smith, Robert Sebra, Lisa Miorin, Wen-chun Liu, Randy Albrecht, Judith Aberg, Florian Krammer, Adolfo Garcia-Sarstre, Viviana Simon, Harm van Bakel |
| EPI_ISL_421807                                                                                                                                                                                                                                                                                                                                                                                                                                                                                                                                                                                                                                                                                                                                                                                                                                                                                                                                                                                                                                                                                                                                                                                                                                                                                                                                                                                                                                                                                                                                         |           | Respiratory Virus Unit, Microbiology Services Colindale, Public Health England                                     | Respiratory Virus Unit, Microbiology Services Colindale, Public Health England                                         | Monica Galiano, Shahjahan Miah, Angie Lackenby, Omolola Akinbami, Tiina Talts, Leena Bhaw, Richard Myers, Steven Platt, Kirstin Edwards, Jonathan Hubb, Joanna Ellis, Maria Zambon                                                                                                                                                                                                                                                    |
| EPI_ISL_422407                                                                                                                                                                                                                                                                                                                                                                                                                                                                                                                                                                                                                                                                                                                                                                                                                                                                                                                                                                                                                                                                                                                                                                                                                                                                                                                                                                                                                                                                                                                                         |           | Department of Laboratory Medicine, National Taiwan University Hospital                                             | Microbial Genomics Core Lab, National Taiwan University Centers of Genomic and Precision Medicine                      | Shiou-Hwei Yeh, You-Yu Lin, Ya-Yun Lai, Chiao-Ling Li, Shan-Chwen Chang, Pei-Jer Chen, Sui-Yuan Chang                                                                                                                                                                                                                                                                                                                                 |
| EPI_ISL_424850                                                                                                                                                                                                                                                                                                                                                                                                                                                                                                                                                                                                                                                                                                                                                                                                                                                                                                                                                                                                                                                                                                                                                                                                                                                                                                                                                                                                                                                                                                                                         |           | IL Department of Public Health Chicago Laboratory                                                                  | Pathogen Discovery, Respiratory Viruses Branch, Division of Viral Diseases, Centers for Disease Control and Prevention | Yan Li, Krista Queen, Clinton R. Paden, Rachel Marine, Anna Uehara, Ying Tao, Jing Zhang, Haibin Wang, Mary S. Keckler, Alison S. Laufer Halpin, Christopher A. Elkins, Suxiang Tong                                                                                                                                                                                                                                                  |
| EPI_ISL_425684                                                                                                                                                                                                                                                                                                                                                                                                                                                                                                                                                                                                                                                                                                                                                                                                                                                                                                                                                                                                                                                                                                                                                                                                                                                                                                                                                                                                                                                                                                                                         |           | West of Scotland Specialist Virology Centre, NHSGGC / MRC-University of Glasgow Centre for Virus Research          | COVID-19 Genomics UK (COG-UK) Consortium                                                                               | Ana da Silva Filipe, Kathy Smollett, Stephen Carmichael, Natasha Johnson, Daniel Mair, Lily Tong, Jenna Nichols; Sarah McDonald; Richard Orton, Joseph Hughes, Sreenu Vattipally, David L Robertson; Kathy Li, Natasha Jesudason, Rajiv Shah, James Shepherd, Antonia Ho, Emma Thomson; Alasdair MacLean, Rory Gunson.                                                                                                                |
| EPI_ISL_425855                                                                                                                                                                                                                                                                                                                                                                                                                                                                                                                                                                                                                                                                                                                                                                                                                                                                                                                                                                                                                                                                                                                                                                                                                                                                                                                                                                                                                                                                                                                                         |           | Virology Department, Royal Infirmary of Edinburgh, NHS Lothian / School of Biological Sciences, University of      | COVID-19 Genomics UK (COG-UK) Consortium                                                                               | McHugh M, Dewar R, Rooke S, Gallagher M, Balcaza C, O'Toole A, Hill V, McCrone JT, Colqhoun R, Yu X, Jackson B, Scher E, Rambaut A, Williams TC, Templeton K                                                                                                                                                                                                                                                                          |

|                                                                                                                                                                                                                                                                |                                                                                                              |                                                                                                                                                                                               |                                                                                                                                                                                                                                                                                                                                                                                                                                                                                                                                                                  |                                                                                                                                                                                                                                                                                                                                                                                                                                                                    |
|----------------------------------------------------------------------------------------------------------------------------------------------------------------------------------------------------------------------------------------------------------------|--------------------------------------------------------------------------------------------------------------|-----------------------------------------------------------------------------------------------------------------------------------------------------------------------------------------------|------------------------------------------------------------------------------------------------------------------------------------------------------------------------------------------------------------------------------------------------------------------------------------------------------------------------------------------------------------------------------------------------------------------------------------------------------------------------------------------------------------------------------------------------------------------|--------------------------------------------------------------------------------------------------------------------------------------------------------------------------------------------------------------------------------------------------------------------------------------------------------------------------------------------------------------------------------------------------------------------------------------------------------------------|
|                                                                                                                                                                                                                                                                | Edinburgh / Institute of Genetics and Molecular Medicine, University of Edinburgh                            |                                                                                                                                                                                               |                                                                                                                                                                                                                                                                                                                                                                                                                                                                                                                                                                  |                                                                                                                                                                                                                                                                                                                                                                                                                                                                    |
| EPI_ISL_426580                                                                                                                                                                                                                                                 | Instituto Sabin                                                                                              | Laboratory of Virology                                                                                                                                                                        | Fernando L Melo,Gustavo Barra, Ticiane H Santa-Rita, Pedro G Mesquita, Ikaro A Andrade, Tatsuya Nagata, Bergmann M Ribeiro                                                                                                                                                                                                                                                                                                                                                                                                                                       |                                                                                                                                                                                                                                                                                                                                                                                                                                                                    |
| EPI_ISL_427299                                                                                                                                                                                                                                                 | Laboratory of Respiratory Viruses and Measles, Oswaldo Cruz Institute, FIOCRUZ                               | Laboratory of Respiratory Viruses and Measles, Oswaldo Cruz Institute, FIOCRUZ                                                                                                                | Paola Resende, Fernando Motta, Luciana Appolinario, Sunando Roy, Aline Mattos, Milene Miranda, Cristiana Garcia, Braulia Caetano, Maria Ogrzewalska, Priscila Born, Jonathan Lopes, Marilda Siqueira on behalf of the Fiocruz COVID-19 Genomic Surveillance Network                                                                                                                                                                                                                                                                                              |                                                                                                                                                                                                                                                                                                                                                                                                                                                                    |
| EPI_ISL_427305                                                                                                                                                                                                                                                 | Laboratório Central de Saúde Pública do Estado de Santa Catarina (LACEN-SC)                                  | Laboratory of Respiratory Viruses and Measles, Oswaldo Cruz Institute, FIOCRUZ                                                                                                                | Paola Resende, Fernando Motta, Luciana Appolinario, Sunando Roy, Aline Mattos, Milene Miranda, Cristiana Garcia, Braulia Caetano, Maria Ogrzewalska, Priscila Born, Jonathan Lopes, Marilda Siqueira on behalf of the Fiocruz COVID-19 Genomic Surveillance Network                                                                                                                                                                                                                                                                                              |                                                                                                                                                                                                                                                                                                                                                                                                                                                                    |
| EPI_ISL_427591                                                                                                                                                                                                                                                 | NewYork-Presbyterian & Mason Lab                                                                             | Mason Lab                                                                                                                                                                                     | Daniel J. Butler, Christopher Mozsary, Cem Meydan, David Danko, Jonathan Foox, Joel Rosiene, Alon Shaiber, Matthew MacKay, Ebrahim Afshinnekoo, Fritz J. Sedlacek, Nikolay A. Ivanov, Maria Sierra, Craig D. Westover, Krista Ryon, Benjamin Young, Chandrima Bhattacharya, Phyllis Ruggiero, Justyna Gawrys, Iman Hajirasouliha, Dmitry Meleshko, Mirella Salvatore, Dong Xu, Jenny Xiang, John Siple, Lin Cong, Arryn Craney, Priya Velu, Lars F. Westblade, Massimo Loda, Shawn Levy, Melissa Cushing, Marcin Imielinski, Hanna Rennert, Christopher E. Mason |                                                                                                                                                                                                                                                                                                                                                                                                                                                                    |
| EPI_ISL_427674                                                                                                                                                                                                                                                 | Centre for Infectious Diseases and Microbiology Public Health                                                | NSW Health Pathology - Institute of Clinical Pathology and Medical Research; Westmead Hospital; University of Sydney                                                                          | Gall M, Arnott A, Sadsad R, Draper J, Sim E, Bachmann N, Rockett R, Lam C, Gray K, Timms V, Carter I, Holmes EC, O'Sullivan MV, Byun R, Sintchenko V, Chen SC, Eden JS, Maddocks S, Kok J, Propenko M, Sorrell T, Chang S, Basile K, Dwyer DE for the 2019-nCoV Study Group                                                                                                                                                                                                                                                                                      |                                                                                                                                                                                                                                                                                                                                                                                                                                                                    |
| EPI_ISL_429671, EPI_ISL_429674, EPI_ISL_429676, EPI_ISL_429679, EPI_ISL_429684, EPI_ISL_429687, EPI_ISL_429689, EPI_ISL_429695, EPI_ISL_429702                                                                                                                 | Central Public Health Laboratory/Octávio Magalhães Institute (IOM) from the Ezequiel Dias Foundation (FUNED) | Instituto Octávio Magalhães / Fundação Ezequiel Dias (IOM/Funed)                                                                                                                              | Talita Adelino, Joilson Xavier, Marta Giovanetti, Wagner Fonseca, Marcos Vinicius Silva, Luiz Carlos Junior Alcantara, Marluce Aparecida Assunção Oliveira                                                                                                                                                                                                                                                                                                                                                                                                       |                                                                                                                                                                                                                                                                                                                                                                                                                                                                    |
| EPI_ISL_430793                                                                                                                                                                                                                                                 | Laboratorio Análisis Clínicos, Unidad de Servicios Diagnósticos, Swiss Medical Group                         | Área de Secuenciación del Laboratorio de Virología del Hospital de Niños Dr. Ricardo Gutierrez on behalf of Proyecto Argentino Interinstitucional de genómica de SARS-CoV-2 (PAIS Consortium) | Nabaes Jodar, MS; Goya, S; Natale, MI; Lusso, S; Sanchez, O; Guevara, D; Vicario, SM; Mistchenko, AS; Valinotto, LE; Viegas, M.                                                                                                                                                                                                                                                                                                                                                                                                                                  |                                                                                                                                                                                                                                                                                                                                                                                                                                                                    |
| EPI_ISL_431180                                                                                                                                                                                                                                                 | Fujian Center for Disease Control and Prevention                                                             | Fujian Center for Disease Control and Prevention                                                                                                                                              | Lin Qi, Huang Zhimiao, Zhang Yanhua, Weng Yuwei                                                                                                                                                                                                                                                                                                                                                                                                                                                                                                                  |                                                                                                                                                                                                                                                                                                                                                                                                                                                                    |
| EPI_ISL_435145                                                                                                                                                                                                                                                 | Ospedale Civile Giuseppe Mazzini                                                                             | Istituto Zooprofilattico Sperimentale dell'Abruzzo e Molise "G.Caporale"                                                                                                                      | Lorusso A, Marcacci M, Di Domenico M, Ancora M, Curini V, Mangone I, Rinaldi A, Di Pasquale A, Cammà C, Puglia I, Savini G                                                                                                                                                                                                                                                                                                                                                                                                                                       |                                                                                                                                                                                                                                                                                                                                                                                                                                                                    |
| EPI_ISL_451307                                                                                                                                                                                                                                                 | Molecular Virology Unit, Fondazione IRCCS Policlinico San Matteo , Pavia                                     | Laboratory of Virology, INMI Lazzaro Spallanzani IRCCS                                                                                                                                        | Fausto Baldanti, Antonio Piralla, Antonino Di Caro, Cesare E.M. Gruber, Martina Ruca, Barbara Bartolini, Maria R. Capobianchi                                                                                                                                                                                                                                                                                                                                                                                                                                    |                                                                                                                                                                                                                                                                                                                                                                                                                                                                    |
| EPI_ISL_451345                                                                                                                                                                                                                                                 | West China Hospital of Sichuan University                                                                    | State Key Laboratory of Biotherapy of Sichuan University                                                                                                                                      | Baowen Du, Minjin Wang, Chao Tang, Chuan Chen, Yongzhao Zhou, Mingxia Yu, Hancheng Wei, Weimin Li, Jing-wen Lin, Jia Geng, Binwu Ying, Lu Chen                                                                                                                                                                                                                                                                                                                                                                                                                   |                                                                                                                                                                                                                                                                                                                                                                                                                                                                    |
| EPI_ISL_452211                                                                                                                                                                                                                                                 | NIV Influenza                                                                                                | NIV Influenza                                                                                                                                                                                 | Potdar V                                                                                                                                                                                                                                                                                                                                                                                                                                                                                                                                                         |                                                                                                                                                                                                                                                                                                                                                                                                                                                                    |
| EPI_ISL_454750, EPI_ISL_454766                                                                                                                                                                                                                                 | Dutch COVID-19 response team                                                                                 | National Institute for Public Health and the Environment (RIVM)                                                                                                                               | Adam Meijer, Harry Vennema, Jeroen Cremer, Sharon van den Brink, Pieter Overduin, Florian Zwagemaker, Dennis Schmitz, Chantal Reusken, on behalf of the national COVID-19 response team                                                                                                                                                                                                                                                                                                                                                                          |                                                                                                                                                                                                                                                                                                                                                                                                                                                                    |
| EPI_ISL_456071                                                                                                                                                                                                                                                 | Laboratory of Respiratory Viruses and Measles, Oswaldo Cruz Institute, FIOCRUZ                               | Laboratory of Respiratory Viruses and Measles, Oswaldo Cruz Institute, FIOCRUZ                                                                                                                | Paola Resende, Luciana Appolinario, Fernando Motta, Aline Mattos, Milene Miranda, Cristiana Garcia, Braulia Caetano, Maria Ogrzewalska, Jonathan Lopes, Marilda Siqueira on behalf of the Fiocruz COVID-19 Genomic Surveillance Network                                                                                                                                                                                                                                                                                                                          |                                                                                                                                                                                                                                                                                                                                                                                                                                                                    |
| EPI_ISL_456083                                                                                                                                                                                                                                                 | Laboratório Central de Saúde Pública Noel Nutels (LACEN-RJ)                                                  | Laboratory of Respiratory Viruses and Measles, Oswaldo Cruz Institute, FIOCRUZ                                                                                                                | Paola Resende, Luciana Appolinario, Fernando Motta, Aline Mattos, Milene Miranda, Cristiana Garcia, Braulia Caetano, Maria Ogrzewalska, Jonathan Lopes, Marilda Siqueira on behalf of the Fiocruz COVID-19 Genomic Surveillance Network                                                                                                                                                                                                                                                                                                                          |                                                                                                                                                                                                                                                                                                                                                                                                                                                                    |
| EPI_ISL_456084, EPI_ISL_456090, EPI_ISL_456097, EPI_ISL_456098, EPI_ISL_456103                                                                                                                                                                                 | Laboratory of Respiratory Viruses and Measles, Oswaldo Cruz Institute, FIOCRUZ                               | Laboratory of Respiratory Viruses and Measles, Oswaldo Cruz Institute, FIOCRUZ                                                                                                                | Paola Resende, Luciana Appolinario, Fernando Motta, Aline Mattos, Milene Miranda, Cristiana Garcia, Braulia Caetano, Maria Ogrzewalska, Jonathan Lopes, Marilda Siqueira on behalf of the Fiocruz COVID-19 Genomic Surveillance Network                                                                                                                                                                                                                                                                                                                          |                                                                                                                                                                                                                                                                                                                                                                                                                                                                    |
| EPI_ISL_457796                                                                                                                                                                                                                                                 | Johns Hopkins Hospital Department of Pathology                                                               | Johns Hopkins Hospital Department of Pathology                                                                                                                                                | Peter M. Thielen, Thomas Mehoke, Shirlee Wohl, Srividya Ramakrishnan, Melanie Kirsche, Amanda Emlund, Craig Houser, Kristina Zudock, Oluwaseun Falade-Nwulia, Norah Sadowski, Paul Morris, Mark Hopkins, Yunfan Fan, Nidia Trovao, Victoria Gniazdowski, Michael C. Schatz, Stuart C. Ray, Winston Timp, Heba H. Mostafa                                                                                                                                                                                                                                         |                                                                                                                                                                                                                                                                                                                                                                                                                                                                    |
| EPI_ISL_457985                                                                                                                                                                                                                                                 | Oman-NIC                                                                                                     | Oman-NIC                                                                                                                                                                                      | Samira Al-Marugi, Fahad Zadjali, Amina Al Jardani, Khulood Al-Mammary, Hanan Al-Kindi, Fatma BaAlawi, Hamida AL Barwani, Zeyana AL-Dahmani, Intisar Al-Shukri, Aisha Al-Busaidi, Aisha Al-Amri, Ahlam Al-Amri, Mohammed Al-Tobi, Samiha Al Kharusi, Abdulla Balkhair                                                                                                                                                                                                                                                                                             |                                                                                                                                                                                                                                                                                                                                                                                                                                                                    |
| EPI_ISL_458148, EPI_ISL_458149                                                                                                                                                                                                                                 | Evandro Chagas Institute                                                                                     | Evandro Chagas Institute                                                                                                                                                                      | Santos, M.C.; Silva, A.M.; Junior, W.D.C.; Barbagelata, L.S.; Ferreira, J.A.; Sousa, E.M.A.; da Silva, P.S.; Resque, H.R; Martins, L.C.; Sousa Junior, E.C.;Viana, G.M.R                                                                                                                                                                                                                                                                                                                                                                                         |                                                                                                                                                                                                                                                                                                                                                                                                                                                                    |
| EPI_ISL_460134                                                                                                                                                                                                                                                 | Massachusetts General Hospital                                                                               | Infectious Disease Program, Broad Institute of Harvard and MIT                                                                                                                                | Lemieux,J.E., Siddle,K.J., Shaw,B., Adams,G., Pierce,V., Turbett,S., Anahtar,M., Branda,J., Slater,D., Harris,J., Lin,A.E., Gladden-Young,A., Lagerborg,K., Rudy,M., DeRuff,K., Carter,A., Normandin,E., Bauer,M., Reilly,S., Tomkins-Tinch,C., Loreth,C., Chaluvadi,S., Neumann,A., Cusick,C., Chapman,S.B., Gnirke,A., Flowers,K., Cerrato,F., Birren,B.W., Gallagher,G., Smole,S., Park,D.J., MacInnis,B.L., Ryan,E., LaRocque,R., Rosenberg,E., Sabeti,P.C.                                                                                                  |                                                                                                                                                                                                                                                                                                                                                                                                                                                                    |
| EPI_ISL_463530                                                                                                                                                                                                                                                 | Washington State Department of Health                                                                        | Seattle Flu Study                                                                                                                                                                             | Chu et al                                                                                                                                                                                                                                                                                                                                                                                                                                                                                                                                                        |                                                                                                                                                                                                                                                                                                                                                                                                                                                                    |
| EPI_ISL_464416, EPI_ISL_464745, EPI_ISL_466615                                                                                                                                                                                                                 | Respiratory Virus Unit, Microbiology Services Colindale, Public Health England                               | Respiratory Virus Unit, Microbiology Services Colindale, Public Health England                                                                                                                | PHE Covid Sequencing Team                                                                                                                                                                                                                                                                                                                                                                                                                                                                                                                                        |                                                                                                                                                                                                                                                                                                                                                                                                                                                                    |
| EPI_ISL_467346, EPI_ISL_467349, EPI_ISL_467354, EPI_ISL_467355, EPI_ISL_467356, EPI_ISL_467360, EPI_ISL_467361, EPI_ISL_467365                                                                                                                                 | Laboratory of Respiratory Viruses and Measles, Oswaldo Cruz Institute, FIOCRUZ                               | Laboratory of Respiratory Viruses and Measles, Oswaldo Cruz Institute, FIOCRUZ                                                                                                                | Paola Resende, Luciana Appolinario, Fernando Motta, Anna Carolina Paixão, Ana Carolina Mendonça, Aline Mattos, Milene Miranda, Cristiana Garcia, Braulia Caetano, Maria Ogrzewalska, Jonathan Lopes, Marilda Siqueira on behalf of the Fiocruz COVID-19 Genomic Surveillance Network                                                                                                                                                                                                                                                                             |                                                                                                                                                                                                                                                                                                                                                                                                                                                                    |
| EPI_ISL_467499                                                                                                                                                                                                                                                 | Molecular Diagnostics Services (MDS)                                                                         | KRISP, KZN Research Innovation and Sequencing Platform                                                                                                                                        | Giandhari J, Pillay S, Lessells R, Chimukangara B, Mdlalose K, York D, Khan S, Tegally H, Wilkinson E, de Oliveira T                                                                                                                                                                                                                                                                                                                                                                                                                                             |                                                                                                                                                                                                                                                                                                                                                                                                                                                                    |
| EPI_ISL_468305                                                                                                                                                                                                                                                 | Centro de Vigilância a Saude de Diadema                                                                      | Instituto Adolfo Lutz, Interdisciplinary Procedures Center, Strategic Laboratory                                                                                                              | Claudio Tavares Sacchi, Claudia Regina Gonçalves, Erica Valessa Ramos Gomes                                                                                                                                                                                                                                                                                                                                                                                                                                                                                      |                                                                                                                                                                                                                                                                                                                                                                                                                                                                    |
| EPI_ISL_468315                                                                                                                                                                                                                                                 | Hospital Municipal do Tatuape Carmino Caricchio                                                              | Instituto Adolfo Lutz, Interdisciplinary Procedures Center, Strategic Laboratory                                                                                                              | Claudio Tavares Sacchi, Claudia Regina Gonçalves, Erica Valessa Ramos Gomes                                                                                                                                                                                                                                                                                                                                                                                                                                                                                      |                                                                                                                                                                                                                                                                                                                                                                                                                                                                    |
| EPI_ISL_468320                                                                                                                                                                                                                                                 | Secretaria Municipal de Saude de Hortolandia                                                                 | Instituto Adolfo Lutz, Interdisciplinary Procedures Center, Strategic Laboratory                                                                                                              | Claudio Tavares Sacchi, Claudia Regina Gonçalves, Erica Valessa Ramos Gomes                                                                                                                                                                                                                                                                                                                                                                                                                                                                                      |                                                                                                                                                                                                                                                                                                                                                                                                                                                                    |
| EPI_ISL_470568, EPI_ISL_470569, EPI_ISL_470571, EPI_ISL_470573, EPI_ISL_470574, EPI_ISL_470575, EPI_ISL_470576, EPI_ISL_470578, EPI_ISL_470579, EPI_ISL_470580, EPI_ISL_470581, EPI_ISL_470582, EPI_ISL_470583, EPI_ISL_470586, EPI_ISL_470587, EPI_ISL_470588 | see above                                                                                                    | Hermes Pardini                                                                                                                                                                                | Bioinformatics Laboratory / LNCC                                                                                                                                                                                                                                                                                                                                                                                                                                                                                                                                 | Alexandra Gerber, Ana Paula Guimarães, Luiz Gonzaga Paula de Almeida, Ronaldo da Silva Francisco Junior, Mariane Talon, Filipe Romero, Átila Duque Rossi, Terezinha Marta Pereira, working group UFRJ, Jaqueline Goes de Jesus, Ingra Morales Claro, Ester Cerdeira Sabino, Nuno Rodrigues Faria, CADDE-group, Laboratorio Hermes Pardini, Laboratorio Simile, working group UFMG, Amilcar Tanuri, Carolina Voloch, Renato Santana Aguiar e Ana Tereza Vasconcelos |
| EPI_ISL_470590, EPI_ISL_470591, EPI_ISL_470594                                                                                                                                                                                                                 | Simile                                                                                                       | Bioinformatics Laboratory / LNCC                                                                                                                                                              | Alexandra Gerber, Ana Paula Guimarães, Luiz Gonzaga Paula de Almeida, Ronaldo da Silva Francisco Junior, Mariane Talon, Filipe Romero, Átila Duque Rossi, Terezinha Marta Pereira, working group UFRJ, Jaqueline Goes de Jesus, Ingra Morales Claro, Ester Cerdeira Sabino, Nuno Rodrigues Faria, CADDE-group, Laboratorio Hermes Pardini, Laboratorio Simile, working group UFMG, Amilcar Tanuri, Carolina Voloch, Renato Santana Aguiar e Ana Tereza Vasconcelos                                                                                               |                                                                                                                                                                                                                                                                                                                                                                                                                                                                    |
| EPI_ISL_470602, EPI_ISL_470603,                                                                                                                                                                                                                                | Hermes Pardini                                                                                               | Bioinformatics Laboratory / LNCC                                                                                                                                                              | Alexandra Gerber, Ana Paula Guimarães, Luiz Gonzaga Paula de Almeida, Ronaldo da Silva Francisco Junior, Mariane Talon, Filipe Romero, Átila Duque                                                                                                                                                                                                                                                                                                                                                                                                               |                                                                                                                                                                                                                                                                                                                                                                                                                                                                    |

|                                                                                                                                                                                                                                                                                                                                                                                                                |           |                                                                                                                                                                                  |                                                                                                                                                                                                                                                                                                                 |                                                                                                                                                                                                                                                                                                                                                                                                                                                                                                                                                                                                                                                                                        |
|----------------------------------------------------------------------------------------------------------------------------------------------------------------------------------------------------------------------------------------------------------------------------------------------------------------------------------------------------------------------------------------------------------------|-----------|----------------------------------------------------------------------------------------------------------------------------------------------------------------------------------|-----------------------------------------------------------------------------------------------------------------------------------------------------------------------------------------------------------------------------------------------------------------------------------------------------------------|----------------------------------------------------------------------------------------------------------------------------------------------------------------------------------------------------------------------------------------------------------------------------------------------------------------------------------------------------------------------------------------------------------------------------------------------------------------------------------------------------------------------------------------------------------------------------------------------------------------------------------------------------------------------------------------|
| EPI_ISL_470604, EPI_ISL_470608, EPI_ISL_470609, EPI_ISL_470613                                                                                                                                                                                                                                                                                                                                                 |           |                                                                                                                                                                                  | Rossi, Terezinha Marta Pereira, working group UFRJ, Jaqueline Goes de Jesus, Ingra Morales Claro, Ester Cerdeira Sabino, Nuno Rodrigues Faria, CADDE-group, Laboratorio Hermes Pardini, Laboratorio Simile, working group UFMG, Amilcar Tanuri, Carolina Voloch, Renato Santana Aguiar e Ana Tereza Vasconcelos |                                                                                                                                                                                                                                                                                                                                                                                                                                                                                                                                                                                                                                                                                        |
| EPI_ISL_470615, EPI_ISL_470616, EPI_ISL_470617, EPI_ISL_470618, EPI_ISL_470620, EPI_ISL_470622, EPI_ISL_470623, EPI_ISL_470624, EPI_ISL_470626, EPI_ISL_470627, EPI_ISL_470628, EPI_ISL_470635, EPI_ISL_470636, EPI_ISL_470639, EPI_ISL_470645, EPI_ISL_470647, EPI_ISL_470648                                                                                                                                 | see above | Laboratorio de Virologia Molecular / UFRJ                                                                                                                                        | Bioinformatics Laboratory / LNCC                                                                                                                                                                                                                                                                                | Alexandra Gerber, Ana Paula Guimarães, Luiz Gonzaga Paula de Almeida, Ronaldo da Silva Francisco Junior, Mariane Talon, Filipe Romero, Átila Duque Rossi, Terezinha Marta Pereira, working group UFRJ, Jaqueline Goes de Jesus, Ingra Morales Claro, Ester Cerdeira Sabino, Nuno Rodrigues Faria, CADDE-group, Laboratorio Hermes Pardini, Laboratorio Simile, working group UFMG, Amilcar Tanuri, Carolina Voloch, Renato Santana Aguiar e Ana Tereza Vasconcelos                                                                                                                                                                                                                     |
| EPI_ISL_470651, EPI_ISL_470652, EPI_ISL_470653, EPI_ISL_470654                                                                                                                                                                                                                                                                                                                                                 |           | Hermes Pardini                                                                                                                                                                   | Bioinformatics Laboratory / LNCC                                                                                                                                                                                                                                                                                | Alexandra Gerber, Ana Paula Guimarães, Luiz Gonzaga Paula de Almeida, Ronaldo da Silva Francisco Junior, Mariane Talon, Filipe Romero, Átila Duque Rossi, Terezinha Marta Pereira, working group UFRJ, Jaqueline Goes de Jesus, Ingra Morales Claro, Ester Cerdeira Sabino, Nuno Rodrigues Faria, CADDE-group, Laboratorio Hermes Pardini, Laboratorio Simile, working group UFMG, Amilcar Tanuri, Carolina Voloch, Renato Santana Aguiar e Ana Tereza Vasconcelos                                                                                                                                                                                                                     |
| EPI_ISL_471539                                                                                                                                                                                                                                                                                                                                                                                                 |           | Hospital Universitario da USP Sao Paulo                                                                                                                                          | Instituto Adolfo Lutz, Interdisciplinary Procedures Center, Strategic Laboratory                                                                                                                                                                                                                                | Claudio Tavares Sacchi, Claudia Regina Gonçalves, Erica Valessa Ramos Gomes                                                                                                                                                                                                                                                                                                                                                                                                                                                                                                                                                                                                            |
| EPI_ISL_471549                                                                                                                                                                                                                                                                                                                                                                                                 |           | Hospital Municipal Carmen Prudente                                                                                                                                               | Instituto Adolfo Lutz, Interdisciplinary Procedures Center, Strategic Laboratory                                                                                                                                                                                                                                | Claudio Tavares Sacchi, Claudia Regina Gonçalves, Erica Valessa Ramos Gomes                                                                                                                                                                                                                                                                                                                                                                                                                                                                                                                                                                                                            |
| EPI_ISL_471551                                                                                                                                                                                                                                                                                                                                                                                                 |           | Hospital Sao Paulo de Ensino da Unifesp                                                                                                                                          | Instituto Adolfo Lutz, Interdisciplinary Procedures Center, Strategic Laboratory                                                                                                                                                                                                                                | Claudio Tavares Sacchi, Claudia Regina Gonçalves, Erica Valessa Ramos Gomes                                                                                                                                                                                                                                                                                                                                                                                                                                                                                                                                                                                                            |
| EPI_ISL_471552                                                                                                                                                                                                                                                                                                                                                                                                 |           | Hospital Sancta Maggiore                                                                                                                                                         | Instituto Adolfo Lutz, Interdisciplinary Procedures Center, Strategic Laboratory                                                                                                                                                                                                                                | Claudio Tavares Sacchi, Claudia Regina Gonçalves, Erica Valessa Ramos Gomes                                                                                                                                                                                                                                                                                                                                                                                                                                                                                                                                                                                                            |
| EPI_ISL_471556                                                                                                                                                                                                                                                                                                                                                                                                 |           | Pronto Socorro Jose Ibrahim                                                                                                                                                      | Instituto Adolfo Lutz, Interdisciplinary Procedures Center, Strategic Laboratory                                                                                                                                                                                                                                | Claudio Tavares Sacchi, Claudia Regina Gonçalves, Erica Valessa Ramos Gomes                                                                                                                                                                                                                                                                                                                                                                                                                                                                                                                                                                                                            |
| EPI_ISL_472006                                                                                                                                                                                                                                                                                                                                                                                                 |           | Liverpool Clinical Laboratories                                                                                                                                                  | COVID-19 Genomics UK (COG-UK) Consortium                                                                                                                                                                                                                                                                        | Sam Haldenby, Anita Lucaci, Steve Paterson, Julian Hiscox, Alistair Darby, M Almsaud, A Alrezaihi, Muhannad Alruwaili, Stuart D Armstrong, Jones Benjamin, Eleanor G Bentley, Anu Chawla, Jordan J Clark, Angela Cowell, Richard Eccles, Isabel Garcia-Dorival, Matthew Gemmill, Alessandro Gerada, PKF Gilmore, Richard Gregory, Ximeng Han, Catherine Hartley, Margaret Hughes, Miren Iturriza-Gomara, James Johnson, L Luu, Jenifer Manson, Charlotte Nelson, Elaine O'Toole, Cassie Olateju, Rebekah Penrice-Randal, Lucille Rainbow, N.P Randle, Trevor Ian Robinson, Parul Sharma, Ghada T Shawli, James P Stewart, Neil Swainston, Caterina Vamos, Joanne Watts, Mark Whitehead |
| EPI_ISL_476156, EPI_ISL_476157, EPI_ISL_476159, EPI_ISL_476161, EPI_ISL_476162, EPI_ISL_476164, EPI_ISL_476167, EPI_ISL_476170                                                                                                                                                                                                                                                                                 |           | Laboratório de Patologia Clínica - UNICAMP                                                                                                                                       | Laboratório de Estudos de Virus Emergentes - UNICAMP                                                                                                                                                                                                                                                            | José Luiz Proença-Modena, Magnun Nueldo Nunes dos Santos, Angelica Schreiber, Julia Forato, Camila Simeoni, Marcilio Jorge Fumagalli, Mariene Ribeiro Amorim, Darlan da Silva Candido, Nuno Rodrigues Faria, Julien Theze, Luiz Gonzaga, Jaqueline Goes Jesus e William Marciel de Souza                                                                                                                                                                                                                                                                                                                                                                                               |
| EPI_ISL_476184, EPI_ISL_476200                                                                                                                                                                                                                                                                                                                                                                                 |           | DB Diagnósticos do Brasil                                                                                                                                                        | Instituto de Medicina Tropical da Universidade de São Paulo                                                                                                                                                                                                                                                     | Samples: Nelson Gaburo Jr; Sequencing: Ingra Morales Claro, Jaqueline Goes de Jesus, Erika Regina Manuli, Flavia Cristina da Silva Sales, Thais de Moura Coletti, Camila Alves Maia da Silva, Mariana Severo Ramundo, Giulia Magalhaes Ferreira, Darlan da Silva Candido, Julien Theze, Nuno Faria, Ester Sabino                                                                                                                                                                                                                                                                                                                                                                       |
| EPI_ISL_476204                                                                                                                                                                                                                                                                                                                                                                                                 |           | Hospital da Clínicas da Faculdade de Medicina da Universidade de São Paulo                                                                                                       | Instituto de Medicina Tropical da Universidade de São Paulo                                                                                                                                                                                                                                                     | Samples: Ingra Morales Claro, Erika Regina Manuli, Cecília Salette Alencar, Carolina S. Lazar, Sílvia F. Costa; Sequencing: Ingra Morales Claro, Jaqueline Goes de Jesus, Erika Regina Manuli, Flavia Cristina da Silva Sales, Thais de Moura Coletti, Camila Alves Maia da Silva, Mariana Severo Ramundo, Giulia Magalhaes Ferreira, Darlan da Silva Candido, Julien Theze, Nuno Faria, Ester Sabino                                                                                                                                                                                                                                                                                  |
| EPI_ISL_476218                                                                                                                                                                                                                                                                                                                                                                                                 |           | DB Diagnósticos do Brasil                                                                                                                                                        | Instituto de Medicina Tropical da Universidade de São Paulo                                                                                                                                                                                                                                                     | Samples: Nelson Gaburo Jr; Sequencing: Ingra Morales Claro, Jaqueline Goes de Jesus, Erika Regina Manuli, Flavia Cristina da Silva Sales, Thais de Moura Coletti, Camila Alves Maia da Silva, Mariana Severo Ramundo, Giulia Magalhaes Ferreira, Darlan da Silva Candido, Julien Theze, Nuno Faria, Ester Sabino                                                                                                                                                                                                                                                                                                                                                                       |
| EPI_ISL_476220, EPI_ISL_476221                                                                                                                                                                                                                                                                                                                                                                                 |           | Laboratory Fleury                                                                                                                                                                | Instituto de Medicina Tropical da Universidade de São Paulo                                                                                                                                                                                                                                                     | Samples: Celso Granato; Sequencing: Ingra Morales Claro, Jaqueline Goes de Jesus, Erika Regina Manuli, Flavia Cristina da Silva Sales, Thais de Moura Coletti, Camila Alves Maia da Silva, Mariana Severo Ramundo, Giulia Magalhaes Ferreira, Darlan da Silva Candido, Julien Theze, Nuno Faria, Ester Sabino                                                                                                                                                                                                                                                                                                                                                                          |
| EPI_ISL_476243, EPI_ISL_476245, EPI_ISL_476246, EPI_ISL_476250, EPI_ISL_476254, EPI_ISL_476256, EPI_ISL_476259, EPI_ISL_476260, EPI_ISL_476266, EPI_ISL_476267, EPI_ISL_476268, EPI_ISL_476274                                                                                                                                                                                                                 | see above | Hospital da Clínicas da Faculdade de Medicina da Universidade de São Paulo                                                                                                       | Instituto de Medicina Tropical da Universidade de São Paulo                                                                                                                                                                                                                                                     | Samples: Ingra Morales Claro, Erika Regina Manuli, Cecília Salette Alencar, Carolina S. Lazar, Sílvia F. Costa; Sequencing: Ingra Morales Claro, Jaqueline Goes de Jesus, Erika Regina Manuli, Flavia Cristina da Silva Sales, Thais de Moura Coletti, Camila Alves Maia da Silva, Mariana Severo Ramundo, Giulia Magalhaes Ferreira, Darlan da Silva Candido, Julien Theze, Nuno Faria, Ester Sabino                                                                                                                                                                                                                                                                                  |
| EPI_ISL_476278, EPI_ISL_476281, EPI_ISL_476282, EPI_ISL_476286, EPI_ISL_476287, EPI_ISL_476288, EPI_ISL_476289, EPI_ISL_476293, EPI_ISL_476296, EPI_ISL_476298, EPI_ISL_476299, EPI_ISL_476303, EPI_ISL_476307, EPI_ISL_476311, EPI_ISL_476312, EPI_ISL_476313, EPI_ISL_476319, EPI_ISL_476320, EPI_ISL_476321, EPI_ISL_476322, EPI_ISL_476330, EPI_ISL_476331, EPI_ISL_476333, EPI_ISL_476335, EPI_ISL_476336 | see above | DB Diagnósticos do Brasil                                                                                                                                                        | Instituto de Medicina Tropical da Universidade de São Paulo                                                                                                                                                                                                                                                     | Samples: Nelson Gaburo Jr; Sequencing: Ingra Morales Claro, Jaqueline Goes de Jesus, Erika Regina Manuli, Flavia Cristina da Silva Sales, Thais de Moura Coletti, Camila Alves Maia da Silva, Mariana Severo Ramundo, Giulia Magalhaes Ferreira, Darlan da Silva Candido, Julien Theze, Nuno Faria, Ester Sabino                                                                                                                                                                                                                                                                                                                                                                       |
| EPI_ISL_476341, EPI_ISL_476346                                                                                                                                                                                                                                                                                                                                                                                 |           | Laboratório de Patologia Clínica - UNICAMP                                                                                                                                       | Laboratório de Estudos de Virus Emergentes - UNICAMP                                                                                                                                                                                                                                                            | José Luiz Proença-Modena, Magnun Nueldo Nunes dos Santos, Angelica Schreiber, Julia Forato, Camila Simeoni, Marcilio Jorge Fumagalli, Mariene Ribeiro Amorim, Darlan da Silva Candido, Nuno Rodrigues Faria, Julien Theze, Luiz Gonzaga, Jaqueline Goes Jesus e William Marciel de Souza                                                                                                                                                                                                                                                                                                                                                                                               |
| EPI_ISL_476350, EPI_ISL_476351, EPI_ISL_476352, EPI_ISL_476359, EPI_ISL_476362, EPI_ISL_476370                                                                                                                                                                                                                                                                                                                 |           | DB Diagnósticos do Brasil                                                                                                                                                        | Instituto de Medicina Tropical da Universidade de São Paulo                                                                                                                                                                                                                                                     | Samples: Nelson Gaburo Jr; Sequencing: Ingra Morales Claro, Jaqueline Goes de Jesus, Erika Regina Manuli, Flavia Cristina da Silva Sales, Thais de Moura Coletti, Camila Alves Maia da Silva, Mariana Severo Ramundo, Giulia Magalhaes Ferreira, Darlan da Silva Candido, Julien Theze, Nuno Faria, Ester Sabino                                                                                                                                                                                                                                                                                                                                                                       |
| EPI_ISL_476373, EPI_ISL_476374, EPI_ISL_476375, EPI_ISL_476376, EPI_ISL_476379, EPI_ISL_476380, EPI_ISL_476384, EPI_ISL_476386                                                                                                                                                                                                                                                                                 |           | Hospital da Clínicas da Faculdade de Medicina da Universidade de São Paulo                                                                                                       | Instituto de Medicina Tropical da Universidade de São Paulo                                                                                                                                                                                                                                                     | Samples: Ingra Morales Claro, Erika Regina Manuli, Cecília Salette Alencar, Carolina S. Lazar, Sílvia F. Costa; Sequencing: Ingra Morales Claro, Jaqueline Goes de Jesus, Erika Regina Manuli, Flavia Cristina da Silva Sales, Thais de Moura Coletti, Camila Alves Maia da Silva, Mariana Severo Ramundo, Giulia Magalhaes Ferreira, Darlan da Silva Candido, Julien Theze, Nuno Faria, Ester Sabino                                                                                                                                                                                                                                                                                  |
| EPI_ISL_476388, EPI_ISL_476389, EPI_ISL_476390, EPI_ISL_476391, EPI_ISL_476395, EPI_ISL_476396, EPI_ISL_476397, EPI_ISL_476398, EPI_ISL_476399, EPI_ISL_476400, EPI_ISL_476408, EPI_ISL_476412, EPI_ISL_476413, EPI_ISL_476414, EPI_ISL_476415, EPI_ISL_476418, EPI_ISL_476419, EPI_ISL_476422                                                                                                                 | see above | Laboratório de Patologia Clínica - UNICAMP                                                                                                                                       | Laboratório de Estudos de Virus Emergentes - UNICAMP                                                                                                                                                                                                                                                            | José Luiz Proença-Modena, Magnun Nueldo Nunes dos Santos, Angelica Schreiber, Julia Forato, Camila Simeoni, Marcilio Jorge Fumagalli, Mariene Ribeiro Amorim, Darlan da Silva Candido, Nuno Rodrigues Faria, Julien Theze, Luiz Gonzaga, Jaqueline Goes Jesus e William Marciel de Souza                                                                                                                                                                                                                                                                                                                                                                                               |
| EPI_ISL_476431, EPI_ISL_476432, EPI_ISL_476435, EPI_ISL_476437, EPI_ISL_476443, EPI_ISL_476445, EPI_ISL_476446, EPI_ISL_476447, EPI_ISL_476448, EPI_ISL_476450, EPI_ISL_476452, EPI_ISL_476456, EPI_ISL_476461, EPI_ISL_476462, EPI_ISL_476467, EPI_ISL_476471, EPI_ISL_476472, EPI_ISL_476484, EPI_ISL_476486, EPI_ISL_476487, EPI_ISL_476488, EPI_ISL_476489, EPI_ISL_476490                                 | see above | Hospital da Clínicas da Faculdade de Medicina da Universidade de São Paulo                                                                                                       | Instituto de Medicina Tropical da Universidade de São Paulo                                                                                                                                                                                                                                                     | Samples: Ingra Morales Claro, Erika Regina Manuli, Cecília Salette Alencar, Carolina S. Lazar, Sílvia F. Costa; Sequencing: Ingra Morales Claro, Jaqueline Goes de Jesus, Erika Regina Manuli, Flavia Cristina da Silva Sales, Thais de Moura Coletti, Camila Alves Maia da Silva, Mariana Severo Ramundo, Giulia Magalhaes Ferreira, Darlan da Silva Candido, Julien Theze, Nuno Faria, Ester Sabino                                                                                                                                                                                                                                                                                  |
| EPI_ISL_483065                                                                                                                                                                                                                                                                                                                                                                                                 |           | Centro de Desenvolvimento Tecnológico em Saúde, Fundacao Oswaldo Cruz                                                                                                            | Centro de Desenvolvimento Tecnológico em Saúde, Fundacao Oswaldo Cruz                                                                                                                                                                                                                                           | Souza, T.M., Fintelman-Rodrigues, N., De Paula, A.D., Tschoeke, D., Barroso, S.P., Gregorio, M.L., Oliveira, J.S., Saraiva, F.B., Ferreira, M.A., Sacramento, C.Q.                                                                                                                                                                                                                                                                                                                                                                                                                                                                                                                     |
| EPI_ISL_486829                                                                                                                                                                                                                                                                                                                                                                                                 |           | Molecular diagnostic laboratory of Federal Budget Institution of Science "Central Research Institute of Epidemiology" of The Federal Service on Customers' Rights Protection and | Group of Genomics and Postgenomic Technologies of Central Research Institute of Epidemiology                                                                                                                                                                                                                    | Speranskaya AS, Kapteleva VV, Valdokhina AV, Bulanenko VP, Samoilov AE, Korneenko EV, Tivanova EV, Shipulina OY, Akimkin VG                                                                                                                                                                                                                                                                                                                                                                                                                                                                                                                                                            |

| Human Well-being Surveillance                                                                                                                                                                                                                                                                                                                                                                                                                                                                                                                                                  |                                                                                                                                                                                  |                                                                                                                                                    |                                                                                                                                                                                                                                                                                                                                                                                                                                                                                                                                                                     |                                                                                                                                                                                                                                                                                                                                                                                                                                                                                                                                                                                                                                                                                                                                                                                                                                                          |
|--------------------------------------------------------------------------------------------------------------------------------------------------------------------------------------------------------------------------------------------------------------------------------------------------------------------------------------------------------------------------------------------------------------------------------------------------------------------------------------------------------------------------------------------------------------------------------|----------------------------------------------------------------------------------------------------------------------------------------------------------------------------------|----------------------------------------------------------------------------------------------------------------------------------------------------|---------------------------------------------------------------------------------------------------------------------------------------------------------------------------------------------------------------------------------------------------------------------------------------------------------------------------------------------------------------------------------------------------------------------------------------------------------------------------------------------------------------------------------------------------------------------|----------------------------------------------------------------------------------------------------------------------------------------------------------------------------------------------------------------------------------------------------------------------------------------------------------------------------------------------------------------------------------------------------------------------------------------------------------------------------------------------------------------------------------------------------------------------------------------------------------------------------------------------------------------------------------------------------------------------------------------------------------------------------------------------------------------------------------------------------------|
| EPI_ISL_490581                                                                                                                                                                                                                                                                                                                                                                                                                                                                                                                                                                 | Virology Department, Sheffield Teaching Hospitals NHS Foundation Trust/Department of Infection, Immunity and Cardiovascular Disease, The Medical School, University of Sheffield | COVID-19 Genomics UK (COG-UK) Consortium                                                                                                           | Thushan de Silva, Matthew Parker, Nikki Smith, Adri Angyal, Rebecca Brown, Luke Green, Rachel Tucker, Paul Parsons, Danielle Groves, Katie Johnson, Laura Carrilero, Alex Keeley, Dave Partridge, Matthew Wyles, Benjamin Lindsey, Mehmet Yavuz, Mohammad Raza, Cariad Evans                                                                                                                                                                                                                                                                                        |                                                                                                                                                                                                                                                                                                                                                                                                                                                                                                                                                                                                                                                                                                                                                                                                                                                          |
| EPI_ISL_491462                                                                                                                                                                                                                                                                                                                                                                                                                                                                                                                                                                 | Laboratorio de Referencia Nacional de Virus Respiratorio. Instituto Nacional de Salud Perú                                                                                       | Laboratorio de Referencia Nacional de Biotecnología y Biología Molecular. Instituto Nacional de Salud Perú                                         | Carlos Padilla Rojas, Karolyn Vega Chozo, Priscila Lope Pari, Omar Caceres Rey, Marco Galarza Perez, Maribel Huaringa Nuñez, Johanna Balbuena Torrez, Henri Bailon Calderon, Nancy Rojas Serrano                                                                                                                                                                                                                                                                                                                                                                    |                                                                                                                                                                                                                                                                                                                                                                                                                                                                                                                                                                                                                                                                                                                                                                                                                                                          |
| EPI_ISL_492039                                                                                                                                                                                                                                                                                                                                                                                                                                                                                                                                                                 | Instituto de Biologia do Exército                                                                                                                                                | Laboratório Metabolismo Macromolecular FirminoTorres de Castro, Instituto de Biofísica Carlos Chagas Filho, Universidade Federal do Rio de Janeiro | Bianca Catarina Azevedo Cabral, Aline Rosa Vianna de Souza, Tatiana LS Nogueira, Nádia Vaez Gonçalves da Cruz, Caleb GM Santos, Marcos Dornelas-Ribeiro, Elizabeth Valentin, Marcio da Costa Cipitelli, Virginia Sara Grancieri do Amaral, Rodrigo Soares de Moura Neto, Clarissa Damaso, Rosane Silva                                                                                                                                                                                                                                                              |                                                                                                                                                                                                                                                                                                                                                                                                                                                                                                                                                                                                                                                                                                                                                                                                                                                          |
| EPI_ISL_492042                                                                                                                                                                                                                                                                                                                                                                                                                                                                                                                                                                 | Instituto de Biologia do Exército                                                                                                                                                | Laboratório Metabolismo Macromolecular FirminoTorres de Castro, Instituto de Biofísica Carlos Chagas Filho, Universidade Federal do Rio de Janeiro | Bianca Catarina Azevedo Cabral, Aline Rosa Vianna de Souza, Nádia Vaez Gonçalves da Cruz, Caleb GM Santos, Marcos Dornelas-Ribeiro, Tatiana LS Nogueira, Elizabeth Valentin, Marcio da Costa Cipitelli, Virginia Sara Grancieri do Amaral, Rodrigo Soares de Moura Neto, Clarissa Damaso, Rosane Silva                                                                                                                                                                                                                                                              |                                                                                                                                                                                                                                                                                                                                                                                                                                                                                                                                                                                                                                                                                                                                                                                                                                                          |
| EPI_ISL_492043                                                                                                                                                                                                                                                                                                                                                                                                                                                                                                                                                                 | Instituto de Biologia do Exército                                                                                                                                                | Laboratório Metabolismo Macromolecular FirminoTorres de Castro, Instituto de Biofísica Carlos Chagas Filho, Universidade Federal do Rio de Janeiro | Bianca Catarina Azevedo Cabral, Aline Rosa Vianna de Souza, Tatiana LS Nogueira, Nádia Vaez Gonçalves da Cruz, Caleb GM Santos, Marcos Dornelas-Ribeiro, Elizabeth Valentin, Marcio da Costa Cipitelli, Virginia Sara Grancieri do Amaral, Rodrigo Soares de Moura Neto, Clarissa Damaso, Rosane Silva                                                                                                                                                                                                                                                              |                                                                                                                                                                                                                                                                                                                                                                                                                                                                                                                                                                                                                                                                                                                                                                                                                                                          |
| EPI_ISL_492045                                                                                                                                                                                                                                                                                                                                                                                                                                                                                                                                                                 | Instituto de Biologia do Exército                                                                                                                                                | Laboratório Metabolismo Macromolecular FirminoTorres de Castro, Instituto de Biofísica Carlos Chagas Filho, Universidade Federal do Rio de Janeiro | Bianca Catarina Azevedo Cabral, Aline Rosa Vianna de Souza, Caleb GM Santos, Marcos Dornelas-Ribeiro, Tatiana LS Nogueira, Nádia Vaez Gonçalves da Cruz, Elizabeth Valentin, Marcio da Costa Cipitelli, Virginia Sara Grancieri do Amaral, Rodrigo Soares de Moura Neto, Clarissa Damaso, Rosane Silva                                                                                                                                                                                                                                                              |                                                                                                                                                                                                                                                                                                                                                                                                                                                                                                                                                                                                                                                                                                                                                                                                                                                          |
| EPI_ISL_492046                                                                                                                                                                                                                                                                                                                                                                                                                                                                                                                                                                 | Instituto de Biologia do Exército                                                                                                                                                | Laboratório Metabolismo Macromolecular FirminoTorres de Castro, Instituto de Biofísica Carlos Chagas Filho, Universidade Federal do Rio de Janeiro | Bianca Catarina Azevedo Cabral, Aline Rosa Vianna de Souza, Nádia Vaez Gonçalves da Cruz, Caleb GM Santos, Marcos Dornelas-Ribeiro, Tatiana LS Nogueira, Elizabeth Valentin, Marcio da Costa Cipitelli, Virginia Sara Grancieri do Amaral, Rodrigo Soares de Moura Neto, Clarissa Damaso, Rosane Silva                                                                                                                                                                                                                                                              |                                                                                                                                                                                                                                                                                                                                                                                                                                                                                                                                                                                                                                                                                                                                                                                                                                                          |
| EPI_ISL_492047                                                                                                                                                                                                                                                                                                                                                                                                                                                                                                                                                                 | Instituto de Biologia do Exército                                                                                                                                                | Laboratório Metabolismo Macromolecular FirminoTorres de Castro, Instituto de Biofísica Carlos Chagas Filho, Universidade Federal do Rio de Janeiro | Bianca Catarina Azevedo Cabral, Aline Rosa Vianna de Souza, Tatiana LS Nogueira, Nádia Vaez Gonçalves da Cruz, Caleb GM Santos, Marcos Dornelas-Ribeiro, Elizabeth Valentin, Marcio da Costa Cipitelli, Virginia Sara Grancieri do Amaral, Rodrigo Soares de Moura Neto, Clarissa Damaso, Rosane Silva                                                                                                                                                                                                                                                              |                                                                                                                                                                                                                                                                                                                                                                                                                                                                                                                                                                                                                                                                                                                                                                                                                                                          |
| EPI_ISL_500460, EPI_ISL_500461, EPI_ISL_500462, EPI_ISL_500463, EPI_ISL_500464, EPI_ISL_500465, EPI_ISL_500466, EPI_ISL_500467, EPI_ISL_500468, EPI_ISL_500469, EPI_ISL_500470, EPI_ISL_500471, EPI_ISL_500472, EPI_ISL_500473, EPI_ISL_500474, EPI_ISL_500475, EPI_ISL_500476, EPI_ISL_500477, EPI_ISL_500478, EPI_ISL_500480, EPI_ISL_500481, EPI_ISL_500482, EPI_ISL_500483, EPI_ISL_500485, EPI_ISL_500486, EPI_ISL_500865, EPI_ISL_500866, EPI_ISL_500867, EPI_ISL_500868, EPI_ISL_500869, EPI_ISL_500870, EPI_ISL_500871, EPI_ISL_500872, EPI_ISL_500874, EPI_ISL_500875 | see above                                                                                                                                                                        | LACEN/PE                                                                                                                                           | WallauLab, Agegu Magalhaes Institute                                                                                                                                                                                                                                                                                                                                                                                                                                                                                                                                | Marcelo Henrique Santos Paiva, Duschinka Ribeiro Duarte Guedes, Cássia Docena, Matheus Figueira Bezerra, Filipe Zimmer Dezordi, Laís Ceschini Machado, Larissa Krokovsky, Elisama Helvecio, Alexandre Freitas da Silva, Luydson Richardson Silva Vasconcelos, Antonio Mauro Rezende, Severino Jefferson Ribeiro da Silva, Kamila Gaudêncio da Silva Sales, Bruna Santos Lima Figueiredo de Sá, Derciliano Lopes da Cruz, Claudio Eduardo Cavalcanti, Armando de Menezes Neto, Caroline Targino Alves da Silva, Renata Pessôa Germano Mendes, Maria Almerice Lopes da Silva, Tiago Gräf, Paola Cristina Resende, Gonzalo Bello, Michelle da Silva Barros, Wheverton Ricardo Correia do Nascimento, Rodrigo Moraes Loyo Arcoverde, Luciane Caroline Albuquerque Bezerra, Sinval Pinto Brandão Filho, Constância Flávia Junqueira Ayres, Gabriel Luz Wallau |
| EPI_ISL_502779                                                                                                                                                                                                                                                                                                                                                                                                                                                                                                                                                                 |                                                                                                                                                                                  | LACEN/PE                                                                                                                                           | LABBE, Federal University of Pernambuco                                                                                                                                                                                                                                                                                                                                                                                                                                                                                                                             | WILSON JOSE DA SILVA JUNIOR, HEIDI LACERDA ALVES DA CRUZ, MARCOS DA SILVA REGUEIRA NETO, BRUNO SAMPAIO, SERGIO DE SA LEITAO PAIVA JUNIOR, ZILDENE DE SOUSA SILVEIRA, MAIRA GALDINO DA ROCHA PITTA, MICHELLY CRISTINY PEREIRA, MARCOS ANTONIO DE MORAIS JUNIOR, ANTONIO CARLOS DE FREITAS, VALDIR DE QUEIROZ BALBINO.                                                                                                                                                                                                                                                                                                                                                                                                                                                                                                                                     |
| EPI_ISL_502875                                                                                                                                                                                                                                                                                                                                                                                                                                                                                                                                                                 |                                                                                                                                                                                  | LACEN/PE                                                                                                                                           | LABBE, Federal University of Pernambuco                                                                                                                                                                                                                                                                                                                                                                                                                                                                                                                             | WILSON JOSE DA SILVA JUNIOR, HEIDI LACERDA ALVES DA CRUZ, MARCOS DA SILVA REGUEIRA NETO, BRUNO SAMPAIO, SERGIO DE SA LEITAO PAIVA JUNIOR, ZILDENE DE SOUSA SILVEIRA, MAIRA GALDINO DA ROCHA PITTA, MICHELLY CRISTINY PEREIRA, REGINALDO GONCALVES DE LIMA NETO, MARCOS ANTONIO DE MORAIS JUNIOR, ANTONIO CARLOS DE FREITAS, VALDIR DE QUEIROZ BALBINO.                                                                                                                                                                                                                                                                                                                                                                                                                                                                                                   |
| EPI_ISL_510896, EPI_ISL_511479                                                                                                                                                                                                                                                                                                                                                                                                                                                                                                                                                 | Instituto Nacional de Saude (INSA)                                                                                                                                               | Instituto Nacional de Saude (INSA)                                                                                                                 | Borges et al                                                                                                                                                                                                                                                                                                                                                                                                                                                                                                                                                        |                                                                                                                                                                                                                                                                                                                                                                                                                                                                                                                                                                                                                                                                                                                                                                                                                                                          |
| EPI_ISL_513515, EPI_ISL_513516, EPI_ISL_513521, EPI_ISL_513522, EPI_ISL_513524, EPI_ISL_513528, EPI_ISL_513534, EPI_ISL_513539, EPI_ISL_513551, EPI_ISL_513565, EPI_ISL_513568, EPI_ISL_513571, EPI_ISL_513573, EPI_ISL_513574, EPI_ISL_513577, EPI_ISL_513578, EPI_ISL_513579, EPI_ISL_513580, EPI_ISL_513582                                                                                                                                                                                                                                                                 | see above                                                                                                                                                                        | Programa de Oncovirologia, Instituto Nacional de Câncer                                                                                            | Programa de Oncovirologia, Instituto Nacional de Câncer                                                                                                                                                                                                                                                                                                                                                                                                                                                                                                             | Juliana D. Siqueira, Livia R. Goes, Brunna M. Alves, Claudia Cicala, James Arthos, João P.B. Viola, Andreia C. de Melo, Marcelo A. Soares                                                                                                                                                                                                                                                                                                                                                                                                                                                                                                                                                                                                                                                                                                                |
| EPI_ISL_514131                                                                                                                                                                                                                                                                                                                                                                                                                                                                                                                                                                 | Rondônia Central Public Health Laboratory (LACEN/RO), vinctulated to State Health Secretariat of Rondônia (SESAU/RO)                                                             | Molecular Virology Laboratory of Oswaldo Cruz Foundation of Rondônia                                                                               | Luan Felipe Botelho-Souza, Felipe Souza Nogueira-Lima, Tércio Peixoto Roca, Alcione de Oliveira dos Santos, Felipe Gomes Naveca, Adriana Cristina Salvador Maia, Cicileia Correia da Silva, Aline Linhares Ferreira de Melo Mendonça, Celina Aparecida Bertoni Lugtenburg, Camila Flávia Gomes Azzi, Juliana Loca Furtado, Suelen Cavalcante, Rita de Cássia Pontello Rampazzo, Caio Henrique Nemeth Santos, Alice Paula Di Sabatino Guimarães, Jansen Fernandes de Medeiros, Fernando Rodrigues Máximo, Juan Miguel Vilallobos-Salcedo and Deusilene Souza Vieira1 |                                                                                                                                                                                                                                                                                                                                                                                                                                                                                                                                                                                                                                                                                                                                                                                                                                                          |
| EPI_ISL_514134, EPI_ISL_514135, EPI_ISL_514136                                                                                                                                                                                                                                                                                                                                                                                                                                                                                                                                 | Rondônia Central Public Health Laboratory (LACEN/RO), vinctulated to State Health Secretariat of Rondônia (SESAU/RO)                                                             | Molecular Virology Laboratory of Oswaldo Cruz Foundation of Rondônia                                                                               | Luan Felipe Botelho-Souza, Felipe Souza Nogueira-Lima, Tércio Peixoto Roca, Alcione de Oliveira dos Santos, Felipe Gomes Naveca, Adriana Cristina Salvador Maia, Cicileia Correia da Silva, Aline Linhares Ferreira de Melo Mendonça, Celina Aparecida Bertoni Lugtenburg, Camila Flávia Gomes Azzi, Juliana Loca Furtado, Suelen Cavalcante, Rita de Cássia Pontello Rampazzo, Caio Henrique Nemeth Santos, Alice Paula Di Sabatino Guimarães, Jansen Fernandes de Medeiros, Fernando Rodrigues Máximo, Juan Miguel Vilallobos-Salcedo and Deusilene Souza Vieira  |                                                                                                                                                                                                                                                                                                                                                                                                                                                                                                                                                                                                                                                                                                                                                                                                                                                          |
| EPI_ISL_515521                                                                                                                                                                                                                                                                                                                                                                                                                                                                                                                                                                 | Hospital Municipal Dr Waldemar Tebaldi                                                                                                                                           | Instituto Adolfo Lutz, Interdisciplinary Procedures Center, Strategic Laboratory                                                                   | Claudio Tavares Sacchi, Claudia Regina Gonçalves, Erica Valessa Ramos Gomes                                                                                                                                                                                                                                                                                                                                                                                                                                                                                         |                                                                                                                                                                                                                                                                                                                                                                                                                                                                                                                                                                                                                                                                                                                                                                                                                                                          |
| EPI_ISL_515541                                                                                                                                                                                                                                                                                                                                                                                                                                                                                                                                                                 | Hospital Montemagno                                                                                                                                                              | Instituto Adolfo Lutz, Interdisciplinary Procedures Center, Strategic Laboratory                                                                   | Claudio Tavares Sacchi, Claudia Regina Gonçalves, Erica Valessa Ramos Gomes                                                                                                                                                                                                                                                                                                                                                                                                                                                                                         |                                                                                                                                                                                                                                                                                                                                                                                                                                                                                                                                                                                                                                                                                                                                                                                                                                                          |
| EPI_ISL_515546                                                                                                                                                                                                                                                                                                                                                                                                                                                                                                                                                                 | Hospital Municipal do Tatuape Carmino Caricchio                                                                                                                                  | Instituto Adolfo Lutz, Interdisciplinary Procedures Center, Strategic Laboratory                                                                   | Claudio Tavares Sacchi, Claudia Regina Gonçalves, Erica Valessa Ramos Gomes                                                                                                                                                                                                                                                                                                                                                                                                                                                                                         |                                                                                                                                                                                                                                                                                                                                                                                                                                                                                                                                                                                                                                                                                                                                                                                                                                                          |
| EPI_ISL_515547                                                                                                                                                                                                                                                                                                                                                                                                                                                                                                                                                                 | Centro Medico da Policia Militar do Estado de Sao Paulo                                                                                                                          | Instituto Adolfo Lutz, Interdisciplinary Procedures Center, Strategic Laboratory                                                                   | Claudio Tavares Sacchi, Claudia Regina Gonçalves, Erica Valessa Ramos Gomes                                                                                                                                                                                                                                                                                                                                                                                                                                                                                         |                                                                                                                                                                                                                                                                                                                                                                                                                                                                                                                                                                                                                                                                                                                                                                                                                                                          |
| EPI_ISL_515551, EPI_ISL_515552                                                                                                                                                                                                                                                                                                                                                                                                                                                                                                                                                 | Hospital Municipal do Tatuape Carmino Caricchio                                                                                                                                  | Instituto Adolfo Lutz, Interdisciplinary Procedures Center, Strategic Laboratory                                                                   | Claudio Tavares Sacchi, Claudia Regina Gonçalves, Erica Valessa Ramos Gomes                                                                                                                                                                                                                                                                                                                                                                                                                                                                                         |                                                                                                                                                                                                                                                                                                                                                                                                                                                                                                                                                                                                                                                                                                                                                                                                                                                          |
| EPI_ISL_515554                                                                                                                                                                                                                                                                                                                                                                                                                                                                                                                                                                 | Pronto Socorro Municipal de Perus                                                                                                                                                | Instituto Adolfo Lutz, Interdisciplinary Procedures Center, Strategic Laboratory                                                                   | Claudio Tavares Sacchi, Claudia Regina Gonçalves, Erica Valessa Ramos Gomes                                                                                                                                                                                                                                                                                                                                                                                                                                                                                         |                                                                                                                                                                                                                                                                                                                                                                                                                                                                                                                                                                                                                                                                                                                                                                                                                                                          |
| EPI_ISL_515562                                                                                                                                                                                                                                                                                                                                                                                                                                                                                                                                                                 | Hospital Municipal Doutor Alexandre Zaido                                                                                                                                        | Instituto Adolfo Lutz, Interdisciplinary Procedures Center, Strategic Laboratory                                                                   | Claudio Tavares Sacchi, Claudia Regina Gonçalves, Erica Valessa Ramos Gomes                                                                                                                                                                                                                                                                                                                                                                                                                                                                                         |                                                                                                                                                                                                                                                                                                                                                                                                                                                                                                                                                                                                                                                                                                                                                                                                                                                          |
| EPI_ISL_515565                                                                                                                                                                                                                                                                                                                                                                                                                                                                                                                                                                 | Hospital do Servidor Público Estadual Francisco Morato de Oliveira                                                                                                               | Instituto Adolfo Lutz, Interdisciplinary Procedures Center, Strategic Laboratory                                                                   | Claudio Tavares Sacchi, Claudia Regina Gonçalves, Erica Valessa Ramos Gomes                                                                                                                                                                                                                                                                                                                                                                                                                                                                                         |                                                                                                                                                                                                                                                                                                                                                                                                                                                                                                                                                                                                                                                                                                                                                                                                                                                          |
| EPI_ISL_523199                                                                                                                                                                                                                                                                                                                                                                                                                                                                                                                                                                 | Dutch COVID-19 response team                                                                                                                                                     | Erasmus Medical Center                                                                                                                             | Bas Oude Munnink, David Nieuwenhuijse, Reina Sikkema, Claudia Schapendonk, Irina Chestakova, Anne van der Linden, Theo Bestebroer, Stefan van Nieuwkoop, Mark Pronk, Pascal Lexmond, Corien Swaan, Manon Haverkate, Madelief Molers, Mart Stein, Sandra Kengne Kamga Mobou, Jeroen van Kampen, Jolanda Voermans, Aura Timen, Corine GeurtsvanKessel, Annetiek van der Eijk, Richard Molenkamp, Marion Koopmans, on behalf of the Dutch national COVID-19 response team.                                                                                             |                                                                                                                                                                                                                                                                                                                                                                                                                                                                                                                                                                                                                                                                                                                                                                                                                                                          |
| EPI_ISL_523955                                                                                                                                                                                                                                                                                                                                                                                                                                                                                                                                                                 | Hospital Municipal do Tatuape Carmino Caricchio                                                                                                                                  | Instituto Adolfo Lutz, Interdisciplinary Procedures Center, Strategic Laboratory                                                                   | Claudio Tavares Sacchi, Claudia Regina Gonçalves, Erica Valessa Ramos Gomes                                                                                                                                                                                                                                                                                                                                                                                                                                                                                         |                                                                                                                                                                                                                                                                                                                                                                                                                                                                                                                                                                                                                                                                                                                                                                                                                                                          |

|                                                                                |                                                                                                             |                                                                                  |                                                                                                                                                                                                                                                                                                                                                                                          |
|--------------------------------------------------------------------------------|-------------------------------------------------------------------------------------------------------------|----------------------------------------------------------------------------------|------------------------------------------------------------------------------------------------------------------------------------------------------------------------------------------------------------------------------------------------------------------------------------------------------------------------------------------------------------------------------------------|
| EPI_ISL_523956                                                                 | Hospital Regional de Assis                                                                                  | Instituto Adolfo Lutz, Interdisciplinary Procedures Center, Strategic Laboratory | Claudio Tavares Sacchi, Claudia Regina Gonçalves, Erica Valessa Ramos Gomes                                                                                                                                                                                                                                                                                                              |
| EPI_ISL_523957                                                                 | Hospital Itamaraty                                                                                          | Instituto Adolfo Lutz, Interdisciplinary Procedures Center, Strategic Laboratory | Claudio Tavares Sacchi, Claudia Regina Gonçalves, Erica Valessa Ramos Gomes                                                                                                                                                                                                                                                                                                              |
| EPI_ISL_523976                                                                 | Hospital Municipal do Tatuape Carmino Caricchio                                                             | Instituto Adolfo Lutz, Interdisciplinary Procedures Center, Strategic Laboratory | Claudio Tavares Sacchi, Claudia Regina Gonçalves, Erica Valessa Ramos Gomes                                                                                                                                                                                                                                                                                                              |
| EPI_ISL_523977                                                                 | Hosp. Municipal Prof. Dr. Alípio Corrêa Netto                                                               | Instituto Adolfo Lutz, Interdisciplinary Procedures Center, Strategic Laboratory | Claudio Tavares Sacchi, Claudia Regina Gonçalves, Erica Valessa Ramos Gomes                                                                                                                                                                                                                                                                                                              |
| EPI_ISL_523981                                                                 | Hospital Sao Paulo de Ensino da Unifesp                                                                     | Instituto Adolfo Lutz, Interdisciplinary Procedures Center, Strategic Laboratory | Claudio Tavares Sacchi, Claudia Regina Gonçalves, Erica Valessa Ramos Gomes                                                                                                                                                                                                                                                                                                              |
| EPI_ISL_523984, EPI_ISL_523986                                                 | Ama Dr Jose Soares Hungria                                                                                  | Instituto Adolfo Lutz, Interdisciplinary Procedures Center, Strategic Laboratory | Claudio Tavares Sacchi, Claudia Regina Gonçalves, Erica Valessa Ramos Gomes                                                                                                                                                                                                                                                                                                              |
| EPI_ISL_523989                                                                 | AMA Jardim Joamar                                                                                           | Instituto Adolfo Lutz, Interdisciplinary Procedures Center, Strategic Laboratory | Claudio Tavares Sacchi, Claudia Regina Gonçalves, Erica Valessa Ramos Gomes                                                                                                                                                                                                                                                                                                              |
| EPI_ISL_523993                                                                 | UPA Campo Limpo                                                                                             | Instituto Adolfo Lutz, Interdisciplinary Procedures Center, Strategic Laboratory | Claudio Tavares Sacchi, Claudia Regina Gonçalves, Erica Valessa Ramos Gomes                                                                                                                                                                                                                                                                                                              |
| EPI_ISL_524463                                                                 | Hospital Regional de Cotia                                                                                  | Instituto Adolfo Lutz, Interdisciplinary Procedures Center, Strategic Laboratory | Claudio Tavares Sacchi, Claudia Regina Gonçalves, Erica Valessa Ramos Gomes                                                                                                                                                                                                                                                                                                              |
| EPI_ISL_524466                                                                 | PS Municipal Dr Lauro Ribas Braga                                                                           | Instituto Adolfo Lutz, Interdisciplinary Procedures Center, Strategic Laboratory | Claudio Tavares Sacchi, Claudia Regina Gonçalves, Erica Valessa Ramos Gomes                                                                                                                                                                                                                                                                                                              |
| EPI_ISL_524467                                                                 | Hospital Municipal Dr. Moysés Deutsch                                                                       | Instituto Adolfo Lutz, Interdisciplinary Procedures Center, Strategic Laboratory | Claudio Tavares Sacchi, Claudia Regina Gonçalves, Erica Valessa Ramos Gomes                                                                                                                                                                                                                                                                                                              |
| EPI_ISL_524468                                                                 | Hospital Municipal Vereador Jose Storopoli                                                                  | Instituto Adolfo Lutz, Interdisciplinary Procedures Center, Strategic Laboratory | Claudio Tavares Sacchi, Claudia Regina Gonçalves, Erica Valessa Ramos Gomes                                                                                                                                                                                                                                                                                                              |
| EPI_ISL_524469                                                                 | Santa Casa de Misericórdia de Sao Paulo                                                                     | Instituto Adolfo Lutz, Interdisciplinary Procedures Center, Strategic Laboratory | Claudio Tavares Sacchi, Claudia Regina Gonçalves, Erica Valessa Ramos Gomes                                                                                                                                                                                                                                                                                                              |
| EPI_ISL_524784, EPI_ISL_524789, EPI_ISL_524800                                 | Evandro Chagas Institute                                                                                    | Evandro Chagas Institute                                                         | Santos, M.C.; Silva, A.M.; Junior, W.D.C.; Barbagelata, L.S.; Ferreira, J.A.; Sousa, E.M.A.; da Silva, P.S.; Resque, H.R.; Martins, L.C.; Sousa Junior, E.C.; Viana, G.M.R                                                                                                                                                                                                               |
| EPI_ISL_527859                                                                 | Hospital Municipal Vereador Jose Storopoli                                                                  | Instituto Adolfo Lutz, Interdisciplinary Procedures Center, Strategic Laboratory | Claudio Tavares Sacchi, Claudia Regina Gonçalves, Erica Valessa Ramos Gomes                                                                                                                                                                                                                                                                                                              |
| EPI_ISL_527861                                                                 | Hospital e Maternidade Celso Pierro                                                                         | Instituto Adolfo Lutz, Interdisciplinary Procedures Center, Strategic Laboratory | Av. Dr. Arnaldo, 355 - Brazil, Cerqueira Cesar, São Paulo - SP, 01246-1301                                                                                                                                                                                                                                                                                                               |
| EPI_ISL_527864                                                                 | Hospital e Pronto Socorro Comunitário Vila Iolanda                                                          | Instituto Adolfo Lutz, Interdisciplinary Procedures Center, Strategic Laboratory | Claudio Tavares Sacchi, Claudia Regina Gonçalves, Erica Valessa Ramos Gomes                                                                                                                                                                                                                                                                                                              |
| EPI_ISL_527866                                                                 | PS Municipal Dr Lauro Ribas Braga                                                                           | Instituto Adolfo Lutz, Interdisciplinary Procedures Center, Strategic Laboratory | Av. Dr. Arnaldo, 355 - Brazil, Cerqueira Cesar, São Paulo - SP, 01246-1301                                                                                                                                                                                                                                                                                                               |
| EPI_ISL_527868                                                                 | Hospital e Maternidade do Braz                                                                              | Instituto Adolfo Lutz, Interdisciplinary Procedures Center, Strategic Laboratory | Claudio Tavares Sacchi, Claudia Regina Gonçalves, Erica Valessa Ramos Gomes                                                                                                                                                                                                                                                                                                              |
| EPI_ISL_527916                                                                 | University Hospital Basel, Clinical Virology                                                                | University Hospital Basel, Clinical Bacteriology                                 | Madlen Stange, Alfredo Mari, Tim Roloff, Helena MB Seth-Smith, Michael Schweitzer, Myrta Brunner, Karoline Leuzinger, Kirstine K. Soegaard, Alexander Gensch, Sarah Tschudin-Sutter, Simon Fuchs, Julia Bielicki, Hans Pargger, Martin Siegemund, Christian Nickel, Roland Bingisser, Michael Osthoff, Stefano Bassetti, Rita Schneider-Sliwa, Manuel Battegay, Hans Hirsch, Adrian Egli |
| EPI_ISL_534312                                                                 | Distrito Sanitario Sul                                                                                      | Instituto Adolfo Lutz, Interdisciplinary Procedures Center, Strategic Laboratory | Claudio Tavares Sacchi, Claudia Regina Gonçalves, Erica Valessa Ramos Gomes                                                                                                                                                                                                                                                                                                              |
| EPI_ISL_534313                                                                 | Hospital da Sta Casa de Sto Amaro                                                                           | Instituto Adolfo Lutz, Interdisciplinary Procedures Center, Strategic Laboratory | Claudio Tavares Sacchi, Claudia Regina Gonçalves, Erica Valessa Ramos Gomes                                                                                                                                                                                                                                                                                                              |
| EPI_ISL_534317                                                                 | Hospital Geral de Itapevi                                                                                   | Instituto Adolfo Lutz, Interdisciplinary Procedures Center, Strategic Laboratory | Claudio Tavares Sacchi, Claudia Regina Gonçalves, Erica Valessa Ramos Gomes                                                                                                                                                                                                                                                                                                              |
| EPI_ISL_534318                                                                 | Hospital Municipal Antonio Giglio                                                                           | Instituto Adolfo Lutz, Interdisciplinary Procedures Center, Strategic Laboratory | Claudio Tavares Sacchi, Claudia Regina Gonçalves, Erica Valessa Ramos Gomes                                                                                                                                                                                                                                                                                                              |
| EPI_ISL_534322                                                                 | PS Mun Julio Tupy                                                                                           | Instituto Adolfo Lutz, Interdisciplinary Procedures Center, Strategic Laboratory | Claudio Tavares Sacchi, Claudia Regina Gonçalves, Erica Valessa Ramos Gomes                                                                                                                                                                                                                                                                                                              |
| EPI_ISL_534324                                                                 | Hospital Mun Ver Jose Storopoli                                                                             | Instituto Adolfo Lutz, Interdisciplinary Procedures Center, Strategic Laboratory | Claudio Tavares Sacchi, Claudia Regina Gonçalves, Erica Valessa Ramos Gomes                                                                                                                                                                                                                                                                                                              |
| EPI_ISL_534325                                                                 | Unidade de Vigilância em Saúde de Guarulhos                                                                 | Instituto Adolfo Lutz, Interdisciplinary Procedures Center, Strategic Laboratory | Claudio Tavares Sacchi, Claudia Regina Gonçalves, Erica Valessa Ramos Gomes                                                                                                                                                                                                                                                                                                              |
| EPI_ISL_534326                                                                 | Notre Dame Intermedica Saúde AS                                                                             | Instituto Adolfo Lutz, Interdisciplinary Procedures Center, Strategic Laboratory | Claudio Tavares Sacchi, Claudia Regina Gonçalves, Erica Valessa Ramos Gomes                                                                                                                                                                                                                                                                                                              |
| EPI_ISL_536360                                                                 | Hôpital Pierre-Boucher                                                                                      | Laboratoire de santé publique du Québec                                          | Sandrine Moreira, Ioannis Ragoussis, Guillaume Bourque, Jesse Shapiro, Mark Lathrop and Michel Roger                                                                                                                                                                                                                                                                                     |
| EPI_ISL_538017                                                                 | Hospital Universitari i Politècnic La Fe de València                                                        | SeqCOVID-SPAIN consortium/IBV(CSIC)                                              | María Dolores Gómez Ruiz, Eva González Barbera, Ana Gil Brusola, Salvador Giner Almaraz, José Luis López Hontangas and SeqCOVID-SPAIN consortium                                                                                                                                                                                                                                         |
| EPI_ISL_538963                                                                 | Leeds Teaching Hospitals NHS Trust and Public Health England, National Infection Service (Leeds laboratory) | Wellcome Sanger Institute for the COVID-19 Genomics UK (COG-UK) consortium       | Louissa Macfarlane-Smith, Holli Carden, Katherine L. Harper, Antony Hale and Alex Alderton, Roberto Amato, Sonia Goncalves, Ewan Harrison, David K. Jackson, Ian Johnston, Dominic Kwiatkowski, Cordelia Langford, John Sillitoe on behalf of the Wellcome Sanger Institute COVID-19 Surveillance Team                                                                                   |
| EPI_ISL_541340, EPI_ISL_541342, EPI_ISL_541345                                 | Laboratório Central de Saúde Pública do Estado do Paraná (LACEN-PR)                                         | Laboratory of Respiratory Viruses and Measles, Oswaldo Cruz Institute, FIOCRUZ   | Paola Resende, Luciana Appolinario, Fernando Motta, Anna Carolina Paixão, Ana Carolina Mendonça, Jonathan Lopes, Irina Riediger, Maria do Carmo Debur, Marilda Siqueira on behalf of the Fiocruz COVID-19 Genomic Surveillance Network                                                                                                                                                   |
| EPI_ISL_541347, EPI_ISL_541350, EPI_ISL_541351, EPI_ISL_541354, EPI_ISL_541355 | Laboratory of Respiratory Viruses and Measles, Oswaldo Cruz Institute, FIOCRUZ                              | Laboratory of Respiratory Viruses and Measles, Oswaldo Cruz Institute, FIOCRUZ   | Paola Resende, Luciana Appolinario, Fernando Motta, Anna Carolina Paixão, Ana Carolina Mendonça, Jonathan Lopes, Marilda Siqueira on behalf of the Fiocruz COVID-19 Genomic Surveillance Network                                                                                                                                                                                         |
| EPI_ISL_541356, EPI_ISL_541365                                                 | Laboratory of Respiratory Viruses and Measles, Oswaldo Cruz Institute, FIOCRUZ                              | Laboratory of Respiratory Viruses and Measles, Oswaldo Cruz Institute, FIOCRUZ   | Paola Resende, Roxana Loayza, Cinthia Avila, Luciana Appolinario, Fernando Motta, Anna Carolina Paixão, Ana Carolina Mendonça, Marilda Siqueira on behalf of the Fiocruz COVID-19 Genomic Surveillance Network                                                                                                                                                                           |
| EPI_ISL_541367                                                                 | Laboratory of Respiratory Viruses and Measles, Oswaldo Cruz Institute, FIOCRUZ                              | Laboratory of Respiratory Viruses and Measles, Oswaldo Cruz Institute, FIOCRUZ   | Paola Resende, Luciana Appolinario, Fernando Motta, Anna Carolina Paixão, Ana Carolina Mendonça, Jonathan Lopes, Marilda Siqueira on behalf of the Fiocruz COVID-19 Genomic Surveillance Network                                                                                                                                                                                         |

|                                                                                                                                                                                                                                                                                                                                                                                                |                                                                             |                                                                                          |                                                                                                                                                                                                                                                                                                                                                                                                                                                                                                                                                                                                                                                                                                                                                                                                                                                           |
|------------------------------------------------------------------------------------------------------------------------------------------------------------------------------------------------------------------------------------------------------------------------------------------------------------------------------------------------------------------------------------------------|-----------------------------------------------------------------------------|------------------------------------------------------------------------------------------|-----------------------------------------------------------------------------------------------------------------------------------------------------------------------------------------------------------------------------------------------------------------------------------------------------------------------------------------------------------------------------------------------------------------------------------------------------------------------------------------------------------------------------------------------------------------------------------------------------------------------------------------------------------------------------------------------------------------------------------------------------------------------------------------------------------------------------------------------------------|
| EPI_ISL_541370, EPI_ISL_541371                                                                                                                                                                                                                                                                                                                                                                 | Laboratório Central de Saúde Pública do Estado de Santa Catarina (LACEN-SC) | Laboratory of Respiratory Viruses and Measles, Oswaldo Cruz Institute, FIOCRUZ           | Paola Resende, Luciana Appolinario, Fernando Motta, Anna Carolina Paixão, Ana Carolina Mendonça, Jonathan Lopes, Sandra Bianchini, Marilda Siqueira on behalf of the Fiocruz COVID-19 Genomic Surveillance Network                                                                                                                                                                                                                                                                                                                                                                                                                                                                                                                                                                                                                                        |
| EPI_ISL_541373, EPI_ISL_541381, EPI_ISL_541382, EPI_ISL_541388, EPI_ISL_541390, EPI_ISL_541391, EPI_ISL_541392, EPI_ISL_541394                                                                                                                                                                                                                                                                 | Laboratório Central de Saúde Pública do Estado de Sergipe (LACEN-SE)        | Laboratory of Respiratory Viruses and Measles, Oswaldo Cruz Institute, FIOCRUZ           | Paola Resende, Luciana Appolinario, Fernando Motta, Anna Carolina Paixão, Ana Carolina Mendonça, Jonathan Lopes, Clíoma Santos, Marilda Siqueira on behalf of the Fiocruz COVID-19 Genomic Surveillance Network                                                                                                                                                                                                                                                                                                                                                                                                                                                                                                                                                                                                                                           |
| EPI_ISL_541397, EPI_ISL_541399                                                                                                                                                                                                                                                                                                                                                                 | Laboratório de Virologia Comparada e Ambiental - LVCA - IOC                 | Laboratory of Respiratory Viruses and Measles, Oswaldo Cruz Institute, FIOCRUZ           | Paola Resende, Luciana Appolinario, Tulo Machado Fumian, Tatiana Prado, Camille Ferreira Mannarino, Fernando Motta, Ana Carolina Mendonça, Marilda Siqueira, Marize Pereira Miagostovich on behalf of the Fiocruz COVID-19 Genomic Surveillance Network                                                                                                                                                                                                                                                                                                                                                                                                                                                                                                                                                                                                   |
| EPI_ISL_545440                                                                                                                                                                                                                                                                                                                                                                                 | Houston Methodist Hospital                                                  | Houston Methodist Hospital                                                               | S. Wesley Long, Randall J. Olsen, Paul A. Christensen, David W. Bernard, James J. Davis, Maulik Shukla, Marcus Nguyen, Matthew Ojeda Saavedra, Concepcion C. Cantu, Prasanti Yerramilli, Layne Pruitt, Sishir Subedi, Hung-Che Kuo, Heather Hendrickson, Ghazaleh Eskandari, Hoang A. T. Nguyen, J. Hunter Long, Muthiah Kumaraswami, Jule Goike, Daniel Boutz, Jimmy Gollihar, Jason S. McLellan, Chia-Wei Chou, Kamyab Javanmardi, Ilya J. Finkelstein, and James M. Musser                                                                                                                                                                                                                                                                                                                                                                             |
| EPI_ISL_547571                                                                                                                                                                                                                                                                                                                                                                                 | Hospital Municipal Antônio Giglio                                           | Instituto Adolfo Lutz, Interdisciplinary Procedures Center, Strategic Laboratory         | Claudio Tavares Sacchi, Claudia Regina Gonçalves, Erica Valessa Ramos Gomes, Karoline Rodrigues Campos                                                                                                                                                                                                                                                                                                                                                                                                                                                                                                                                                                                                                                                                                                                                                    |
| EPI_ISL_547573                                                                                                                                                                                                                                                                                                                                                                                 | Vigilância em Saúde de Cajamar                                              | Instituto Adolfo Lutz, Interdisciplinary Procedures Center, Strategic Laboratory         | Claudio Tavares Sacchi, Claudia Regina Gonçalves, Erica Valessa Ramos Gomes, Karoline Rodrigues Campos                                                                                                                                                                                                                                                                                                                                                                                                                                                                                                                                                                                                                                                                                                                                                    |
| EPI_ISL_547574                                                                                                                                                                                                                                                                                                                                                                                 | Hospital Universitario da USP                                               | Instituto Adolfo Lutz, Interdisciplinary Procedures Center, Strategic Laboratory         | Claudio Tavares Sacchi, Claudia Regina Gonçalves, Erica Valessa Ramos Gomes, Karoline Rodrigues Campos                                                                                                                                                                                                                                                                                                                                                                                                                                                                                                                                                                                                                                                                                                                                                    |
| EPI_ISL_547575                                                                                                                                                                                                                                                                                                                                                                                 | SVO Jundiá                                                                  | Instituto Adolfo Lutz, Interdisciplinary Procedures Center, Strategic Laboratory         | Claudio Tavares Sacchi, Claudia Regina Gonçalves, Erica Valessa Ramos Gomes, Karoline Rodrigues Campos                                                                                                                                                                                                                                                                                                                                                                                                                                                                                                                                                                                                                                                                                                                                                    |
| EPI_ISL_547576                                                                                                                                                                                                                                                                                                                                                                                 | Secretaria Municipal de Saúde                                               | Instituto Adolfo Lutz, Interdisciplinary Procedures Center, Strategic Laboratory         | Claudio Tavares Sacchi, Claudia Regina Gonçalves, Erica Valessa Ramos Gomes, Karoline Rodrigues Campos                                                                                                                                                                                                                                                                                                                                                                                                                                                                                                                                                                                                                                                                                                                                                    |
| EPI_ISL_547577                                                                                                                                                                                                                                                                                                                                                                                 | Hospital e Maternidade Nossa Senhora das Graças                             | Instituto Adolfo Lutz, Interdisciplinary Procedures Center, Strategic Laboratory         | Claudio Tavares Sacchi, Claudia Regina Gonçalves, Erica Valessa Ramos Gomes, Karoline Rodrigues Campos                                                                                                                                                                                                                                                                                                                                                                                                                                                                                                                                                                                                                                                                                                                                                    |
| EPI_ISL_547578                                                                                                                                                                                                                                                                                                                                                                                 | Hospital Doutor Domingos Leonardo Cerávolo                                  | Instituto Adolfo Lutz, Interdisciplinary Procedures Center, Strategic Laboratory         | Claudio Tavares Sacchi, Claudia Regina Gonçalves, Erica Valessa Ramos Gomes, Karoline Rodrigues Campos                                                                                                                                                                                                                                                                                                                                                                                                                                                                                                                                                                                                                                                                                                                                                    |
| EPI_ISL_547579                                                                                                                                                                                                                                                                                                                                                                                 | Santa Casa de Misericórdia de Araçatuba                                     | Instituto Adolfo Lutz, Interdisciplinary Procedures Center, Strategic Laboratory         | Claudio Tavares Sacchi, Claudia Regina Gonçalves, Erica Valessa Ramos Gomes, Karoline Rodrigues Campos                                                                                                                                                                                                                                                                                                                                                                                                                                                                                                                                                                                                                                                                                                                                                    |
| EPI_ISL_560637                                                                                                                                                                                                                                                                                                                                                                                 | Labo Analyses Med                                                           | National Reference Center for Viruses of Respiratory Infections, Institut Pasteur, Paris | Sylvie Behillil, Fabiana Gambaro, Etienne Simon-Lorière, Vincent Enouf, Maud Vanpeene, Sylvie van der Werf                                                                                                                                                                                                                                                                                                                                                                                                                                                                                                                                                                                                                                                                                                                                                |
| EPI_ISL_572335, EPI_ISL_572336, EPI_ISL_572338, EPI_ISL_572342, EPI_ISL_572351, EPI_ISL_572353, EPI_ISL_572355, EPI_ISL_572358, EPI_ISL_572359, EPI_ISL_572360, EPI_ISL_572361, EPI_ISL_572363, EPI_ISL_572366, EPI_ISL_572367, EPI_ISL_572371, EPI_ISL_572372, EPI_ISL_572375, EPI_ISL_572379, EPI_ISL_572384, EPI_ISL_572385, EPI_ISL_572386, EPI_ISL_572388, EPI_ISL_572394, EPI_ISL_572396 | see above<br>LACEN/PE                                                       | WallauLab, Aggeu Magalhaes Institute                                                     | Marcelo Henrique Santos Paiva, Duschinka Ribeiro Duarte Guedes, Cássia Docena, Matheus Filgueira Bezerra, Filipe Zimmer Dezordi, Laís Ceschini Machado, Larissa Krovovsky, Elisama Helvecio, Alexandre Freitas da Silva, Luydson Richardson Silva Vasconcelos, Antonio Mauro Rezende, Severino Jefferson Ribeiro da Silva, Kamila Gaudêncio da Silva Sales, Bruna Santos Lima Figueiredo de Sá, Dercliano Lopes da Cruz, Claudio Eduardo Cavalcanti, Armando de Menezes Neto, Caroline Targino Alves da Silva, Renata Pessôa Germano Mendes, Maria Almerice Lopes da Silva, Tiago Gráf, Paola Cristina Resende, Gonzalo Belloó, Michelle da Silva Barros, Wheverton Ricardo Correia do Nascimento., Rodrigo Moraes Loyo Arcoverde, Luciane Caroline Albuquerque Bezerra, Sival Pinto Brandão Filho, Constância Flávia Junqueira Ayres, Gabriel Luz Wallau |
| EPI_ISL_574516                                                                                                                                                                                                                                                                                                                                                                                 | National Public Health Laboratory, National Centre for Infectious Diseases  | National Public Health Laboratory, National Centre for Infectious Diseases               | Tze Minn Mak, Sophie Octavia, Zhenyang Zhou, Lin Cui, Raymond Tzer Pin Lin                                                                                                                                                                                                                                                                                                                                                                                                                                                                                                                                                                                                                                                                                                                                                                                |
| EPI_ISL_574578                                                                                                                                                                                                                                                                                                                                                                                 | Hospital Municipal Mário Gatti                                              | Instituto Adolfo Lutz, Interdisciplinary Procedures Center, Strategic Laboratory         | Claudio Tavares Sacchi, Claudia Regina Gonçalves, Erica Valessa Ramos Gomes, Karoline Rodrigues Campos                                                                                                                                                                                                                                                                                                                                                                                                                                                                                                                                                                                                                                                                                                                                                    |
| EPI_ISL_574579                                                                                                                                                                                                                                                                                                                                                                                 | Hospital Municipal Dr. Ignacio Prouença de Gouvea                           | Instituto Adolfo Lutz, Interdisciplinary Procedures Center, Strategic Laboratory         | Claudio Tavares Sacchi, Claudia Regina Gonçalves, Erica Valessa Ramos Gomes, Karoline Rodrigues Campos                                                                                                                                                                                                                                                                                                                                                                                                                                                                                                                                                                                                                                                                                                                                                    |
| EPI_ISL_574580                                                                                                                                                                                                                                                                                                                                                                                 | Hospital Cidade Tiradentes Carmen Prudente                                  | Instituto Adolfo Lutz, Interdisciplinary Procedures Center, Strategic Laboratory         | Claudio Tavares Sacchi, Claudia Regina Gonçalves, Erica Valessa Ramos Gomes, Karoline Rodrigues Campos                                                                                                                                                                                                                                                                                                                                                                                                                                                                                                                                                                                                                                                                                                                                                    |
| EPI_ISL_574583                                                                                                                                                                                                                                                                                                                                                                                 | Secretaria Municipal de Saude de Jandira                                    | Instituto Adolfo Lutz, Interdisciplinary Procedures Center, Strategic Laboratory         | Claudio Tavares Sacchi, Claudia Regina Gonçalves, Erica Valessa Ramos Gomes, Karoline Rodrigues Campos                                                                                                                                                                                                                                                                                                                                                                                                                                                                                                                                                                                                                                                                                                                                                    |
| EPI_ISL_574589                                                                                                                                                                                                                                                                                                                                                                                 | Hospital Municipal Dr. Jose Soares Hungria                                  | Instituto Adolfo Lutz, Interdisciplinary Procedures Center, Strategic Laboratory         | Claudio Tavares Sacchi, Claudia Regina Gonçalves, Erica Valessa Ramos Gomes, Karoline Rodrigues Campos                                                                                                                                                                                                                                                                                                                                                                                                                                                                                                                                                                                                                                                                                                                                                    |
| EPI_ISL_574590                                                                                                                                                                                                                                                                                                                                                                                 | Unidade de Pronto Atendimento UPA I Santa Isabel                            | Instituto Adolfo Lutz, Interdisciplinary Procedures Center, Strategic Laboratory         | Claudio Tavares Sacchi, Claudia Regina Gonçalves, Erica Valessa Ramos Gomes, Karoline Rodrigues Campos                                                                                                                                                                                                                                                                                                                                                                                                                                                                                                                                                                                                                                                                                                                                                    |
| EPI_ISL_574594                                                                                                                                                                                                                                                                                                                                                                                 | Hospital Escola da Universidade de Taubate                                  | Instituto Adolfo Lutz, Interdisciplinary Procedures Center, Strategic Laboratory         | Claudio Tavares Sacchi, Claudia Regina Gonçalves, Erica Valessa Ramos Gomes, Karoline Rodrigues Campos                                                                                                                                                                                                                                                                                                                                                                                                                                                                                                                                                                                                                                                                                                                                                    |
| EPI_ISL_574595                                                                                                                                                                                                                                                                                                                                                                                 | Hospital Geral de Vila Penteadro Dr. Jose Pamgella                          | Instituto Adolfo Lutz, Interdisciplinary Procedures Center, Strategic Laboratory         | Claudio Tavares Sacchi, Claudia Regina Gonçalves, Erica Valessa Ramos Gomes, Karoline Rodrigues Campos                                                                                                                                                                                                                                                                                                                                                                                                                                                                                                                                                                                                                                                                                                                                                    |
| EPI_ISL_574597                                                                                                                                                                                                                                                                                                                                                                                 | Secretaria Municipal de Saude de Jarinu                                     | Instituto Adolfo Lutz, Interdisciplinary Procedures Center, Strategic Laboratory         | Claudio Tavares Sacchi, Claudia Regina Gonçalves, Erica Valessa Ramos Gomes, Karoline Rodrigues Campos                                                                                                                                                                                                                                                                                                                                                                                                                                                                                                                                                                                                                                                                                                                                                    |
| EPI_ISL_574598                                                                                                                                                                                                                                                                                                                                                                                 | Servico de Verificacao de Obito SVO                                         | Instituto Adolfo Lutz, Interdisciplinary Procedures Center, Strategic Laboratory         | Claudio Tavares Sacchi, Claudia Regina Gonçalves, Erica Valessa Ramos Gomes, Karoline Rodrigues Campos                                                                                                                                                                                                                                                                                                                                                                                                                                                                                                                                                                                                                                                                                                                                                    |
| EPI_ISL_579220                                                                                                                                                                                                                                                                                                                                                                                 | Canterbury Health Laboratories                                              | Institute of Environmental Science and Research (ESR)                                    | Xiaoyun Ren, Matt Storey, Nikki Freed, Muhammad Faisal, Jing Wang, Hermes Perez, Anja Werno, Antje van der Linden, Arlo Upton, Chris Mansell, David Hammer, Dragana Drinkovic, Gary McAuliffe, Hana Sofia Andersson, James Ussher, Jill Sherwood, Josh Freeman, Julia Howard, Juliet Ely, Mary DeAlmeida, Matt Blakiston, Matthew Rogers, Max Bloomfield, Michael Addidle, Michelle Balm, Sally Roberts, Sarah Jefferies, Sharmini Muttaiyah, Susan Morpeth, Susan Taylor, Timothy Blackmore, Vani Sathyendran, Veronica Playle, Virginia Hope, Erasmus Smit, Lauren Jelly, Olin Silander, Joep de Ligt                                                                                                                                                                                                                                                   |
| EPI_ISL_583491                                                                                                                                                                                                                                                                                                                                                                                 | Centro de Saude Esf IV Zona Rual Domingos de SJ Rio Pardo                   | Instituto Adolfo Lutz, Interdisciplinary Procedures Center, Strategic Laboratory         | Claudio Tavares Sacchi, Claudia Regina Gonçalves, Erica Valessa Ramos Gomes, Karoline Rodrigues Campos                                                                                                                                                                                                                                                                                                                                                                                                                                                                                                                                                                                                                                                                                                                                                    |
| EPI_ISL_583493                                                                                                                                                                                                                                                                                                                                                                                 | Vigilância em Saúde de Cajamar                                              | Instituto Adolfo Lutz, Interdisciplinary Procedures Center, Strategic Laboratory         | Claudio Tavares Sacchi, Claudia Regina Gonçalves, Erica Valessa Ramos Gomes, Karoline Rodrigues Campos                                                                                                                                                                                                                                                                                                                                                                                                                                                                                                                                                                                                                                                                                                                                                    |
| EPI_ISL_583495                                                                                                                                                                                                                                                                                                                                                                                 | Serviço de Verificação de Óbitos SVO Guarulhos                              | Instituto Adolfo Lutz, Interdisciplinary Procedures Center, Strategic Laboratory         | Claudio Tavares Sacchi, Claudia Regina Gonçalves, Erica Valessa Ramos Gomes, Karoline Rodrigues Campos                                                                                                                                                                                                                                                                                                                                                                                                                                                                                                                                                                                                                                                                                                                                                    |
| EPI_ISL_583497                                                                                                                                                                                                                                                                                                                                                                                 | Complexo Hospitalar Ouro Verde de Campinas                                  | Instituto Adolfo Lutz, Interdisciplinary Procedures Center, Strategic Laboratory         | Claudio Tavares Sacchi, Claudia Regina Gonçalves, Erica Valessa Ramos Gomes, Karoline Rodrigues Campos                                                                                                                                                                                                                                                                                                                                                                                                                                                                                                                                                                                                                                                                                                                                                    |

|                                                                                                                                                                                                                                                                                                                                                                                                                                                                                                                                                                                                                                                                                |                                                                                                                                                            |                                                                                                                                                            |                                                                                                                                                                                                                                                                                                                                    |
|--------------------------------------------------------------------------------------------------------------------------------------------------------------------------------------------------------------------------------------------------------------------------------------------------------------------------------------------------------------------------------------------------------------------------------------------------------------------------------------------------------------------------------------------------------------------------------------------------------------------------------------------------------------------------------|------------------------------------------------------------------------------------------------------------------------------------------------------------|------------------------------------------------------------------------------------------------------------------------------------------------------------|------------------------------------------------------------------------------------------------------------------------------------------------------------------------------------------------------------------------------------------------------------------------------------------------------------------------------------|
| EPI_ISL_583498                                                                                                                                                                                                                                                                                                                                                                                                                                                                                                                                                                                                                                                                 | Hospital Municipal Dr. Waldemar Tebaldi                                                                                                                    | Instituto Adolfo Lutz, Interdisciplinary Procedures Center, Strategic Laboratory                                                                           | Claudio Tavares Sacchi, Claudia Regina Gonçalves, Erica Valessa Ramos Gomes, Karoline Rodrigues Campos                                                                                                                                                                                                                             |
| EPI_ISL_583499                                                                                                                                                                                                                                                                                                                                                                                                                                                                                                                                                                                                                                                                 | Distrito Sanitario Sul Campinas                                                                                                                            | Instituto Adolfo Lutz, Interdisciplinary Procedures Center, Strategic Laboratory                                                                           | Claudio Tavares Sacchi, Claudia Regina Gonçalves, Erica Valessa Ramos Gomes, Karoline Rodrigues Campos                                                                                                                                                                                                                             |
| EPI_ISL_583500                                                                                                                                                                                                                                                                                                                                                                                                                                                                                                                                                                                                                                                                 | Centro de Saude I Tacito Leite de Carvalho e Silva                                                                                                         | Instituto Adolfo Lutz, Interdisciplinary Procedures Center, Strategic Laboratory                                                                           | Claudio Tavares Sacchi, Claudia Regina Gonçalves, Erica Valessa Ramos Gomes, Karoline Rodrigues Campos                                                                                                                                                                                                                             |
| EPI_ISL_583501                                                                                                                                                                                                                                                                                                                                                                                                                                                                                                                                                                                                                                                                 | Hospital Estadual de CampanhaCOVID 19 Barradas                                                                                                             | Instituto Adolfo Lutz, Interdisciplinary Procedures Center, Strategic Laboratory                                                                           | Claudio Tavares Sacchi, Claudia Regina Gonçalves, Erica Valessa Ramos Gomes, Karoline Rodrigues Campos                                                                                                                                                                                                                             |
| EPI_ISL_583502                                                                                                                                                                                                                                                                                                                                                                                                                                                                                                                                                                                                                                                                 | Serv de Vig Sanitaria Epidemio e CTRL de Zoonoses Guaruja                                                                                                  | Instituto Adolfo Lutz, Interdisciplinary Procedures Center, Strategic Laboratory                                                                           | Claudio Tavares Sacchi, Claudia Regina Gonçalves, Erica Valessa Ramos Gomes, Karoline Rodrigues Campos                                                                                                                                                                                                                             |
| EPI_ISL_583503                                                                                                                                                                                                                                                                                                                                                                                                                                                                                                                                                                                                                                                                 | CTA Centro de Testagem e Aconselhamento                                                                                                                    | Instituto Adolfo Lutz, Interdisciplinary Procedures Center, Strategic Laboratory                                                                           | Claudio Tavares Sacchi, Claudia Regina Gonçalves, Erica Valessa Ramos Gomes, Karoline Rodrigues Campos                                                                                                                                                                                                                             |
| EPI_ISL_583504                                                                                                                                                                                                                                                                                                                                                                                                                                                                                                                                                                                                                                                                 | Casa de Saude Stella Maris                                                                                                                                 | Instituto Adolfo Lutz, Interdisciplinary Procedures Center, Strategic Laboratory                                                                           | Claudio Tavares Sacchi, Claudia Regina Gonçalves, Erica Valessa Ramos Gomes, Karoline Rodrigues Campos                                                                                                                                                                                                                             |
| EPI_ISL_596386                                                                                                                                                                                                                                                                                                                                                                                                                                                                                                                                                                                                                                                                 | National Institute for Allergy and Infectious Diseases Integrated Research Facility - Frederick (NIAID IRF-Frederick), National Institutes of Health (NIH) | National Institute for Allergy and Infectious Diseases Integrated Research Facility - Frederick (NIAID IRF-Frederick), National Institutes of Health (NIH) | Kocher,G., Kugelman,J.R., Beitzel,B. and Palacios,G.                                                                                                                                                                                                                                                                               |
| EPI_ISL_602518                                                                                                                                                                                                                                                                                                                                                                                                                                                                                                                                                                                                                                                                 | Institute for Virology, University Hospital Essen                                                                                                          | Center of Medical Microbiology, Virology, and Hospital Hygiene, University of Duesseldorf                                                                  | Olympia E. Anastasiou, Ulf Dittmer, Maximilian Damagnez, Alexander Dilthey, Torsten Houwaart, Lisanna Hülse, Malte Kohns Vasconcelos, Nadine Lübke, Jessica Nicolai, Klaus Pfeffer, Daniel Strelow, Jörg Timm, Andreas Walker, Tobias Wienemann                                                                                    |
| EPI_ISL_603021                                                                                                                                                                                                                                                                                                                                                                                                                                                                                                                                                                                                                                                                 | Pronto Socorro Dr. Conrado Cesarino Nuvolini                                                                                                               | Instituto Adolfo Lutz, Interdisciplinary Procedures Center, Strategic Laboratory                                                                           | Claudio Tavares Sacchi, Claudia Regina Gonçalves, Erica Valessa Ramos Gomes, Karoline Rodrigues Campos                                                                                                                                                                                                                             |
| EPI_ISL_603022                                                                                                                                                                                                                                                                                                                                                                                                                                                                                                                                                                                                                                                                 | Departamento de Vigilância à Saúde                                                                                                                         | Instituto Adolfo Lutz, Interdisciplinary Procedures Center, Strategic Laboratory                                                                           | Claudio Tavares Sacchi, Claudia Regina Gonçalves, Erica Valessa Ramos Gomes, Karoline Rodrigues Campos                                                                                                                                                                                                                             |
| EPI_ISL_603023                                                                                                                                                                                                                                                                                                                                                                                                                                                                                                                                                                                                                                                                 | Vigilância em Saúde Visa Sul                                                                                                                               | Instituto Adolfo Lutz, Interdisciplinary Procedures Center, Strategic Laboratory                                                                           | Claudio Tavares Sacchi, Claudia Regina Gonçalves, Erica Valessa Ramos Gomes, Karoline Rodrigues Campos                                                                                                                                                                                                                             |
| EPI_ISL_603024, EPI_ISL_603027                                                                                                                                                                                                                                                                                                                                                                                                                                                                                                                                                                                                                                                 | Santa Casa de Misericórdia de Araçatuba                                                                                                                    | Instituto Adolfo Lutz, Interdisciplinary Procedures Center, Strategic Laboratory                                                                           | Claudio Tavares Sacchi, Claudia Regina Gonçalves, Erica Valessa Ramos Gomes, Karoline Rodrigues Campos                                                                                                                                                                                                                             |
| EPI_ISL_603029                                                                                                                                                                                                                                                                                                                                                                                                                                                                                                                                                                                                                                                                 | Hospital Municipal Mário Gatti                                                                                                                             | Instituto Adolfo Lutz, Interdisciplinary Procedures Center, Strategic Laboratory                                                                           | Claudio Tavares Sacchi, Claudia Regina Gonçalves, Erica Valessa Ramos Gomes, Karoline Rodrigues Campos                                                                                                                                                                                                                             |
| EPI_ISL_603030                                                                                                                                                                                                                                                                                                                                                                                                                                                                                                                                                                                                                                                                 | Hospital Domingos Leonardo Ceravolo Presidente Prudente                                                                                                    | Instituto Adolfo Lutz, Interdisciplinary Procedures Center, Strategic Laboratory                                                                           | Claudio Tavares Sacchi, Claudia Regina Gonçalves, Erica Valessa Ramos Gomes, Karoline Rodrigues Campos                                                                                                                                                                                                                             |
| EPI_ISL_603033                                                                                                                                                                                                                                                                                                                                                                                                                                                                                                                                                                                                                                                                 | Vigilancia Epidemiologica de São Bernardo do Campo                                                                                                         | Instituto Adolfo Lutz, Interdisciplinary Procedures Center, Strategic Laboratory                                                                           | Claudio Tavares Sacchi, Claudia Regina Gonçalves, Erica Valessa Ramos Gomes, Karoline Rodrigues Campos                                                                                                                                                                                                                             |
| EPI_ISL_603034                                                                                                                                                                                                                                                                                                                                                                                                                                                                                                                                                                                                                                                                 | Departamento de Vigilância à Saúde                                                                                                                         | Instituto Adolfo Lutz, Interdisciplinary Procedures Center, Strategic Laboratory                                                                           | Claudio Tavares Sacchi, Claudia Regina Gonçalves, Erica Valessa Ramos Gomes, Karoline Rodrigues Campos                                                                                                                                                                                                                             |
| EPI_ISL_603036                                                                                                                                                                                                                                                                                                                                                                                                                                                                                                                                                                                                                                                                 | Hospital Santa Ana                                                                                                                                         | Instituto Adolfo Lutz, Interdisciplinary Procedures Center, Strategic Laboratory                                                                           | Claudio Tavares Sacchi, Claudia Regina Gonçalves, Erica Valessa Ramos Gomes, Karoline Rodrigues Campos                                                                                                                                                                                                                             |
| EPI_ISL_603037                                                                                                                                                                                                                                                                                                                                                                                                                                                                                                                                                                                                                                                                 | Hospital Geral de Pedreira                                                                                                                                 | Instituto Adolfo Lutz, Interdisciplinary Procedures Center, Strategic Laboratory                                                                           | Claudio Tavares Sacchi, Claudia Regina Gonçalves, Erica Valessa Ramos Gomes, Karoline Rodrigues Campos                                                                                                                                                                                                                             |
| EPI_ISL_603038                                                                                                                                                                                                                                                                                                                                                                                                                                                                                                                                                                                                                                                                 | Santa Casa de Misericórdia de Araçatuba                                                                                                                    | Instituto Adolfo Lutz, Interdisciplinary Procedures Center, Strategic Laboratory                                                                           | Claudio Tavares Sacchi, Claudia Regina Gonçalves, Erica Valessa Ramos Gomes, Karoline Rodrigues Campos                                                                                                                                                                                                                             |
| EPI_ISL_603039                                                                                                                                                                                                                                                                                                                                                                                                                                                                                                                                                                                                                                                                 | Hospital Municipal Mário Gatti                                                                                                                             | Instituto Adolfo Lutz, Interdisciplinary Procedures Center, Strategic Laboratory                                                                           | Claudio Tavares Sacchi, Claudia Regina Gonçalves, Erica Valessa Ramos Gomes, Karoline Rodrigues Campos                                                                                                                                                                                                                             |
| EPI_ISL_613708                                                                                                                                                                                                                                                                                                                                                                                                                                                                                                                                                                                                                                                                 | Laboratory of Molecular Biology, Blood Center of Ribeirão Preto                                                                                            | Laboratory of Molecular Biology, Blood Center of Ribeirão Preto, Faculty of Medicine of Ribeirão Preto, University of São Paulo                            | Svetoslav N Slavov, Marta Giovanetti, Vagner Fonseca, Elaine V Santos, Evandra S Rodrigues, Talita Adelino, Joilson Xavier, Glauco de Carvalho Pereira, Aparecida Y Yamamoto, Diego Villa Clé, Rodrigo T Calado; Dimas T Covas, Luiz CJ Alcantara, Simone Kashima                                                                  |
| EPI_ISL_613709, EPI_ISL_613951, EPI_ISL_613964                                                                                                                                                                                                                                                                                                                                                                                                                                                                                                                                                                                                                                 | Laboratory of Molecular Biology, Blood Center of Ribeirão Preto, Faculty of Medicine of Ribeirão Preto, University of São Paulo                            | Laboratory of Molecular Biology, Blood Center of Ribeirão Preto, Faculty of Medicine of Ribeirão Preto, University of São Paulo                            | Svetoslav N Slavov, Marta Giovanetti, Vagner Fonseca, Elaine V Santos, Evandra S Rodrigues, Talita Adelino, Joilson Xavier, Glauco de Carvalho Pereira, Aparecida Y Yamamoto, Diego Villa Clé, Rodrigo T Calado; Dimas T Covas, Luiz CJ Alcantara, Simone Kashima                                                                  |
| EPI_ISL_614557                                                                                                                                                                                                                                                                                                                                                                                                                                                                                                                                                                                                                                                                 | Department of Virus and Microbiological Special Diagnostics, Statens Serum Institut, Denmark                                                               | Albertsen lab, Department of Chemistry and Bioscience, Aalborg University, Denmark                                                                         | Danish Covid-19 Genome Consortia                                                                                                                                                                                                                                                                                                   |
| EPI_ISL_623104, EPI_ISL_623105                                                                                                                                                                                                                                                                                                                                                                                                                                                                                                                                                                                                                                                 | Simile Medicina Diagnóstica                                                                                                                                | Bioinformatics Laboratory / LNCC                                                                                                                           | Carolina M Voloch, Ronaldo S Francisco Jr, Luiz G P de Almeida, Otavio J. Brustolini, Cynthia C Cardoso, Alexandra L Gerber, Ana Paula de C Guimarães, Diana Mariani, Covid19-UFRJ Workgroup, Luís Cristóvão Pôrto, Renato S Aguiar, Terezinha M P P Castiñeiras, Orlando C. Ferreira, Amílcar Tanuri, Ana Tereza R de Vasconcelos |
| EPI_ISL_623106, EPI_ISL_623107, EPI_ISL_623108, EPI_ISL_623110, EPI_ISL_623112, EPI_ISL_623113, EPI_ISL_623116, EPI_ISL_623117, EPI_ISL_623120, EPI_ISL_623121, EPI_ISL_623122, EPI_ISL_623125, EPI_ISL_623127, EPI_ISL_623128, EPI_ISL_623129, EPI_ISL_623131, EPI_ISL_623133, EPI_ISL_623134, EPI_ISL_623136, EPI_ISL_623137, EPI_ISL_623138, EPI_ISL_623139, EPI_ISL_623141, EPI_ISL_623144, EPI_ISL_623145, EPI_ISL_623147, EPI_ISL_623148, EPI_ISL_623149, EPI_ISL_623150, EPI_ISL_623152, EPI_ISL_623153, EPI_ISL_623154, EPI_ISL_623156, EPI_ISL_623157, EPI_ISL_623159, EPI_ISL_623160, EPI_ISL_623161, EPI_ISL_623164, EPI_ISL_623165, EPI_ISL_623168, EPI_ISL_623169 |                                                                                                                                                            |                                                                                                                                                            |                                                                                                                                                                                                                                                                                                                                    |
| see above                                                                                                                                                                                                                                                                                                                                                                                                                                                                                                                                                                                                                                                                      | Laboratório de Virologia Molecular / UFRJ                                                                                                                  | Bioinformatics Laboratory / LNCC                                                                                                                           | Carolina M Voloch, Ronaldo S Francisco Jr, Luiz G P de Almeida, Otavio J. Brustolini, Cynthia C Cardoso, Alexandra L Gerber, Ana Paula de C Guimarães, Diana Mariani, Covid19-UFRJ Workgroup, Luís Cristóvão Pôrto, Renato S Aguiar, Terezinha M P P Castiñeiras, Orlando C. Ferreira, Amílcar Tanuri, Ana Tereza R de Vasconcelos |
| EPI_ISL_629023                                                                                                                                                                                                                                                                                                                                                                                                                                                                                                                                                                                                                                                                 | Centro de Biotecnología Vegetal, Universidad Andrés Bello, Center for Genome Regulation                                                                    | Center for Mathematical Modeling and Center for Genome Regulation. Santiago, Chile                                                                         | Bastias M, Sanhueza D, Travisany D, Allende ML, Maass A, González M, Bustos F, Arriagada G, Montecino, M, Orellana A, Castro E, Meneses C.                                                                                                                                                                                         |
| EPI_ISL_636737, EPI_ISL_636834, EPI_ISL_636836, EPI_ISL_636838                                                                                                                                                                                                                                                                                                                                                                                                                                                                                                                                                                                                                 | Laboratório de Imunofarmacologia - Instituto Oswaldo Cruz                                                                                                  | Laboratório de Imunofarmacologia - Instituto Oswaldo Cruz                                                                                                  | Souza,T.M., Fintelman-Rodrigues,N., De Paula,A.D., Saraiva,F.B., Ferreira,M.A. and Sacramento,C.Q.                                                                                                                                                                                                                                 |
| EPI_ISL_672666, EPI_ISL_672675, EPI_ISL_672679, EPI_ISL_672684                                                                                                                                                                                                                                                                                                                                                                                                                                                                                                                                                                                                                 | DB Diagnosticos do Brasil                                                                                                                                  | Laboratório de Parasitologia Médica - Instituto de Medicina Tropical - Universidade de São Paulo                                                           | Brazil-UK Centre for Arbovirus Discovery Diagnosis Genomics and Epidemiology (CADDE) Genomic Network - Instituto de Medicina Tropical                                                                                                                                                                                              |
| EPI_ISL_672687, EPI_ISL_672688, EPI_ISL_672693, EPI_ISL_672695, EPI_ISL_672696, EPI_ISL_672699                                                                                                                                                                                                                                                                                                                                                                                                                                                                                                                                                                                 | Hospital das Clínicas da Faculdade de Medicina da Universidade de São Paulo (HC-FMUSP)                                                                     | Laboratório de Parasitologia Médica - Instituto de Medicina Tropical - Universidade de São Paulo                                                           | Brazil-UK Centre for Arbovirus Discovery Diagnosis Genomics and Epidemiology (CADDE) Genomic Network - Instituto de Medicina Tropical                                                                                                                                                                                              |
| EPI_ISL_672702, EPI_ISL_672703, EPI_ISL_672705, EPI_ISL_672706, EPI_ISL_672710, EPI_ISL_672711,                                                                                                                                                                                                                                                                                                                                                                                                                                                                                                                                                                                | Institute of Tropical Medicine at the University of São Paulo (IMT-USP)                                                                                    | Laboratório de Parasitologia Médica - Instituto de Medicina Tropical - Universidade de São Paulo                                                           | Brazil-UK Centre for Arbovirus Discovery Diagnosis Genomics and Epidemiology (CADDE) Genomic Network - Instituto de Medicina Tropical                                                                                                                                                                                              |



|                                                                                                                |                                                                                        |                                                                                                  |                                                                                                                                       |
|----------------------------------------------------------------------------------------------------------------|----------------------------------------------------------------------------------------|--------------------------------------------------------------------------------------------------|---------------------------------------------------------------------------------------------------------------------------------------|
| EPI_ISL_672713, EPI_ISL_672717, EPI_ISL_672721                                                                 | Hospital das Clínicas da Faculdade de Medicina da Universidade de São Paulo (HC-FMUSP) | Laboratório de Parasitologia Médica - Instituto de Medicina Tropical - Universidade de São Paulo | Brazil-UK Centre for Arbovirus Discovery Diagnosis Genomics and Epidemiology (CADDE) Genomic Network - Instituto de Medicina Tropical |
| EPI_ISL_672722, EPI_ISL_672725, EPI_ISL_672728, EPI_ISL_672734, EPI_ISL_672735, EPI_ISL_672739, EPI_ISL_672741 | Institute of Tropical Medicine at the University of São Paulo (IMT-USP)                | Laboratório de Parasitologia Médica - Instituto de Medicina Tropical - Universidade de São Paulo | Brazil-UK Centre for Arbovirus Discovery Diagnosis Genomics and Epidemiology (CADDE) Genomic Network - Instituto de Medicina Tropical |
| EPI_ISL_672748, EPI_ISL_672750, EPI_ISL_672751                                                                 | Central de Rede de Frio Municipal                                                      | Instituto Adolfo Lutz, Interdisciplinary Procedures Center, Strategic Laboratory                 | Claudio Tavares Sacchi, Claudia Regina Gonçalves, Erica Valessa Ramos Gomes, Karoline Rodrigues Campos                                |
| EPI_ISL_693197                                                                                                 | Santa Casa de Misericórdia de Sao Paulo - Hospital Central                             | Instituto Adolfo Lutz, Interdisciplinary Procedures Center, Strategic Laboratory                 | Claudio Tavares Sacchi, Claudia Regina Gonçalves, Erica Valessa Ramos Gomes, Karoline Rodrigues Campos                                |
| EPI_ISL_693198                                                                                                 | Hospital do Servidor Publico Estadual Francisco Morato de Oliveira                     | Instituto Adolfo Lutz, Interdisciplinary Procedures Center, Strategic Laboratory                 | Claudio Tavares Sacchi, Claudia Regina Gonçalves, Erica Valessa Ramos Gomes, Karoline Rodrigues Campos                                |
| EPI_ISL_693199                                                                                                 | Hospital Municipal Doutor Arthur Ribeiro de Saboya                                     | Instituto Adolfo Lutz, Interdisciplinary Procedures Center, Strategic Laboratory                 | Claudio Tavares Sacchi, Claudia Regina Gonçalves, Erica Valessa Ramos Gomes, Karoline Rodrigues Campos                                |
| EPI_ISL_693203                                                                                                 | Pronto Socorro Dr. Conrado Cesarino Nuvolini                                           | Instituto Adolfo Lutz, Interdisciplinary Procedures Center, Strategic Laboratory                 | Claudio Tavares Sacchi, Claudia Regina Gonçalves, Erica Valessa Ramos Gomes, Karoline Rodrigues Campos                                |
| EPI_ISL_693204                                                                                                 | Hospital de Campanha Covid-19 Assis                                                    | Instituto Adolfo Lutz, Interdisciplinary Procedures Center, Strategic Laboratory                 | Claudio Tavares Sacchi, Claudia Regina Gonçalves, Erica Valessa Ramos Gomes, Karoline Rodrigues Campos                                |
| EPI_ISL_693205                                                                                                 | Cs II Doutor Antonio Vicoso Moreira de Rezende                                         | Instituto Adolfo Lutz, Interdisciplinary Procedures Center, Strategic Laboratory                 | Claudio Tavares Sacchi, Claudia Regina Gonçalves, Erica Valessa Ramos Gomes, Karoline Rodrigues Campos                                |
| EPI_ISL_693207                                                                                                 | Hospital Municipal Antonio Giglio                                                      | Instituto Adolfo Lutz, Interdisciplinary Procedures Center, Strategic Laboratory                 | Claudio Tavares Sacchi, Claudia Regina Gonçalves, Erica Valessa Ramos Gomes, Karoline Rodrigues Campos                                |
| EPI_ISL_693208, EPI_ISL_693209                                                                                 | Pronto-Socorro Dr. Osmar Mesquita                                                      | Instituto Adolfo Lutz, Interdisciplinary Procedures Center, Strategic Laboratory                 | Claudio Tavares Sacchi, Claudia Regina Gonçalves, Erica Valessa Ramos Gomes, Karoline Rodrigues Campos                                |
| EPI_ISL_693210                                                                                                 | Santa Casa de Misericordia e Maternidade                                               | Instituto Adolfo Lutz, Interdisciplinary Procedures Center, Strategic Laboratory                 | Claudio Tavares Sacchi, Claudia Regina Gonçalves, Erica Valessa Ramos Gomes, Karoline Rodrigues Campos                                |
| EPI_ISL_693211                                                                                                 | Santa Casa de Misericordia de Braganca Paulista                                        | Instituto Adolfo Lutz, Interdisciplinary Procedures Center, Strategic Laboratory                 | Claudio Tavares Sacchi, Claudia Regina Gonçalves, Erica Valessa Ramos Gomes, Karoline Rodrigues Campos                                |
| EPI_ISL_693212                                                                                                 | Unidade de Pronto Atendimento Central de Caraguatatuba                                 | Instituto Adolfo Lutz, Interdisciplinary Procedures Center, Strategic Laboratory                 | Claudio Tavares Sacchi, Claudia Regina Gonçalves, Erica Valessa Ramos Gomes, Karoline Rodrigues Campos                                |
| EPI_ISL_693214                                                                                                 | Unidade de Vigilância Epidemiológica de Araras                                         | Instituto Adolfo Lutz, Interdisciplinary Procedures Center, Strategic Laboratory                 | Claudio Tavares Sacchi, Claudia Regina Gonçalves, Erica Valessa Ramos Gomes, Karoline Rodrigues Campos                                |
| EPI_ISL_693216, EPI_ISL_693217                                                                                 | Hospital Domingos Leonardo Ceravolo Presidente Prudente                                | Instituto Adolfo Lutz, Interdisciplinary Procedures Center, Strategic Laboratory                 | Claudio Tavares Sacchi, Claudia Regina Gonçalves, Erica Valessa Ramos Gomes, Karoline Rodrigues Campos                                |
| EPI_ISL_693218                                                                                                 | Santa Casa da Misericórdia de Presidente Prudente                                      | Instituto Adolfo Lutz, Interdisciplinary Procedures Center, Strategic Laboratory                 | Claudio Tavares Sacchi, Claudia Regina Gonçalves, Erica Valessa Ramos Gomes, Karoline Rodrigues Campos                                |
| EPI_ISL_693219                                                                                                 | Laboratório Municipal de Piracicaba                                                    | Instituto Adolfo Lutz, Interdisciplinary Procedures Center, Strategic Laboratory                 | Claudio Tavares Sacchi, Claudia Regina Gonçalves, Erica Valessa Ramos Gomes, Karoline Rodrigues Campos                                |
| EPI_ISL_693220                                                                                                 | Secretaria Municipal de Saúde de Birigui                                               | Instituto Adolfo Lutz, Interdisciplinary Procedures Center, Strategic Laboratory                 | Claudio Tavares Sacchi, Claudia Regina Gonçalves, Erica Valessa Ramos Gomes, Karoline Rodrigues Campos                                |
| EPI_ISL_693221, EPI_ISL_693222                                                                                 | Laboratório Municipal de Piracicaba                                                    | Instituto Adolfo Lutz, Interdisciplinary Procedures Center, Strategic Laboratory                 | Claudio Tavares Sacchi, Claudia Regina Gonçalves, Erica Valessa Ramos Gomes, Karoline Rodrigues Campos                                |
| EPI_ISL_693223, EPI_ISL_693224                                                                                 | Ubs Vila Rosa - Olimpia Gomes De Almeida                                               | Instituto Adolfo Lutz, Interdisciplinary Procedures Center, Strategic Laboratory                 | Claudio Tavares Sacchi, Claudia Regina Gonçalves, Erica Valessa Ramos Gomes, Karoline Rodrigues Campos                                |
| EPI_ISL_693225                                                                                                 | UBS Vila Marchi                                                                        | Instituto Adolfo Lutz, Interdisciplinary Procedures Center, Strategic Laboratory                 | Claudio Tavares Sacchi, Claudia Regina Gonçalves, Erica Valessa Ramos Gomes, Karoline Rodrigues Campos                                |
| EPI_ISL_693227                                                                                                 | Secretaria Municipal de Sorocaba                                                       | Instituto Adolfo Lutz, Interdisciplinary Procedures Center, Strategic Laboratory                 | Claudio Tavares Sacchi, Claudia Regina Gonçalves, Erica Valessa Ramos Gomes, Karoline Rodrigues Campos                                |
| EPI_ISL_693228                                                                                                 | Hospital e Pronto Socorro Portinari                                                    | Instituto Adolfo Lutz, Interdisciplinary Procedures Center, Strategic Laboratory                 | Claudio Tavares Sacchi, Claudia Regina Gonçalves, Erica Valessa Ramos Gomes, Karoline Rodrigues Campos                                |
| EPI_ISL_693230                                                                                                 | Hospital Santa Cruz                                                                    | Instituto Adolfo Lutz, Interdisciplinary Procedures Center, Strategic Laboratory                 | Claudio Tavares Sacchi, Claudia Regina Gonçalves, Erica Valessa Ramos Gomes, Karoline Rodrigues Campos                                |
| EPI_ISL_693233                                                                                                 | Upa Vereador Jose Da Rocha Goncalves                                                   | Instituto Adolfo Lutz, Interdisciplinary Procedures Center, Strategic Laboratory                 | Claudio Tavares Sacchi, Claudia Regina Gonçalves, Erica Valessa Ramos Gomes, Karoline Rodrigues Campos                                |
| EPI_ISL_693234                                                                                                 | Casmi Centro Atendimento Saude da Mulher e Infancia                                    | Instituto Adolfo Lutz, Interdisciplinary Procedures Center, Strategic Laboratory                 | Claudio Tavares Sacchi, Claudia Regina Gonçalves, Erica Valessa Ramos Gomes, Karoline Rodrigues Campos                                |
| EPI_ISL_693235                                                                                                 | Hospital Santa Marcelina Sao Paulo                                                     | Instituto Adolfo Lutz, Interdisciplinary Procedures Center, Strategic Laboratory                 | Claudio Tavares Sacchi, Claudia Regina Gonçalves, Erica Valessa Ramos Gomes, Karoline Rodrigues Campos                                |
| EPI_ISL_693236                                                                                                 | UPA Santa Isabel                                                                       | Instituto Adolfo Lutz, Interdisciplinary Procedures Center, Strategic Laboratory                 | Claudio Tavares Sacchi, Claudia Regina Gonçalves, Erica Valessa Ramos Gomes, Karoline Rodrigues Campos                                |
| EPI_ISL_693237                                                                                                 | Secao Centro de Diagnostico Secedi                                                     | Instituto Adolfo Lutz, Interdisciplinary Procedures Center, Strategic Laboratory                 | Claudio Tavares Sacchi, Claudia Regina Gonçalves, Erica Valessa Ramos Gomes, Karoline Rodrigues Campos                                |
| EPI_ISL_693239                                                                                                 | Centro de Vigilância a Saude de Diadema                                                | Instituto Adolfo Lutz, Interdisciplinary Procedures Center, Strategic Laboratory                 | Claudio Tavares Sacchi, Claudia Regina Gonçalves, Erica Valessa Ramos Gomes, Karoline Rodrigues Campos                                |
| EPI_ISL_693240                                                                                                 | Hospital e Maternidade Sao Lucas                                                       | Instituto Adolfo Lutz, Interdisciplinary Procedures Center, Strategic Laboratory                 | Claudio Tavares Sacchi, Claudia Regina Gonçalves, Erica Valessa Ramos Gomes, Karoline Rodrigues Campos                                |
| EPI_ISL_693241                                                                                                 | Centro de Vigilância a Saude de Diadema                                                | Instituto Adolfo Lutz, Interdisciplinary Procedures Center, Strategic Laboratory                 | Claudio Tavares Sacchi, Claudia Regina Gonçalves, Erica Valessa Ramos Gomes, Karoline Rodrigues Campos                                |
| EPI_ISL_693242                                                                                                 | Laboratório Municipal de Piracicaba                                                    | Instituto Adolfo Lutz, Interdisciplinary Procedures Center,                                      | Claudio Tavares Sacchi, Claudia Regina Gonçalves, Erica Valessa Ramos Gomes, Karoline Rodrigues Campos                                |
| EPI_ISL_693243                                                                                                 |                                                                                        |                                                                                                  |                                                                                                                                       |

| Strategic Laboratory                                                                                                                                                                                                                                                                                                                                                                                                                                                                                                                                                                                                                                                                                                                                                                                                                                           |                                                                                                                                                                                                 |                                                                                                  |                                                                                                                                                                                                                                                                                                   |  |
|----------------------------------------------------------------------------------------------------------------------------------------------------------------------------------------------------------------------------------------------------------------------------------------------------------------------------------------------------------------------------------------------------------------------------------------------------------------------------------------------------------------------------------------------------------------------------------------------------------------------------------------------------------------------------------------------------------------------------------------------------------------------------------------------------------------------------------------------------------------|-------------------------------------------------------------------------------------------------------------------------------------------------------------------------------------------------|--------------------------------------------------------------------------------------------------|---------------------------------------------------------------------------------------------------------------------------------------------------------------------------------------------------------------------------------------------------------------------------------------------------|--|
| EPI_ISL_693246                                                                                                                                                                                                                                                                                                                                                                                                                                                                                                                                                                                                                                                                                                                                                                                                                                                 | Laboratorio Municipal de Rio Grande da Serra                                                                                                                                                    | Instituto Adolfo Lutz, Interdisciplinary Procedures Center, Strategic Laboratory                 | Claudio Tavares Sacchi, Claudia Regina Gonçalves, Erica Valessa Ramos Gomes, Karoline Rodrigues Campos                                                                                                                                                                                            |  |
| EPI_ISL_693247                                                                                                                                                                                                                                                                                                                                                                                                                                                                                                                                                                                                                                                                                                                                                                                                                                                 | Secao Centro de Diagnostico Secedi                                                                                                                                                              | Instituto Adolfo Lutz, Interdisciplinary Procedures Center, Strategic Laboratory                 | Claudio Tavares Sacchi, Claudia Regina Gonçalves, Erica Valessa Ramos Gomes, Karoline Rodrigues Campos                                                                                                                                                                                            |  |
| EPI_ISL_693248                                                                                                                                                                                                                                                                                                                                                                                                                                                                                                                                                                                                                                                                                                                                                                                                                                                 | Centro Municipal de Epidemiologia e Imunizações                                                                                                                                                 | Instituto Adolfo Lutz, Interdisciplinary Procedures Center, Strategic Laboratory                 | Claudio Tavares Sacchi, Claudia Regina Gonçalves, Erica Valessa Ramos Gomes, Karoline Rodrigues Campos                                                                                                                                                                                            |  |
| EPI_ISL_703236                                                                                                                                                                                                                                                                                                                                                                                                                                                                                                                                                                                                                                                                                                                                                                                                                                                 | Lighthouse Lab in Alderley Park                                                                                                                                                                 | Wellcome Sanger Institute for the COVID-19 Genomics UK (COG-UK) Consortium                       | Jacquelyn Wynn, Mairead Hyland, The Lighthouse Lab in Alderley Park and Alex Alderton, Roberto Amato, Sonia Goncalves, Ewan Harrison, David K. Jackson, Ian Johnston, Dominic Kwiatkowski, Cordelia Langford, John Sillitoe on behalf of the Wellcome Sanger Institute COVID-19 Surveillance Team |  |
| EPI_ISL_705416                                                                                                                                                                                                                                                                                                                                                                                                                                                                                                                                                                                                                                                                                                                                                                                                                                                 | Virology Department, Royal Infirmary of Edinburgh, NHS Lothian / School of Biological Sciences, University of Edinburgh / Institute of Genetics and Molecular Medicine, University of Edinburgh | COVID-19 Genomics UK (COG-UK) Consortium                                                         | McHugh M, Dewar R, Rooke S, Gallagher M, Balcaza C, O'Toole Á, Scher E, Hill V, McCrone JT, Colquhoun R, Yu X, Jackson B, Rambaut A, Williams TC, Templeton K                                                                                                                                     |  |
| EPI_ISL_717785, EPI_ISL_717786, EPI_ISL_717787, EPI_ISL_717788, EPI_ISL_717789, EPI_ISL_717790                                                                                                                                                                                                                                                                                                                                                                                                                                                                                                                                                                                                                                                                                                                                                                 | LACEN RJ - Noel Nutels                                                                                                                                                                          | Bioinformatics Laboratory / LNCC                                                                 | Carolina M Voloch, Ronaldo da Silva F Jr, Luiz G P de Almeida, Cynthia C Cardoso, Otavio Bustrolini, Alexandra L Gerber, Ana Paula de C Guimarães, Diana Mariani, Andréa Cony Cavalcanti, Claudia dos Santos Rodrigues, Terezinha M P P Castiñeira, Amílcar Tanuri, Ana Tereza R de Vasconcelos   |  |
| EPI_ISL_717791                                                                                                                                                                                                                                                                                                                                                                                                                                                                                                                                                                                                                                                                                                                                                                                                                                                 | Laboratorio de Virologia Molecular / UFRJ                                                                                                                                                       | Bioinformatics Laboratory / LNCC                                                                 | Carolina M Voloch, Ronaldo da Silva F Jr, Luiz G P de Almeida, Cynthia C Cardoso, Otavio Bustrolini, Alexandra L Gerber, Ana Paula de C Guimarães, Diana Mariani, Andréa Cony Cavalcanti, Claudia dos Santos Rodrigues, Terezinha M P P Castiñeira, Amílcar Tanuri, Ana Tereza R de Vasconcelos   |  |
| EPI_ISL_717792                                                                                                                                                                                                                                                                                                                                                                                                                                                                                                                                                                                                                                                                                                                                                                                                                                                 | LACEN RJ - Noel Nutels                                                                                                                                                                          | Bioinformatics Laboratory / LNCC                                                                 | Carolina M Voloch, Ronaldo da Silva F Jr, Luiz G P de Almeida, Cynthia C Cardoso, Otavio Bustrolini, Alexandra L Gerber, Ana Paula de C Guimarães, Diana Mariani, Andréa Cony Cavalcanti, Claudia dos Santos Rodrigues, Terezinha M P P Castiñeira, Amílcar Tanuri, Ana Tereza R de Vasconcelos   |  |
| EPI_ISL_717793                                                                                                                                                                                                                                                                                                                                                                                                                                                                                                                                                                                                                                                                                                                                                                                                                                                 | Laboratorio de Virologia Molecular / UFRJ                                                                                                                                                       | Bioinformatics Laboratory / LNCC                                                                 | Carolina M Voloch, Ronaldo da Silva F Jr, Luiz G P de Almeida, Cynthia C Cardoso, Otavio Bustrolini, Alexandra L Gerber, Ana Paula de C Guimarães, Diana Mariani, Andréa Cony Cavalcanti, Claudia dos Santos Rodrigues, Terezinha M P P Castiñeira, Amílcar Tanuri, Ana Tereza R de Vasconcelos   |  |
| EPI_ISL_717794                                                                                                                                                                                                                                                                                                                                                                                                                                                                                                                                                                                                                                                                                                                                                                                                                                                 | LACEN RJ - Noel Nutels                                                                                                                                                                          | Bioinformatics Laboratory / LNCC                                                                 | Carolina M Voloch, Ronaldo da Silva F Jr, Luiz G P de Almeida, Cynthia C Cardoso, Otavio Bustrolini, Alexandra L Gerber, Ana Paula de C Guimarães, Diana Mariani, Andréa Cony Cavalcanti, Claudia dos Santos Rodrigues, Terezinha M P P Castiñeira, Amílcar Tanuri, Ana Tereza R de Vasconcelos   |  |
| EPI_ISL_717806, EPI_ISL_717807, EPI_ISL_717808                                                                                                                                                                                                                                                                                                                                                                                                                                                                                                                                                                                                                                                                                                                                                                                                                 | Laboratorio de Virologia Molecular / UFRJ                                                                                                                                                       | Bioinformatics Laboratory / LNCC                                                                 | Carolina M Voloch, Ronaldo da Silva F Jr, Luiz G P de Almeida, Cynthia C Cardoso, Otavio Bustrolini, Alexandra L Gerber, Ana Paula de C Guimarães, Diana Mariani, Andréa Cony Cavalcanti, Claudia dos Santos Rodrigues, Terezinha M P P Castiñeira, Amílcar Tanuri, Ana Tereza R de Vasconcelos   |  |
| EPI_ISL_717809                                                                                                                                                                                                                                                                                                                                                                                                                                                                                                                                                                                                                                                                                                                                                                                                                                                 | LACEN Dr. Francisco Rimolo Neto                                                                                                                                                                 | Bioinformatics Laboratory / LNCC                                                                 | Carolina M Voloch, Ronaldo da Silva F Jr, Luiz G P de Almeida, Cynthia C Cardoso, Otavio Bustrolini, Alexandra L Gerber, Ana Paula de C Guimarães, Diana Mariani, Andréa Cony Cavalcanti, Claudia dos Santos Rodrigues, Terezinha M P P Castiñeira, Amílcar Tanuri, Ana Tereza R de Vasconcelos   |  |
| EPI_ISL_717814, EPI_ISL_717816, EPI_ISL_717818, EPI_ISL_717821, EPI_ISL_717822, EPI_ISL_717823, EPI_ISL_717824, EPI_ISL_717825, EPI_ISL_717826, EPI_ISL_717827, EPI_ISL_717829, EPI_ISL_717830, EPI_ISL_717831                                                                                                                                                                                                                                                                                                                                                                                                                                                                                                                                                                                                                                                 | Laboratorio de Virologia Molecular / UFRJ                                                                                                                                                       | Bioinformatics Laboratory / LNCC                                                                 | Carolina M Voloch, Ronaldo da Silva F Jr, Luiz G P de Almeida, Cynthia C Cardoso, Otavio Bustrolini, Alexandra L Gerber, Ana Paula de C Guimarães, Diana Mariani, Andréa Cony Cavalcanti, Claudia dos Santos Rodrigues, Terezinha M P P Castiñeira, Amílcar Tanuri, Ana Tereza R de Vasconcelos   |  |
| see above                                                                                                                                                                                                                                                                                                                                                                                                                                                                                                                                                                                                                                                                                                                                                                                                                                                      | Laboratorio de Virologia Molecular / UFRJ                                                                                                                                                       | Bioinformatics Laboratory / LNCC                                                                 | Carolina M Voloch, Ronaldo da Silva F Jr, Luiz G P de Almeida, Cynthia C Cardoso, Otavio Bustrolini, Alexandra L Gerber, Ana Paula de C Guimarães, Diana Mariani, Andréa Cony Cavalcanti, Claudia dos Santos Rodrigues, Terezinha M P P Castiñeira, Amílcar Tanuri, Ana Tereza R de Vasconcelos   |  |
| EPI_ISL_717832, EPI_ISL_717833, EPI_ISL_717835                                                                                                                                                                                                                                                                                                                                                                                                                                                                                                                                                                                                                                                                                                                                                                                                                 | LACEN Dr. Francisco Rimolo Neto                                                                                                                                                                 | Bioinformatics Laboratory / LNCC                                                                 | Carolina M Voloch, Ronaldo da Silva F Jr, Luiz G P de Almeida, Cynthia C Cardoso, Otavio Bustrolini, Alexandra L Gerber, Ana Paula de C Guimarães, Diana Mariani, Andréa Cony Cavalcanti, Claudia dos Santos Rodrigues, Terezinha M P P Castiñeira, Amílcar Tanuri, Ana Tereza R de Vasconcelos   |  |
| EPI_ISL_717837, EPI_ISL_717838                                                                                                                                                                                                                                                                                                                                                                                                                                                                                                                                                                                                                                                                                                                                                                                                                                 | Laboratorio de Virologia Molecular / UFRJ                                                                                                                                                       | Bioinformatics Laboratory / LNCC                                                                 | Carolina M Voloch, Ronaldo da Silva F Jr, Luiz G P de Almeida, Cynthia C Cardoso, Otavio Bustrolini, Alexandra L Gerber, Ana Paula de C Guimarães, Diana Mariani, Andréa Cony Cavalcanti, Claudia dos Santos Rodrigues, Terezinha M P P Castiñeira, Amílcar Tanuri, Ana Tereza R de Vasconcelos   |  |
| EPI_ISL_717841                                                                                                                                                                                                                                                                                                                                                                                                                                                                                                                                                                                                                                                                                                                                                                                                                                                 | LACEN Dr. Francisco Rimolo Neto                                                                                                                                                                 | Bioinformatics Laboratory / LNCC                                                                 | Carolina M Voloch, Ronaldo da Silva F Jr, Luiz G P de Almeida, Cynthia C Cardoso, Otavio Bustrolini, Alexandra L Gerber, Ana Paula de C Guimarães, Diana Mariani, Andréa Cony Cavalcanti, Claudia dos Santos Rodrigues, Terezinha M P P Castiñeira, Amílcar Tanuri, Ana Tereza R de Vasconcelos   |  |
| EPI_ISL_717842, EPI_ISL_717843, EPI_ISL_717844, EPI_ISL_717849, EPI_ISL_717850, EPI_ISL_717851, EPI_ISL_717853, EPI_ISL_717854, EPI_ISL_717855, EPI_ISL_717856, EPI_ISL_717857, EPI_ISL_717858, EPI_ISL_717861, EPI_ISL_717863, EPI_ISL_717864, EPI_ISL_717865, EPI_ISL_717866, EPI_ISL_717867, EPI_ISL_717868, EPI_ISL_717869, EPI_ISL_717873, EPI_ISL_717874, EPI_ISL_717875, EPI_ISL_717876, EPI_ISL_717877, EPI_ISL_717878, EPI_ISL_717879, EPI_ISL_717880, EPI_ISL_717881, EPI_ISL_717882, EPI_ISL_717883, EPI_ISL_717884, EPI_ISL_717885, EPI_ISL_717887, EPI_ISL_717889, EPI_ISL_717890, EPI_ISL_717892, EPI_ISL_717893, EPI_ISL_717894, EPI_ISL_717895, EPI_ISL_717896, EPI_ISL_717898                                                                                                                                                                 | Laboratorio de Virologia Molecular / UFRJ                                                                                                                                                       | Bioinformatics Laboratory / LNCC                                                                 | Carolina M Voloch, Ronaldo da Silva F Jr, Luiz G P de Almeida, Cynthia C Cardoso, Otavio Bustrolini, Alexandra L Gerber, Ana Paula de C Guimarães, Diana Mariani, Andréa Cony Cavalcanti, Claudia dos Santos Rodrigues, Terezinha M P P Castiñeira, Amílcar Tanuri, Ana Tereza R de Vasconcelos   |  |
| see above                                                                                                                                                                                                                                                                                                                                                                                                                                                                                                                                                                                                                                                                                                                                                                                                                                                      | Laboratorio de Virologia Molecular / UFRJ                                                                                                                                                       | Bioinformatics Laboratory / LNCC                                                                 | Carolina M Voloch, Ronaldo da Silva F Jr, Luiz G P de Almeida, Cynthia C Cardoso, Otavio Bustrolini, Alexandra L Gerber, Ana Paula de C Guimarães, Diana Mariani, Andréa Cony Cavalcanti, Claudia dos Santos Rodrigues, Terezinha M P P Castiñeira, Amílcar Tanuri, Ana Tereza R de Vasconcelos   |  |
| EPI_ISL_717899, EPI_ISL_717900, EPI_ISL_717901, EPI_ISL_717902, EPI_ISL_717903, EPI_ISL_717904, EPI_ISL_717905, EPI_ISL_717906, EPI_ISL_717907, EPI_ISL_717908, EPI_ISL_717909                                                                                                                                                                                                                                                                                                                                                                                                                                                                                                                                                                                                                                                                                 | LACEN RJ - Noel Nutels                                                                                                                                                                          | Bioinformatics Laboratory / LNCC                                                                 | Carolina M Voloch, Ronaldo da Silva F Jr, Luiz G P de Almeida, Cynthia C Cardoso, Otavio Bustrolini, Alexandra L Gerber, Ana Paula de C Guimarães, Diana Mariani, Andréa Cony Cavalcanti, Claudia dos Santos Rodrigues, Terezinha M P P Castiñeira, Amílcar Tanuri, Ana Tereza R de Vasconcelos   |  |
| see above                                                                                                                                                                                                                                                                                                                                                                                                                                                                                                                                                                                                                                                                                                                                                                                                                                                      | LACEN RJ - Noel Nutels                                                                                                                                                                          | Bioinformatics Laboratory / LNCC                                                                 | Carolina M Voloch, Ronaldo da Silva F Jr, Luiz G P de Almeida, Cynthia C Cardoso, Otavio Bustrolini, Alexandra L Gerber, Ana Paula de C Guimarães, Diana Mariani, Andréa Cony Cavalcanti, Claudia dos Santos Rodrigues, Terezinha M P P Castiñeira, Amílcar Tanuri, Ana Tereza R de Vasconcelos   |  |
| EPI_ISL_717911, EPI_ISL_717913, EPI_ISL_717914, EPI_ISL_717915, EPI_ISL_717916, EPI_ISL_717917, EPI_ISL_717919                                                                                                                                                                                                                                                                                                                                                                                                                                                                                                                                                                                                                                                                                                                                                 | LACEN Dr. Francisco Rimolo Neto                                                                                                                                                                 | Bioinformatics Laboratory / LNCC                                                                 | Carolina M Voloch, Ronaldo da Silva F Jr, Luiz G P de Almeida, Cynthia C Cardoso, Otavio Bustrolini, Alexandra L Gerber, Ana Paula de C Guimarães, Diana Mariani, Andréa Cony Cavalcanti, Claudia dos Santos Rodrigues, Terezinha M P P Castiñeira, Amílcar Tanuri, Ana Tereza R de Vasconcelos   |  |
| EPI_ISL_717920, EPI_ISL_717921, EPI_ISL_717923, EPI_ISL_717924, EPI_ISL_717925, EPI_ISL_717926, EPI_ISL_717928, EPI_ISL_717929, EPI_ISL_717930, EPI_ISL_717931, EPI_ISL_717937, EPI_ISL_717938, EPI_ISL_717939, EPI_ISL_717942, EPI_ISL_717947, EPI_ISL_717948, EPI_ISL_717949, EPI_ISL_717950, EPI_ISL_717952, EPI_ISL_717955, EPI_ISL_717956, EPI_ISL_717957                                                                                                                                                                                                                                                                                                                                                                                                                                                                                                 | Laboratorio de Virologia Molecular / UFRJ                                                                                                                                                       | Bioinformatics Laboratory / LNCC                                                                 | Carolina M Voloch, Ronaldo da Silva F Jr, Luiz G P de Almeida, Cynthia C Cardoso, Otavio Bustrolini, Alexandra L Gerber, Ana Paula de C Guimarães, Diana Mariani, Andréa Cony Cavalcanti, Claudia dos Santos Rodrigues, Terezinha M P P Castiñeira, Amílcar Tanuri, Ana Tereza R de Vasconcelos   |  |
| see above                                                                                                                                                                                                                                                                                                                                                                                                                                                                                                                                                                                                                                                                                                                                                                                                                                                      | Laboratorio de Virologia Molecular / UFRJ                                                                                                                                                       | Bioinformatics Laboratory / LNCC                                                                 | Carolina M Voloch, Ronaldo da Silva F Jr, Luiz G P de Almeida, Cynthia C Cardoso, Otavio Bustrolini, Alexandra L Gerber, Ana Paula de C Guimarães, Diana Mariani, Andréa Cony Cavalcanti, Claudia dos Santos Rodrigues, Terezinha M P P Castiñeira, Amílcar Tanuri, Ana Tereza R de Vasconcelos   |  |
| EPI_ISL_717958                                                                                                                                                                                                                                                                                                                                                                                                                                                                                                                                                                                                                                                                                                                                                                                                                                                 | LACEN Dr. Francisco Rimolo Neto                                                                                                                                                                 | Bioinformatics Laboratory / LNCC                                                                 | Carolina M Voloch, Ronaldo da Silva F Jr, Luiz G P de Almeida, Cynthia C Cardoso, Otavio Bustrolini, Alexandra L Gerber, Ana Paula de C Guimarães, Diana Mariani, Andréa Cony Cavalcanti, Claudia dos Santos Rodrigues, Terezinha M P P Castiñeira, Amílcar Tanuri, Ana Tereza R de Vasconcelos   |  |
| EPI_ISL_717959, EPI_ISL_717960, EPI_ISL_717961                                                                                                                                                                                                                                                                                                                                                                                                                                                                                                                                                                                                                                                                                                                                                                                                                 | Laboratorio de Virologia Molecular / UFRJ                                                                                                                                                       | Bioinformatics Laboratory / LNCC                                                                 | Carolina M Voloch, Ronaldo da Silva F Jr, Luiz G P de Almeida, Cynthia C Cardoso, Otavio Bustrolini, Alexandra L Gerber, Ana Paula de C Guimarães, Diana Mariani, Andréa Cony Cavalcanti, Claudia dos Santos Rodrigues, Terezinha M P P Castiñeira, Amílcar Tanuri, Ana Tereza R de Vasconcelos   |  |
| EPI_ISL_717962                                                                                                                                                                                                                                                                                                                                                                                                                                                                                                                                                                                                                                                                                                                                                                                                                                                 | LACEN RJ - Noel Nutels                                                                                                                                                                          | Bioinformatics Laboratory / LNCC                                                                 | Carolina M Voloch, Ronaldo da Silva F Jr, Luiz G P de Almeida, Cynthia C Cardoso, Otavio Bustrolini, Alexandra L Gerber, Ana Paula de C Guimarães, Diana Mariani, Andréa Cony Cavalcanti, Claudia dos Santos Rodrigues, Terezinha M P P Castiñeira, Amílcar Tanuri, Ana Tereza R de Vasconcelos   |  |
| EPI_ISL_717963                                                                                                                                                                                                                                                                                                                                                                                                                                                                                                                                                                                                                                                                                                                                                                                                                                                 | LACEN Dr. Francisco Rimolo Neto                                                                                                                                                                 | Bioinformatics Laboratory / LNCC                                                                 | Carolina M Voloch, Ronaldo da Silva F Jr, Luiz G P de Almeida, Cynthia C Cardoso, Otavio Bustrolini, Alexandra L Gerber, Ana Paula de C Guimarães, Diana Mariani, Andréa Cony Cavalcanti, Claudia dos Santos Rodrigues, Terezinha M P P Castiñeira, Amílcar Tanuri, Ana Tereza R de Vasconcelos   |  |
| EPI_ISL_721987, EPI_ISL_721988, EPI_ISL_721989, EPI_ISL_721990, EPI_ISL_721991, EPI_ISL_721992, EPI_ISL_721993, EPI_ISL_721994, EPI_ISL_721995, EPI_ISL_721996, EPI_ISL_721998, EPI_ISL_721999, EPI_ISL_722000, EPI_ISL_722001, EPI_ISL_722002, EPI_ISL_722003, EPI_ISL_722004, EPI_ISL_722005, EPI_ISL_722006, EPI_ISL_722007, EPI_ISL_722008, EPI_ISL_722011, EPI_ISL_722012, EPI_ISL_722013, EPI_ISL_722014, EPI_ISL_722015, EPI_ISL_722016, EPI_ISL_722017, EPI_ISL_722018, EPI_ISL_722019, EPI_ISL_722022, EPI_ISL_722023, EPI_ISL_722024, EPI_ISL_722025, EPI_ISL_722026, EPI_ISL_722027, EPI_ISL_722029, EPI_ISL_722030, EPI_ISL_722031, EPI_ISL_722032, EPI_ISL_722035, EPI_ISL_722036, EPI_ISL_722038, EPI_ISL_722039, EPI_ISL_722040, EPI_ISL_722042, EPI_ISL_722044, EPI_ISL_722047, EPI_ISL_722048, EPI_ISL_722049, EPI_ISL_722050, EPI_ISL_722051 | Hospital das Clínicas Universidade de São Paulo Medical School                                                                                                                                  | Laboratório de Parasitologia Médica - Instituto de Medicina Tropical - Universidade de São Paulo | Brazil-UK Centre for Arbovirus Discovery Diagnosis Genomics and Epidemiology (CADDE) Genomic Network - Instituto de Medicina Tropical                                                                                                                                                             |  |
| EPI_ISL_722130, EPI_ISL_722131                                                                                                                                                                                                                                                                                                                                                                                                                                                                                                                                                                                                                                                                                                                                                                                                                                 | Instituto de Medicina Tropical Universidade de São Paulo                                                                                                                                        | Laboratório de Parasitologia Médica - Instituto de Medicina Tropical - Universidade de São Paulo | Brazil-UK Centre for Arbovirus Discovery Diagnosis Genomics and Epidemiology (CADDE) Genomic Network - Instituto de Medicina Tropical                                                                                                                                                             |  |
| EPI_ISL_722134, EPI_ISL_722135, EPI_ISL_722136, EPI_ISL_722137                                                                                                                                                                                                                                                                                                                                                                                                                                                                                                                                                                                                                                                                                                                                                                                                 | DB Diagnosticos do Brasil                                                                                                                                                                       | Laboratório de Parasitologia Médica - Instituto de Medicina Tropical - Universidade de São Paulo | Brazil-UK Centre for Arbovirus Discovery Diagnosis Genomics and Epidemiology (CADDE) Genomic Network - Instituto de Medicina Tropical                                                                                                                                                             |  |
| EPI_ISL_729477                                                                                                                                                                                                                                                                                                                                                                                                                                                                                                                                                                                                                                                                                                                                                                                                                                                 | Charité Universitätsmedizin Berlin, Institut für Virologie/Labor                                                                                                                                | Charité Universitätsmedizin Berlin, Institut für Virologie                                       | Victor M Corman, Barbara Mühlemann, Jörn Beheim-Schwarzbach, Talitha Veith, Julia Schneider, Terry Jones, Christian Drosten                                                                                                                                                                       |  |

Berlin

|                                                                                                                                                                                                                                                                                                                                                                                                                                                                                                                                                                                                |           |                                                                                                     |                                                                                  |                                                                                                                                                                                                                                           |
|------------------------------------------------------------------------------------------------------------------------------------------------------------------------------------------------------------------------------------------------------------------------------------------------------------------------------------------------------------------------------------------------------------------------------------------------------------------------------------------------------------------------------------------------------------------------------------------------|-----------|-----------------------------------------------------------------------------------------------------|----------------------------------------------------------------------------------|-------------------------------------------------------------------------------------------------------------------------------------------------------------------------------------------------------------------------------------------|
| EPI_ISL_729794, EPI_ISL_729795, EPI_ISL_729797, EPI_ISL_729799, EPI_ISL_729800, EPI_ISL_729801, EPI_ISL_729802, EPI_ISL_729803, EPI_ISL_729804, EPI_ISL_729813, EPI_ISL_729816, EPI_ISL_729818, EPI_ISL_729820, EPI_ISL_729821, EPI_ISL_729823, EPI_ISL_729824, EPI_ISL_729825, EPI_ISL_729827, EPI_ISL_729828, EPI_ISL_729831, EPI_ISL_729832, EPI_ISL_729834, EPI_ISL_729835, EPI_ISL_729838, EPI_ISL_729841, EPI_ISL_729843, EPI_ISL_729845, EPI_ISL_729849, EPI_ISL_729850, EPI_ISL_729852, EPI_ISL_729853, EPI_ISL_729854, EPI_ISL_729855, EPI_ISL_729856, EPI_ISL_729858, EPI_ISL_729859 | see above | Laboratório Central de Saúde Pública do Estado do Rio Grande do Sul (LACEN-RS)                      | Laboratory of Respiratory Viruses and Measles, Oswaldo Cruz Institute, FIOCRUZ   | Paola Resende, Luciana Appolinario, Fernando Motta, Anna Carolina Paixão, Ana Carolina Mendonça, Tatiana Schaffer Gregianini, Marilda Tereza Mar da Rosa, Marilda Siqueira on behalf of the Fiocruz COVID-19 Genomic Surveillance Network |
| EPI_ISL_735397                                                                                                                                                                                                                                                                                                                                                                                                                                                                                                                                                                                 |           | Unidade Respiratória Nova Hortolandia                                                               | Instituto Adolfo Lutz, Interdisciplinary Procedures Center, Strategic Laboratory | Claudio Tavares Sacchi, Claudia Regina Gonçalves, Erica Valessa Ramos Gomes, Karoline Rodrigues Campos                                                                                                                                    |
| EPI_ISL_735400                                                                                                                                                                                                                                                                                                                                                                                                                                                                                                                                                                                 |           | Instituto Adolfo Lutz - Regional de Santos                                                          | Instituto Adolfo Lutz, Interdisciplinary Procedures Center, Strategic Laboratory | Claudio Tavares Sacchi, Claudia Regina Gonçalves, Erica Valessa Ramos Gomes, Karoline Rodrigues Campos                                                                                                                                    |
| EPI_ISL_735401, EPI_ISL_735402, EPI_ISL_735403                                                                                                                                                                                                                                                                                                                                                                                                                                                                                                                                                 |           | Instituto Adolfo Lutz - Regional de Rio Claro                                                       | Instituto Adolfo Lutz, Interdisciplinary Procedures Center, Strategic Laboratory | Claudio Tavares Sacchi, Claudia Regina Gonçalves, Erica Valessa Ramos Gomes, Karoline Rodrigues Campos                                                                                                                                    |
| EPI_ISL_735408                                                                                                                                                                                                                                                                                                                                                                                                                                                                                                                                                                                 |           | COVID 19 Centro de Combate ao Coronavirus CCC Jandira                                               | Instituto Adolfo Lutz, Interdisciplinary Procedures Center, Strategic Laboratory | Claudio Tavares Sacchi, Claudia Regina Gonçalves, Erica Valessa Ramos Gomes, Karoline Rodrigues Campos                                                                                                                                    |
| EPI_ISL_735411                                                                                                                                                                                                                                                                                                                                                                                                                                                                                                                                                                                 |           | Centro de Vigilância a Saude de Diadema                                                             | Instituto Adolfo Lutz, Interdisciplinary Procedures Center, Strategic Laboratory | Claudio Tavares Sacchi, Claudia Regina Gonçalves, Erica Valessa Ramos Gomes, Karoline Rodrigues Campos                                                                                                                                    |
| EPI_ISL_735412                                                                                                                                                                                                                                                                                                                                                                                                                                                                                                                                                                                 |           | Hospital e Pronto Socorro Portinari                                                                 | Instituto Adolfo Lutz, Interdisciplinary Procedures Center, Strategic Laboratory | Claudio Tavares Sacchi, Claudia Regina Gonçalves, Erica Valessa Ramos Gomes, Karoline Rodrigues Campos                                                                                                                                    |
| EPI_ISL_735413                                                                                                                                                                                                                                                                                                                                                                                                                                                                                                                                                                                 |           | Militello Centro de Diagnosticos e Biopesquisa Clinica                                              | Instituto Adolfo Lutz, Interdisciplinary Procedures Center, Strategic Laboratory | Claudio Tavares Sacchi, Claudia Regina Gonçalves, Erica Valessa Ramos Gomes, Karoline Rodrigues Campos                                                                                                                                    |
| EPI_ISL_735414, EPI_ISL_735415                                                                                                                                                                                                                                                                                                                                                                                                                                                                                                                                                                 |           | Unidade de Pronto Atendimento de Agenor de Campos                                                   | Instituto Adolfo Lutz, Interdisciplinary Procedures Center, Strategic Laboratory | Claudio Tavares Sacchi, Claudia Regina Gonçalves, Erica Valessa Ramos Gomes, Karoline Rodrigues Campos                                                                                                                                    |
| EPI_ISL_735416                                                                                                                                                                                                                                                                                                                                                                                                                                                                                                                                                                                 |           | Centro de Saude II Dr Jose Paione Mococa                                                            | Instituto Adolfo Lutz, Interdisciplinary Procedures Center, Strategic Laboratory | Claudio Tavares Sacchi, Claudia Regina Gonçalves, Erica Valessa Ramos Gomes, Karoline Rodrigues Campos                                                                                                                                    |
| EPI_ISL_735417                                                                                                                                                                                                                                                                                                                                                                                                                                                                                                                                                                                 |           | Unidade de Pronto Atendimento de Agenor de Campos                                                   | Instituto Adolfo Lutz, Interdisciplinary Procedures Center, Strategic Laboratory | Claudio Tavares Sacchi, Claudia Regina Gonçalves, Erica Valessa Ramos Gomes, Karoline Rodrigues Campos                                                                                                                                    |
| EPI_ISL_735418                                                                                                                                                                                                                                                                                                                                                                                                                                                                                                                                                                                 |           | Hospital Regional do Vale do Paraíba                                                                | Instituto Adolfo Lutz, Interdisciplinary Procedures Center, Strategic Laboratory | Claudio Tavares Sacchi, Claudia Regina Gonçalves, Erica Valessa Ramos Gomes, Karoline Rodrigues Campos                                                                                                                                    |
| EPI_ISL_735419                                                                                                                                                                                                                                                                                                                                                                                                                                                                                                                                                                                 |           | UBS Alvarenga                                                                                       | Instituto Adolfo Lutz, Interdisciplinary Procedures Center, Strategic Laboratory | Claudio Tavares Sacchi, Claudia Regina Gonçalves, Erica Valessa Ramos Gomes, Karoline Rodrigues Campos                                                                                                                                    |
| EPI_ISL_735420                                                                                                                                                                                                                                                                                                                                                                                                                                                                                                                                                                                 |           | UBS Riacho Grande                                                                                   | Instituto Adolfo Lutz, Interdisciplinary Procedures Center, Strategic Laboratory | Claudio Tavares Sacchi, Claudia Regina Gonçalves, Erica Valessa Ramos Gomes, Karoline Rodrigues Campos                                                                                                                                    |
| EPI_ISL_735423, EPI_ISL_735424                                                                                                                                                                                                                                                                                                                                                                                                                                                                                                                                                                 |           | Centro de Vigilância a Saude de Diadema                                                             | Instituto Adolfo Lutz, Interdisciplinary Procedures Center, Strategic Laboratory | Claudio Tavares Sacchi, Claudia Regina Gonçalves, Erica Valessa Ramos Gomes, Karoline Rodrigues Campos                                                                                                                                    |
| EPI_ISL_735425                                                                                                                                                                                                                                                                                                                                                                                                                                                                                                                                                                                 |           | Hospital e Maternidade Sao Lucas                                                                    | Instituto Adolfo Lutz, Interdisciplinary Procedures Center, Strategic Laboratory | Claudio Tavares Sacchi, Claudia Regina Gonçalves, Erica Valessa Ramos Gomes, Karoline Rodrigues Campos                                                                                                                                    |
| EPI_ISL_735426                                                                                                                                                                                                                                                                                                                                                                                                                                                                                                                                                                                 |           | Centro de Vigilância a Saude de Diadema                                                             | Instituto Adolfo Lutz, Interdisciplinary Procedures Center, Strategic Laboratory | Claudio Tavares Sacchi, Claudia Regina Gonçalves, Erica Valessa Ramos Gomes, Karoline Rodrigues Campos                                                                                                                                    |
| EPI_ISL_735427                                                                                                                                                                                                                                                                                                                                                                                                                                                                                                                                                                                 |           | Instituto Adolfo Lutz - Regional de Santos                                                          | Instituto Adolfo Lutz, Interdisciplinary Procedures Center, Strategic Laboratory | Claudio Tavares Sacchi, Claudia Regina Gonçalves, Erica Valessa Ramos Gomes, Karoline Rodrigues Campos                                                                                                                                    |
| EPI_ISL_735428, EPI_ISL_735429                                                                                                                                                                                                                                                                                                                                                                                                                                                                                                                                                                 |           | Hospital Nipo Brasileiro                                                                            | Instituto Adolfo Lutz, Interdisciplinary Procedures Center, Strategic Laboratory | Claudio Tavares Sacchi, Claudia Regina Gonçalves, Erica Valessa Ramos Gomes, Karoline Rodrigues Campos                                                                                                                                    |
| EPI_ISL_735430                                                                                                                                                                                                                                                                                                                                                                                                                                                                                                                                                                                 |           | Instituto Adolfo Lutz - Regional de Santos                                                          | Instituto Adolfo Lutz, Interdisciplinary Procedures Center, Strategic Laboratory | Claudio Tavares Sacchi, Claudia Regina Gonçalves, Erica Valessa Ramos Gomes, Karoline Rodrigues Campos                                                                                                                                    |
| EPI_ISL_735431, EPI_ISL_735432                                                                                                                                                                                                                                                                                                                                                                                                                                                                                                                                                                 |           | Hospital Nipo Brasileiro                                                                            | Instituto Adolfo Lutz, Interdisciplinary Procedures Center, Strategic Laboratory | Claudio Tavares Sacchi, Claudia Regina Gonçalves, Erica Valessa Ramos Gomes, Karoline Rodrigues Campos                                                                                                                                    |
| EPI_ISL_735433                                                                                                                                                                                                                                                                                                                                                                                                                                                                                                                                                                                 |           | Posto de Atendimento Saude Cidade Pasc Cajati                                                       | Instituto Adolfo Lutz, Interdisciplinary Procedures Center, Strategic Laboratory | Claudio Tavares Sacchi, Claudia Regina Gonçalves, Erica Valessa Ramos Gomes, Karoline Rodrigues Campos                                                                                                                                    |
| EPI_ISL_751348, EPI_ISL_751355                                                                                                                                                                                                                                                                                                                                                                                                                                                                                                                                                                 |           | IRCCS Sacro Cuore Don Calabria Hospital, Department of Infectious, Tropical Diseases & Microbiology | University of Verona, Department of Biotechnology                                | Antonio Mori, Michela Deiana, Elena Pomari, Chiara Piubelli; Giulia Lopatriello, Luca Marcolungo, Cristina Beltrami, Chiara Degli Esposti, Emanuela Cosentino, Massimo Delledonne                                                         |
| EPI_ISL_755640                                                                                                                                                                                                                                                                                                                                                                                                                                                                                                                                                                                 |           | Instituto Adolfo Lutz - Central                                                                     | Instituto Adolfo Lutz, Interdisciplinary Procedures Center, Strategic Laboratory | Claudio Tavares Sacchi, Claudia Regina Gonçalves, Erica Valessa Ramos Gomes, Karoline Rodrigues Campos                                                                                                                                    |
| EPI_ISL_755641                                                                                                                                                                                                                                                                                                                                                                                                                                                                                                                                                                                 |           | Instituto Adolfo Lutz - Regional de Santo Andre                                                     | Instituto Adolfo Lutz, Interdisciplinary Procedures Center, Strategic Laboratory | Claudio Tavares Sacchi, Claudia Regina Gonçalves, Erica Valessa Ramos Gomes, Karoline Rodrigues Campos                                                                                                                                    |
| EPI_ISL_755642, EPI_ISL_755643                                                                                                                                                                                                                                                                                                                                                                                                                                                                                                                                                                 |           | Instituto Adolfo Lutz - Central                                                                     | Instituto Adolfo Lutz, Interdisciplinary Procedures Center, Strategic Laboratory | Claudio Tavares Sacchi, Claudia Regina Gonçalves, Erica Valessa Ramos Gomes, Karoline Rodrigues Campos                                                                                                                                    |
| EPI_ISL_755644, EPI_ISL_755645                                                                                                                                                                                                                                                                                                                                                                                                                                                                                                                                                                 |           | Lab LOC - Itapeperica da Serra                                                                      | Instituto Adolfo Lutz, Interdisciplinary Procedures Center, Strategic Laboratory | Claudio Tavares Sacchi, Claudia Regina Gonçalves, Erica Valessa Ramos Gomes, Karoline Rodrigues Campos                                                                                                                                    |
| EPI_ISL_755646, EPI_ISL_755647                                                                                                                                                                                                                                                                                                                                                                                                                                                                                                                                                                 |           | Instituto Adolfo Lutz - Regional de Santo Andre                                                     | Instituto Adolfo Lutz, Interdisciplinary Procedures Center, Strategic Laboratory | Claudio Tavares Sacchi, Claudia Regina Gonçalves, Erica Valessa Ramos Gomes, Karoline Rodrigues Campos                                                                                                                                    |
| EPI_ISL_755648                                                                                                                                                                                                                                                                                                                                                                                                                                                                                                                                                                                 |           | Instituto Adolfo Lutz - Regional de Taubate                                                         | Instituto Adolfo Lutz, Interdisciplinary Procedures Center, Strategic Laboratory | Claudio Tavares Sacchi, Claudia Regina Gonçalves, Erica Valessa Ramos Gomes, Karoline Rodrigues Campos                                                                                                                                    |
| EPI_ISL_755649                                                                                                                                                                                                                                                                                                                                                                                                                                                                                                                                                                                 |           | Instituto Adolfo Lutz - Regional de Santo Andre                                                     | Instituto Adolfo Lutz, Interdisciplinary Procedures Center, Strategic Laboratory | Claudio Tavares Sacchi, Claudia Regina Gonçalves, Erica Valessa Ramos Gomes, Karoline Rodrigues Campos                                                                                                                                    |
| EPI_ISL_755650                                                                                                                                                                                                                                                                                                                                                                                                                                                                                                                                                                                 |           | Instituto Adolfo Lutz - Regional de Taubate                                                         | Instituto Adolfo Lutz, Interdisciplinary Procedures Center, Strategic Laboratory | Claudio Tavares Sacchi, Claudia Regina Gonçalves, Erica Valessa Ramos Gomes, Karoline Rodrigues Campos                                                                                                                                    |
| EPI_ISL_755652                                                                                                                                                                                                                                                                                                                                                                                                                                                                                                                                                                                 |           | Lab LOC - Itapeperica da Serra                                                                      | Instituto Adolfo Lutz, Interdisciplinary Procedures Center, Strategic Laboratory | Claudio Tavares Sacchi, Claudia Regina Gonçalves, Erica Valessa Ramos Gomes, Karoline Rodrigues Campos                                                                                                                                    |
| EPI_ISL_755653, EPI_ISL_755654                                                                                                                                                                                                                                                                                                                                                                                                                                                                                                                                                                 |           | Instituto Adolfo Lutz - Central                                                                     | Instituto Adolfo Lutz, Interdisciplinary Procedures Center, Strategic Laboratory | Claudio Tavares Sacchi, Claudia Regina Gonçalves, Erica Valessa Ramos Gomes, Karoline Rodrigues Campos                                                                                                                                    |
| EPI_ISL_755655                                                                                                                                                                                                                                                                                                                                                                                                                                                                                                                                                                                 |           | Instituto Adolfo Lutz - Regional de Campinas                                                        | Instituto Adolfo Lutz, Interdisciplinary Procedures Center,                      | Claudio Tavares Sacchi, Claudia Regina Gonçalves, Erica Valessa Ramos Gomes, Karoline Rodrigues Campos                                                                                                                                    |

| EPI_ISL                                                                                                                                                                                                                                                                                                                                                                                                                                                                                                                                                                                                                                        | Country        | Institution                                                                                                        | Principal Investigator                                                                                                                                                                          | Co-Investigator                                                                                                                                                                                                                                                                                                                                                                                                                                                                                        |
|------------------------------------------------------------------------------------------------------------------------------------------------------------------------------------------------------------------------------------------------------------------------------------------------------------------------------------------------------------------------------------------------------------------------------------------------------------------------------------------------------------------------------------------------------------------------------------------------------------------------------------------------|----------------|--------------------------------------------------------------------------------------------------------------------|-------------------------------------------------------------------------------------------------------------------------------------------------------------------------------------------------|--------------------------------------------------------------------------------------------------------------------------------------------------------------------------------------------------------------------------------------------------------------------------------------------------------------------------------------------------------------------------------------------------------------------------------------------------------------------------------------------------------|
| EPI_ISL_756294                                                                                                                                                                                                                                                                                                                                                                                                                                                                                                                                                                                                                                 | Brazil         | Center for Biotechnology and Cell Therapy, São Rafael Hospital, Salvador, Brazil                                   | Center for Biotechnology and Cell Therapy, São Rafael Hospital, Salvador, Brazil                                                                                                                | Carolina Kymie Vasques Nonaka, Marília Miranda Franco, Tiago Gráf, Ana Verena Almeida Mendes, Renato Santana de Aguiar, Marta Giovanetti, Bruno Solano de Freitas Souza                                                                                                                                                                                                                                                                                                                                |
| EPI_ISL_760963                                                                                                                                                                                                                                                                                                                                                                                                                                                                                                                                                                                                                                 | United Kingdom | Lighthouse Lab in Milton Keynes                                                                                    | Wellcome Sanger Institute for the COVID-19 Genomics UK (COG-UK) Consortium                                                                                                                      | The Lighthouse Lab in Milton Keynes and Alex Alderton, Roberto Amato, Sonia Goncalves, Ewan Harrison, David K. Jackson, Ian Johnston, Dominic Kwiatkowski, Cordelia Langford, John Sillitoe on behalf of the Wellcome Sanger Institute COVID-19 Surveillance Team                                                                                                                                                                                                                                      |
| EPI_ISL_763074, EPI_ISL_763075                                                                                                                                                                                                                                                                                                                                                                                                                                                                                                                                                                                                                 | Brazil         | Diagnosticos da America - DASA                                                                                     | Instituto Adolfo Lutz, Interdisciplinary Procedures Center, Strategic Laboratory                                                                                                                | Claudio Tavares Sacchi, Claudia Regina Gonçalves, Erica Valessa Ramos Gomes, Karoline Rodrigues Campos                                                                                                                                                                                                                                                                                                                                                                                                 |
| EPI_ISL_765648                                                                                                                                                                                                                                                                                                                                                                                                                                                                                                                                                                                                                                 | USA            | Massachusetts General Hospital                                                                                     | Infectious Disease Program, Broad Institute of Harvard and MIT                                                                                                                                  | Lemieux, J.E., Siddle, K.J., Shaw, B., Adams, G., Pierce, V., Turbett, S., Anahtar, M., Branda, J., Slater, D., Harris, J., Lin, A.E., Gladden-Young, A., Lagerborg, K., Rudy, M., DeRuff, K., Carter, A., Normandin, E., Bauer, M., Reilly, S., Tomkins-Tinch, C., Loreth, C., Chaluvadi, S., Neumann, A., Cusick, C., Chapman, S.B., Gnirke, A., Flowers, K., Cerrato, F., Birren, B.W., Gallagher, G., Smole, S., Park, D.J., MacInnis, B.L., Ryan, E., LaRoque, R., Rosenberg, E. and Sabeti, P.C. |
| EPI_ISL_768654                                                                                                                                                                                                                                                                                                                                                                                                                                                                                                                                                                                                                                 | Brazil         | Pathogen Genomics Center, National Institute of Infectious Diseases                                                | Pathogen Genomics Center, National Institute of Infectious Diseases                                                                                                                             | Tsuyoshi Sekizuka, Kentaro Itokawa, Rina Tanaka, Masanori Hashino, Makoto Kuroda                                                                                                                                                                                                                                                                                                                                                                                                                       |
| EPI_ISL_770551, EPI_ISL_770552, EPI_ISL_770555, EPI_ISL_770557, EPI_ISL_770562, EPI_ISL_770565, EPI_ISL_770566, EPI_ISL_770567, EPI_ISL_770568, EPI_ISL_770569, EPI_ISL_770572, EPI_ISL_770573, EPI_ISL_770575, EPI_ISL_770576, EPI_ISL_770577, EPI_ISL_770578, EPI_ISL_770580, EPI_ISL_770585, EPI_ISL_770587, EPI_ISL_770589, EPI_ISL_770597, EPI_ISL_770599, EPI_ISL_770600, EPI_ISL_770601, EPI_ISL_770608, EPI_ISL_770609, EPI_ISL_770610, EPI_ISL_770611, EPI_ISL_770612, EPI_ISL_770614, EPI_ISL_770615, EPI_ISL_770618, EPI_ISL_770629                                                                                                 | Brazil         | Laboratório de Microbiologia Molecular - Universidade FEEVALE                                                      | Bioinformatics Laboratory / LNCC                                                                                                                                                                | Felipe Benites, Fernando Rosado Spilki, Alana Witt Hansen, Juliane Deise Fleck, Juliana Schons, Meriane Demoliner, Ana Karolina Eisen Antunes, Fagner Henrique Heldt, Larissa Mallmann, Bruna Hermann, Ana Luiza Ziulkoski, Vyctoria Goes, Karoline Schallenberg, Matheus Nunes Weber, Paula Rodrigues de Almeida, Alessandra Pavan Lamarca da Silva, Ronaldo da Silva Jr., Luiz G P de Almeida, Alexandra L Gerber, Ana Paula de C Guimarães, Ana Tereza R de Vasconcelos                             |
| EPI_ISL_776199                                                                                                                                                                                                                                                                                                                                                                                                                                                                                                                                                                                                                                 | Germany        | University Medical Center Hamburg Eppendorf                                                                        | Heinrich Pette Institute, Leibniz Institute for Experimental Virology                                                                                                                           | Alexis Robitaille, Thomas Günther, Johannes Knobloch, Martin Aepfelbacher, Nicole Fischer, Adam Grundhoff                                                                                                                                                                                                                                                                                                                                                                                              |
| EPI_ISL_776754                                                                                                                                                                                                                                                                                                                                                                                                                                                                                                                                                                                                                                 | Brazil         | Instituto Adolfo Lutz - Central                                                                                    | Instituto Adolfo Lutz, Interdisciplinary Procedures Center, Strategic Laboratory                                                                                                                | Claudio Tavares Sacchi, Claudia Regina Gonçalves, Erica Valessa Ramos Gomes, Karoline Rodrigues Campos                                                                                                                                                                                                                                                                                                                                                                                                 |
| EPI_ISL_776757                                                                                                                                                                                                                                                                                                                                                                                                                                                                                                                                                                                                                                 | Brazil         | Instituto Adolfo Lutz - Regional de Marília                                                                        | Instituto Adolfo Lutz, Interdisciplinary Procedures Center, Strategic Laboratory                                                                                                                | Claudio Tavares Sacchi, Claudia Regina Gonçalves, Erica Valessa Ramos Gomes, Karoline Rodrigues Campos                                                                                                                                                                                                                                                                                                                                                                                                 |
| EPI_ISL_776760                                                                                                                                                                                                                                                                                                                                                                                                                                                                                                                                                                                                                                 | Brazil         | Instituto Adolfo Lutz - Central                                                                                    | Instituto Adolfo Lutz, Interdisciplinary Procedures Center, Strategic Laboratory                                                                                                                | Claudio Tavares Sacchi, Claudia Regina Gonçalves, Erica Valessa Ramos Gomes, Karoline Rodrigues Campos                                                                                                                                                                                                                                                                                                                                                                                                 |
| EPI_ISL_776765, EPI_ISL_776766                                                                                                                                                                                                                                                                                                                                                                                                                                                                                                                                                                                                                 | Brazil         | Instituto Adolfo Lutz - Regional de Santo Andre                                                                    | Instituto Adolfo Lutz, Interdisciplinary Procedures Center, Strategic Laboratory                                                                                                                | Claudio Tavares Sacchi, Claudia Regina Gonçalves, Erica Valessa Ramos Gomes, Karoline Rodrigues Campos                                                                                                                                                                                                                                                                                                                                                                                                 |
| EPI_ISL_776767                                                                                                                                                                                                                                                                                                                                                                                                                                                                                                                                                                                                                                 | Brazil         | Instituto Adolfo Lutz - Regional de Marília                                                                        | Instituto Adolfo Lutz, Interdisciplinary Procedures Center, Strategic Laboratory                                                                                                                | Claudio Tavares Sacchi, Claudia Regina Gonçalves, Erica Valessa Ramos Gomes, Karoline Rodrigues Campos                                                                                                                                                                                                                                                                                                                                                                                                 |
| EPI_ISL_776769                                                                                                                                                                                                                                                                                                                                                                                                                                                                                                                                                                                                                                 | Brazil         | Instituto Adolfo Lutz - Regional de Santo Andre                                                                    | Instituto Adolfo Lutz, Interdisciplinary Procedures Center, Strategic Laboratory                                                                                                                | Claudio Tavares Sacchi, Claudia Regina Gonçalves, Erica Valessa Ramos Gomes, Karoline Rodrigues Campos                                                                                                                                                                                                                                                                                                                                                                                                 |
| EPI_ISL_779155, EPI_ISL_779156, EPI_ISL_779157, EPI_ISL_779159, EPI_ISL_779160, EPI_ISL_779161, EPI_ISL_779162, EPI_ISL_779168                                                                                                                                                                                                                                                                                                                                                                                                                                                                                                                 | Brazil         | Laboratório de Microbiologia Molecular - Universidade FEEVALE                                                      | Bioinformatics Laboratory / LNCC                                                                                                                                                                | Felipe Benites, Fernando Rosado Spilki, Alana Witt Hansen, Juliane Deise Fleck, Juliana Schons, Meriane Demoliner, Ana Karolina Eisen Antunes, Fagner Henrique Heldt, Larissa Mallmann, Bruna Hermann, Ana Luiza Ziulkoski, Vyctoria Goes, Karoline Schallenberg, Matheus Nunes Weber, Paula Rodrigues de Almeida, Alessandra Pavan Lamarca da Silva, Ronaldo da Silva Jr., Luiz G P de Almeida, Alexandra L Gerber, Ana Paula de C Guimarães, Ana Tereza R de Vasconcelos                             |
| EPI_ISL_779207                                                                                                                                                                                                                                                                                                                                                                                                                                                                                                                                                                                                                                 | Brazil         | Pathogen Genomics Center, National Institute of Infectious Diseases                                                | Pathogen Genomics Center, National Institute of Infectious Diseases                                                                                                                             | Tsuyoshi Sekizuka, Kentaro Itokawa, Rina Tanaka, Masanori Hashino, Makoto Kuroda                                                                                                                                                                                                                                                                                                                                                                                                                       |
| EPI_ISL_792104, EPI_ISL_792109, EPI_ISL_792114                                                                                                                                                                                                                                                                                                                                                                                                                                                                                                                                                                                                 | Brazil         | Instituto Adolfo Lutz - Central                                                                                    | Instituto Adolfo Lutz, Interdisciplinary Procedures Center, Strategic Laboratory                                                                                                                | Claudio Tavares Sacchi, Claudia Regina Gonçalves, Erica Valessa Ramos Gomes, Karoline Rodrigues Campos                                                                                                                                                                                                                                                                                                                                                                                                 |
| EPI_ISL_792116                                                                                                                                                                                                                                                                                                                                                                                                                                                                                                                                                                                                                                 | Brazil         | Instituto Adolfo Lutz - Regional de Taubate                                                                        | Instituto Adolfo Lutz, Interdisciplinary Procedures Center, Strategic Laboratory                                                                                                                | Claudio Tavares Sacchi, Claudia Regina Gonçalves, Erica Valessa Ramos Gomes, Karoline Rodrigues Campos                                                                                                                                                                                                                                                                                                                                                                                                 |
| EPI_ISL_792309                                                                                                                                                                                                                                                                                                                                                                                                                                                                                                                                                                                                                                 | Argentina      | Laboratorio del Hospital El Cruce Dr. Néstor C. Kirchner                                                           | Área de Secuenciación del Laboratorio de Virología del Hospital de Niños Dr. Ricardo Gutiérrez on behalf of 'Proyecto Argentino Interinstitucional de genómica de SARS-CoV-2' (PAIS Consortium) | Nabaes Jodar, MS; Goya, S; Natale, MI; Lusso, S; Zubieta, M; Rahhal, M; Valinotto, LE; Viegas, M.                                                                                                                                                                                                                                                                                                                                                                                                      |
| EPI_ISL_792561, EPI_ISL_792562, EPI_ISL_792563, EPI_ISL_792565, EPI_ISL_792566, EPI_ISL_792567, EPI_ISL_792568, EPI_ISL_792570, EPI_ISL_792571, EPI_ISL_792575, EPI_ISL_792593, EPI_ISL_792594, EPI_ISL_792595, EPI_ISL_792596, EPI_ISL_792597, EPI_ISL_792599, EPI_ISL_792602, EPI_ISL_792603, EPI_ISL_792604, EPI_ISL_792605, EPI_ISL_792606, EPI_ISL_792607, EPI_ISL_792608, EPI_ISL_792609, EPI_ISL_792610, EPI_ISL_792611, EPI_ISL_792612, EPI_ISL_792614, EPI_ISL_792621, EPI_ISL_792622, EPI_ISL_792623, EPI_ISL_792624, EPI_ISL_792627, EPI_ISL_792629, EPI_ISL_792630, EPI_ISL_792631, EPI_ISL_792632, EPI_ISL_792633, EPI_ISL_792635 | Brazil         | Laboratório Central de Saúde Pública do Estado da Paraíba (LACEN-PB)                                               | Laboratory of Respiratory Viruses and Measles, Oswaldo Cruz Institute, FIOCRUZ                                                                                                                  | Paola Resende, Luciana Appolinario, Fernando Motta, Anna Carolina Paixao, Ana Carolina Mendonca, João Felipe Bezerra, Romero Henrique Teixeira de Vasconcelos, Dalane Loudal Florentino Teixeira, Thiago Franco de Oliveira Carneiro, Marilda Siqueira on behalf of the FioCruz COVID-19 Genomic Surveillance Network                                                                                                                                                                                  |
| EPI_ISL_792641, EPI_ISL_792642, EPI_ISL_792643, EPI_ISL_792644                                                                                                                                                                                                                                                                                                                                                                                                                                                                                                                                                                                 | Brazil         | Laboratório Central de Saúde Pública do Estado de Alagoas (LACEN-AL)                                               | Laboratory of Respiratory Viruses and Measles, Oswaldo Cruz Institute, FIOCRUZ                                                                                                                  | Paola Resende, Luciana Appolinario, Fernando Motta, Anna Carolina Paixao, Ana Carolina Mendonca, Anderson Brandao Leite, Marilda Siqueira on behalf of the FioCruz COVID-19 Genomic Surveillance Network                                                                                                                                                                                                                                                                                               |
| EPI_ISL_792645, EPI_ISL_792646, EPI_ISL_792648, EPI_ISL_792649, EPI_ISL_792650, EPI_ISL_792651, EPI_ISL_792654                                                                                                                                                                                                                                                                                                                                                                                                                                                                                                                                 | Brazil         | Laboratório Central de Saúde Pública do Estado do Paraná (LACEN-PR)                                                | Laboratory of Respiratory Viruses and Measles, Oswaldo Cruz Institute, FIOCRUZ                                                                                                                  | Paola Resende, Luciana Appolinario, Fernando Motta, Anna Carolina Paixao, Ana Carolina Mendonca, Maria do Carmo Debur, Irina Nastassja Riediger, Marilda Siqueira on behalf of the FioCruz COVID-19 Genomic Surveillance Network                                                                                                                                                                                                                                                                       |
| EPI_ISL_801386, EPI_ISL_801387, EPI_ISL_801390, EPI_ISL_801394, EPI_ISL_801396                                                                                                                                                                                                                                                                                                                                                                                                                                                                                                                                                                 | Brazil         | Laboratorio de Ecologia de Doencas Transmissíveis na Amazonia, Instituto Leonidas e Maria Deane - Fiocruz Amazonia | Laboratorio de Ecologia de Doencas Transmissíveis na Amazonia, Instituto Leonidas e Maria Deane - Fiocruz Amazonia                                                                              | Valdinete Nascimento, Victor Souza, André Corado, Fernanda Nascimento, George Silva, Ágatha Costa, Debora Duarte, Luciana Gonçalves, Maria Júlia Brandão, Michele Jesus, Felipe Naveca                                                                                                                                                                                                                                                                                                                 |
| EPI_ISL_801397, EPI_ISL_801399, EPI_ISL_801400, EPI_ISL_801401, EPI_ISL_801402, EPI_ISL_801403                                                                                                                                                                                                                                                                                                                                                                                                                                                                                                                                                 | Brazil         | Laboratório Central de Saúde Pública do Amazonas - LACEN-AM                                                        | Laboratorio de Ecologia de Doencas Transmissíveis na Amazonia, Instituto Leonidas e Maria Deane - Fiocruz Amazonia                                                                              | Valdinete Nascimento, Victor Souza, André Corado, Fernanda Nascimento, George Silva, Ágatha Costa, Debora Duarte, Luciana Gonçalves, Maria Júlia Brandão, Michele Jesus, Felipe Naveca                                                                                                                                                                                                                                                                                                                 |
| EPI_ISL_803887                                                                                                                                                                                                                                                                                                                                                                                                                                                                                                                                                                                                                                 | Italy          | Department of Medical Biotechnologies, University of Siena                                                         | Laboratory of Infectious Diseases, Department of Biomedical and Clinical Sciences L. Sacco, University of Milan                                                                                 | Ilaria Vicenti, Filippo Dragoni, Maurizio Zazzi, Maria Grazia Cusi, Alessia Lai, Annalisa Bergna, Carla Della Ventura, Claudia Balotta, Massimo Galli, Gianguglielmo Zehender on behalf of SARS-CoV-2 ITALIAN RESEARCH ENTERPRISE-(SCIRE) Collaborative Group                                                                                                                                                                                                                                          |
| EPI_ISL_804814, EPI_ISL_804815, EPI_ISL_804816, EPI_ISL_804817, EPI_ISL_804818, EPI_ISL_804819, EPI_ISL_804820, EPI_ISL_804822, EPI_ISL_804823, EPI_ISL_804824, EPI_ISL_804825, EPI_ISL_804826, EPI_ISL_804827, EPI_ISL_804828, EPI_ISL_804829, EPI_ISL_804830                                                                                                                                                                                                                                                                                                                                                                                 | Brazil         | DB Diagnosticos do Brasil                                                                                          | Laboratório de Parasitologia Médica - Instituto de Medicina Tropical - Universidade de São Paulo                                                                                                | Nuno Faria, Ingra Moraes Claro, Darlan Candido, Lucas A. Moyses Franco, Pamela dos Santos Andrade, Thais de Moura Coletti, Camila A. Maia da Silva, Flavia Cristina Sales, Erika Regina Manuili, Renato A. Santana, Nelson Gaburo, Cecília da Cunha Camilo, Nelson Abraham Fraiji, Myuki Alfaia Esashika Crispim, Maria do Perpétuo Socorro Sampaio Carvalho, Andrew Rambaut, Nick Loman, Oliver G. Pybus, Ester C. Sabino; DB; HEMOAM; CDL; CADDE Genomic Network.                                    |
| EPI_ISL_811148                                                                                                                                                                                                                                                                                                                                                                                                                                                                                                                                                                                                                                 | Brazil         | Laboratorio de Ecologia de Doencas Transmissíveis na Amazonia, Instituto Leonidas e Maria Deane - Fiocruz          | Laboratorio de Ecologia de Doencas Transmissíveis na Amazonia, Instituto Leonidas e Maria Deane - Fiocruz                                                                                       | Valdinete Nascimento, Victor Souza, André Corado, Fernanda Nascimento, George Silva, Ágatha Costa, Debora Duarte, Luciana Gonçalves, Matilde Mejia, Karina Pessoa, Maria Júlia Brandão, Michele Jesus, Felipe Naveca                                                                                                                                                                                                                                                                                   |

|                                                                                                                                                                                                                                                                                                                                                                                                                                                | Amazonia                                                                                                           | Amazonia                                                                                                           |                                                                                                                                                                                                                                                                  |
|------------------------------------------------------------------------------------------------------------------------------------------------------------------------------------------------------------------------------------------------------------------------------------------------------------------------------------------------------------------------------------------------------------------------------------------------|--------------------------------------------------------------------------------------------------------------------|--------------------------------------------------------------------------------------------------------------------|------------------------------------------------------------------------------------------------------------------------------------------------------------------------------------------------------------------------------------------------------------------|
| EPI_ISL_831474, EPI_ISL_831645, EPI_ISL_831681, EPI_ISL_831683, EPI_ISL_831688, EPI_ISL_831689, EPI_ISL_831892, EPI_ISL_831898, EPI_ISL_831913, EPI_ISL_831939, EPI_ISL_832010, EPI_ISL_832012, EPI_ISL_832013                                                                                                                                                                                                                                 |                                                                                                                    |                                                                                                                    |                                                                                                                                                                                                                                                                  |
| see above                                                                                                                                                                                                                                                                                                                                                                                                                                      | Laboratório de Microbiologia Molecular - Universidade FEEVALE                                                      | Universidade Federal de Ciências da Saúde de Porto Alegre                                                          | Vinicius Bonetti Franceschi, Amanda de Menezes Mayer, Gabriel Dickin Caldana, Carla Andretta Moreira Neves, Patrícia Aline Gröhs Ferrareze, Gabriela Bettella Cybis, Ricardo Ariel Zimmerman, Livia Kmetzsch, Fernando Rosado Spilki, Claudia Elizabeth Thompson |
| EPI_ISL_833131, EPI_ISL_833137                                                                                                                                                                                                                                                                                                                                                                                                                 | Laboratorio de Ecologia de Doencas Transmissíveis na Amazonia, Instituto Leonidas e Maria Deane - Fiocruz Amazonia | Laboratorio de Ecologia de Doencas Transmissíveis na Amazonia, Instituto Leonidas e Maria Deane - Fiocruz Amazonia | Valdinete Nascimento, Victor Souza, André Corado, Fernanda Nascimento, George Silva, Ágatha Costa, Debora Duarte, Karina Pessoa, Matilde Mejia, Luciana Gonçalves, Maria Júlia Brandão, Michele Jesus, Felipe Naveca                                             |
| EPI_ISL_833156                                                                                                                                                                                                                                                                                                                                                                                                                                 | Instituto Adolfo Lutz - Regional de Sorocaba                                                                       | Instituto Adolfo Lutz, Interdisciplinary Procedures Center, Strategic Laboratory                                   | Claudio Tavares Sacchi, Claudia Regina Gonçalves, Erica Valessa Ramos Gomes, Karoline Rodrigues Campos                                                                                                                                                           |
| EPI_ISL_833157, EPI_ISL_833158                                                                                                                                                                                                                                                                                                                                                                                                                 | Instituto Adolfo Lutz - Regional de Santo Andre                                                                    | Instituto Adolfo Lutz, Interdisciplinary Procedures Center, Strategic Laboratory                                   | Claudio Tavares Sacchi, Claudia Regina Gonçalves, Erica Valessa Ramos Gomes, Karoline Rodrigues Campos                                                                                                                                                           |
| EPI_ISL_833159                                                                                                                                                                                                                                                                                                                                                                                                                                 | Instituto Adolfo Lutz - Central                                                                                    | Instituto Adolfo Lutz, Interdisciplinary Procedures Center, Strategic Laboratory                                   | Claudio Tavares Sacchi, Claudia Regina Gonçalves, Erica Valessa Ramos Gomes, Karoline Rodrigues Campos                                                                                                                                                           |
| EPI_ISL_833160                                                                                                                                                                                                                                                                                                                                                                                                                                 | Instituto Adolfo Lutz - Regional de Santo Andre                                                                    | Instituto Adolfo Lutz, Interdisciplinary Procedures Center, Strategic Laboratory                                   | Claudio Tavares Sacchi, Claudia Regina Gonçalves, Erica Valessa Ramos Gomes, Karoline Rodrigues Campos                                                                                                                                                           |
| EPI_ISL_833162                                                                                                                                                                                                                                                                                                                                                                                                                                 | Lab LOC - Itapeperica da Serra                                                                                     | Instituto Adolfo Lutz, Interdisciplinary Procedures Center, Strategic Laboratory                                   | Claudio Tavares Sacchi, Claudia Regina Gonçalves, Erica Valessa Ramos Gomes, Karoline Rodrigues Campos                                                                                                                                                           |
| EPI_ISL_833163                                                                                                                                                                                                                                                                                                                                                                                                                                 | Instituto Adolfo Lutz - Regional de Marília                                                                        | Instituto Adolfo Lutz, Interdisciplinary Procedures Center, Strategic Laboratory                                   | Claudio Tavares Sacchi, Claudia Regina Gonçalves, Erica Valessa Ramos Gomes, Karoline Rodrigues Campos                                                                                                                                                           |
| EPI_ISL_833165, EPI_ISL_833166                                                                                                                                                                                                                                                                                                                                                                                                                 | Hospital Samaritano                                                                                                | Instituto Adolfo Lutz, Interdisciplinary Procedures Center, Strategic Laboratory                                   | Claudio Tavares Sacchi, Claudia Regina Gonçalves, Erica Valessa Ramos Gomes, Karoline Rodrigues Campos                                                                                                                                                           |
| EPI_ISL_833167, EPI_ISL_833168, EPI_ISL_833175                                                                                                                                                                                                                                                                                                                                                                                                 | DB Diagnosticos do Brasil                                                                                          | Instituto Adolfo Lutz, Interdisciplinary Procedures Center, Strategic Laboratory                                   | Claudio Tavares Sacchi, Claudia Regina Gonçalves, Erica Valessa Ramos Gomes, Karoline Rodrigues Campos                                                                                                                                                           |
| EPI_ISL_833376, EPI_ISL_833384                                                                                                                                                                                                                                                                                                                                                                                                                 | National Public Health Laboratory, National Centre for Infectious Diseases                                         | National Public Health Laboratory, National Centre for Infectious Diseases                                         | Tze Minn Mak, Sophie Octavia, Zhenyang Zhou, Lin Cui, Raymond Tzer Pin Lin                                                                                                                                                                                       |
| EPI_ISL_836143                                                                                                                                                                                                                                                                                                                                                                                                                                 | Hospital de Campanha COVID-19 de Mairipora                                                                         | Instituto Adolfo Lutz, Interdisciplinary Procedures Center, Strategic Laboratory                                   | Claudio Tavares Sacchi, Claudia Regina Gonçalves, Erica Valessa Ramos Gomes, Karoline Rodrigues Campos                                                                                                                                                           |
| EPI_ISL_836977                                                                                                                                                                                                                                                                                                                                                                                                                                 | Hospital Municipal Dr. Jose de Carvalho Florence                                                                   | Instituto Adolfo Lutz, Interdisciplinary Procedures Center, Strategic Laboratory                                   | Claudio Tavares Sacchi, Claudia Regina Gonçalves, Erica Valessa Ramos Gomes, Karoline Rodrigues Campos                                                                                                                                                           |
| EPI_ISL_836978                                                                                                                                                                                                                                                                                                                                                                                                                                 | Irmandade da Santa Casa de Misericordia de Lorena                                                                  | Instituto Adolfo Lutz, Interdisciplinary Procedures Center, Strategic Laboratory                                   | Claudio Tavares Sacchi, Claudia Regina Gonçalves, Erica Valessa Ramos Gomes, Karoline Rodrigues Campos                                                                                                                                                           |
| EPI_ISL_837053                                                                                                                                                                                                                                                                                                                                                                                                                                 | UBS Darcy Alves e Robalinho                                                                                        | Instituto Adolfo Lutz, Interdisciplinary Procedures Center, Strategic Laboratory                                   | Claudio Tavares Sacchi, Claudia Regina Gonçalves, Erica Valessa Ramos Gomes, Karoline Rodrigues Campos                                                                                                                                                           |
| EPI_ISL_837054                                                                                                                                                                                                                                                                                                                                                                                                                                 | UBS Jose Sabino Ferreira                                                                                           | Instituto Adolfo Lutz, Interdisciplinary Procedures Center, Strategic Laboratory                                   | Claudio Tavares Sacchi, Claudia Regina Gonçalves, Erica Valessa Ramos Gomes, Karoline Rodrigues Campos                                                                                                                                                           |
| EPI_ISL_848555, EPI_ISL_848556, EPI_ISL_848560, EPI_ISL_848561, EPI_ISL_848563, EPI_ISL_848566, EPI_ISL_848567, EPI_ISL_848568, EPI_ISL_848569, EPI_ISL_848573, EPI_ISL_848574, EPI_ISL_848578, EPI_ISL_848579, EPI_ISL_848584, EPI_ISL_848589, EPI_ISL_848594, EPI_ISL_848596, EPI_ISL_848599, EPI_ISL_848602, EPI_ISL_848608, EPI_ISL_848610, EPI_ISL_848611, EPI_ISL_848612, EPI_ISL_848614, EPI_ISL_848616, EPI_ISL_848621, EPI_ISL_848623 |                                                                                                                    |                                                                                                                    |                                                                                                                                                                                                                                                                  |
| see above                                                                                                                                                                                                                                                                                                                                                                                                                                      | Evandro Chagas Institute                                                                                           | Evandro Chagas Institute                                                                                           | Santos, M.C.; Silva, A.M.; Junior, W.D.C.; Barbagelata, L.S.; Ferreira, J.A.; Sousa, E.M.A.; da Silva, P.S.; Pinheiro, K.C.; L.C.; Sousa Junior, E.C.                                                                                                            |
| EPI_ISL_860633                                                                                                                                                                                                                                                                                                                                                                                                                                 | Instituto Adolfo Lutz - Regional de Sorocaba                                                                       | Instituto Adolfo Lutz, Interdisciplinary Procedures Center, Strategic Laboratory                                   | Claudio Tavares Sacchi, Claudia Regina Gonçalves, Erica Valessa Ramos Gomes, Karoline Rodrigues Campos                                                                                                                                                           |
| EPI_ISL_861627, EPI_ISL_861630                                                                                                                                                                                                                                                                                                                                                                                                                 | Instituto Adolfo Lutz - Central                                                                                    | Instituto Adolfo Lutz, Interdisciplinary Procedures Center, Strategic Laboratory                                   | Claudio Tavares Sacchi, Claudia Regina Gonçalves, Erica Valessa Ramos Gomes, Karoline Rodrigues Campos                                                                                                                                                           |
| EPI_ISL_861637                                                                                                                                                                                                                                                                                                                                                                                                                                 | Hospital Nipo Brasileiro                                                                                           | Instituto Adolfo Lutz, Interdisciplinary Procedures Center, Strategic Laboratory                                   | Claudio Tavares Sacchi, Claudia Regina Gonçalves, Erica Valessa Ramos Gomes, Karoline Rodrigues Campos                                                                                                                                                           |
| EPI_ISL_861645                                                                                                                                                                                                                                                                                                                                                                                                                                 | Hospital e Pronto Socorro Comunitario Vila Iolanda                                                                 | Instituto Adolfo Lutz, Interdisciplinary Procedures Center, Strategic Laboratory                                   | Claudio Tavares Sacchi, Claudia Regina Gonçalves, Erica Valessa Ramos Gomes, Karoline Rodrigues Campos                                                                                                                                                           |
| EPI_ISL_861646, EPI_ISL_861647, EPI_ISL_861650                                                                                                                                                                                                                                                                                                                                                                                                 | Hospital Santa Marcelina Sao Paulo                                                                                 | Instituto Adolfo Lutz, Interdisciplinary Procedures Center, Strategic Laboratory                                   | Claudio Tavares Sacchi, Claudia Regina Gonçalves, Erica Valessa Ramos Gomes, Karoline Rodrigues Campos                                                                                                                                                           |
| EPI_ISL_861651                                                                                                                                                                                                                                                                                                                                                                                                                                 | AMA Jardim Brasil                                                                                                  | Instituto Adolfo Lutz, Interdisciplinary Procedures Center, Strategic Laboratory                                   | Claudio Tavares Sacchi, Claudia Regina Gonçalves, Erica Valessa Ramos Gomes, Karoline Rodrigues Campos                                                                                                                                                           |
| EPI_ISL_861652                                                                                                                                                                                                                                                                                                                                                                                                                                 | AMA Wamberto Dias da Costa                                                                                         | Instituto Adolfo Lutz, Interdisciplinary Procedures Center, Strategic Laboratory                                   | Claudio Tavares Sacchi, Claudia Regina Gonçalves, Erica Valessa Ramos Gomes, Karoline Rodrigues Campos                                                                                                                                                           |
| EPI_ISL_861653                                                                                                                                                                                                                                                                                                                                                                                                                                 | Hospital Santa Virgínia                                                                                            | Instituto Adolfo Lutz, Interdisciplinary Procedures Center, Strategic Laboratory                                   | Claudio Tavares Sacchi, Claudia Regina Gonçalves, Erica Valessa Ramos Gomes, Karoline Rodrigues Campos                                                                                                                                                           |
| EPI_ISL_861654, EPI_ISL_861655                                                                                                                                                                                                                                                                                                                                                                                                                 | Hospital Santa Marcelina Sao Paulo                                                                                 | Instituto Adolfo Lutz, Interdisciplinary Procedures Center, Strategic Laboratory                                   | Claudio Tavares Sacchi, Claudia Regina Gonçalves, Erica Valessa Ramos Gomes, Karoline Rodrigues Campos                                                                                                                                                           |
| EPI_ISL_861657                                                                                                                                                                                                                                                                                                                                                                                                                                 | Hospital e Maternidade Sino Brasileiro                                                                             | Instituto Adolfo Lutz, Interdisciplinary Procedures Center, Strategic Laboratory                                   | Claudio Tavares Sacchi, Claudia Regina Gonçalves, Erica Valessa Ramos Gomes, Karoline Rodrigues Campos                                                                                                                                                           |
| EPI_ISL_861658                                                                                                                                                                                                                                                                                                                                                                                                                                 | Hospital Municipal Antônio Giglio                                                                                  | Instituto Adolfo Lutz, Interdisciplinary Procedures Center, Strategic Laboratory                                   | Claudio Tavares Sacchi, Claudia Regina Gonçalves, Erica Valessa Ramos Gomes, Karoline Rodrigues Campos                                                                                                                                                           |
| EPI_ISL_861659, EPI_ISL_861661                                                                                                                                                                                                                                                                                                                                                                                                                 | PS e Maternidade Nair Fonseca Leitao Arantes                                                                       | Instituto Adolfo Lutz, Interdisciplinary Procedures Center, Strategic Laboratory                                   | Claudio Tavares Sacchi, Claudia Regina Gonçalves, Erica Valessa Ramos Gomes, Karoline Rodrigues Campos                                                                                                                                                           |
| EPI_ISL_861662                                                                                                                                                                                                                                                                                                                                                                                                                                 | CS I Tacito Leite de Carvalho e Silva                                                                              | Instituto Adolfo Lutz, Interdisciplinary Procedures Center, Strategic Laboratory                                   | Claudio Tavares Sacchi, Claudia Regina Gonçalves, Erica Valessa Ramos Gomes, Karoline Rodrigues Campos                                                                                                                                                           |
| EPI_ISL_861663                                                                                                                                                                                                                                                                                                                                                                                                                                 | Instituto Adolfo Lutz - Central                                                                                    | Instituto Adolfo Lutz, Interdisciplinary Procedures Center, Strategic Laboratory                                   | Claudio Tavares Sacchi, Claudia Regina Gonçalves, Erica Valessa Ramos Gomes, Karoline Rodrigues Campos                                                                                                                                                           |
| EPI_ISL_861665                                                                                                                                                                                                                                                                                                                                                                                                                                 | Instituto Adolfo Lutz - Regional de Taubate                                                                        | Instituto Adolfo Lutz, Interdisciplinary Procedures Center, Strategic Laboratory                                   | Claudio Tavares Sacchi, Claudia Regina Gonçalves, Erica Valessa Ramos Gomes, Karoline Rodrigues Campos                                                                                                                                                           |
| EPI_ISL_861666                                                                                                                                                                                                                                                                                                                                                                                                                                 | PSF Dr. Antonio Pires de Almeida                                                                                   | Instituto Adolfo Lutz, Interdisciplinary Procedures Center, Strategic Laboratory                                   | Claudio Tavares Sacchi, Claudia Regina Gonçalves, Erica Valessa Ramos Gomes, Karoline Rodrigues Campos                                                                                                                                                           |

|                                                                                                                                                                                                                                                                                                                                                                                                |                                                                               |                                                                                  |                                                                                                                                                                                                    |
|------------------------------------------------------------------------------------------------------------------------------------------------------------------------------------------------------------------------------------------------------------------------------------------------------------------------------------------------------------------------------------------------|-------------------------------------------------------------------------------|----------------------------------------------------------------------------------|----------------------------------------------------------------------------------------------------------------------------------------------------------------------------------------------------|
| EPI_ISL_861667                                                                                                                                                                                                                                                                                                                                                                                 | Instituto Adolfo Lutz - Regional de Rio Claro                                 | Instituto Adolfo Lutz, Interdisciplinary Procedures Center, Strategic Laboratory | Claudio Tavares Sacchi, Claudia Regina Gonçalves, Erica Valessa Ramos Gomes, Karoline Rodrigues Campos                                                                                             |
| EPI_ISL_861668                                                                                                                                                                                                                                                                                                                                                                                 | Centro de Triagem Covid19                                                     | Instituto Adolfo Lutz, Interdisciplinary Procedures Center, Strategic Laboratory | Claudio Tavares Sacchi, Claudia Regina Gonçalves, Erica Valessa Ramos Gomes, Karoline Rodrigues Campos                                                                                             |
| EPI_ISL_861669                                                                                                                                                                                                                                                                                                                                                                                 | Lab LOC - Itapecerica da Serra                                                | Instituto Adolfo Lutz, Interdisciplinary Procedures Center, Strategic Laboratory | Claudio Tavares Sacchi, Claudia Regina Gonçalves, Erica Valessa Ramos Gomes, Karoline Rodrigues Campos                                                                                             |
| EPI_ISL_861670                                                                                                                                                                                                                                                                                                                                                                                 | Instituto Adolfo Lutz - Regional de Taubate                                   | Instituto Adolfo Lutz, Interdisciplinary Procedures Center, Strategic Laboratory | Claudio Tavares Sacchi, Claudia Regina Gonçalves, Erica Valessa Ramos Gomes, Karoline Rodrigues Campos                                                                                             |
| EPI_ISL_861671                                                                                                                                                                                                                                                                                                                                                                                 | Hospital Municipal Prefeito Waldemar Costa Filho                              | Instituto Adolfo Lutz, Interdisciplinary Procedures Center, Strategic Laboratory | Claudio Tavares Sacchi, Claudia Regina Gonçalves, Erica Valessa Ramos Gomes, Karoline Rodrigues Campos                                                                                             |
| EPI_ISL_861672                                                                                                                                                                                                                                                                                                                                                                                 | Day Hospital de Ermelino Matarazzo                                            | Instituto Adolfo Lutz, Interdisciplinary Procedures Center, Strategic Laboratory | Claudio Tavares Sacchi, Claudia Regina Gonçalves, Erica Valessa Ramos Gomes, Karoline Rodrigues Campos                                                                                             |
| EPI_ISL_861673                                                                                                                                                                                                                                                                                                                                                                                 | PA Novo Osasco                                                                | Instituto Adolfo Lutz, Interdisciplinary Procedures Center, Strategic Laboratory | Claudio Tavares Sacchi, Claudia Regina Gonçalves, Erica Valessa Ramos Gomes, Karoline Rodrigues Campos                                                                                             |
| EPI_ISL_861675                                                                                                                                                                                                                                                                                                                                                                                 | UPA Central de Caraguatatuba                                                  | Instituto Adolfo Lutz, Interdisciplinary Procedures Center, Strategic Laboratory | Claudio Tavares Sacchi, Claudia Regina Gonçalves, Erica Valessa Ramos Gomes, Karoline Rodrigues Campos                                                                                             |
| EPI_ISL_861677                                                                                                                                                                                                                                                                                                                                                                                 | Instituto Adolfo Lutz - Central                                               | Instituto Adolfo Lutz, Interdisciplinary Procedures Center, Strategic Laboratory | Claudio Tavares Sacchi, Claudia Regina Gonçalves, Erica Valessa Ramos Gomes, Karoline Rodrigues Campos                                                                                             |
| EPI_ISL_861678                                                                                                                                                                                                                                                                                                                                                                                 | Laboratorio Municipal de Guarulhos                                            | Instituto Adolfo Lutz, Interdisciplinary Procedures Center, Strategic Laboratory | Claudio Tavares Sacchi, Claudia Regina Gonçalves, Erica Valessa Ramos Gomes, Karoline Rodrigues Campos                                                                                             |
| EPI_ISL_861679                                                                                                                                                                                                                                                                                                                                                                                 | Instituto Adolfo Lutz - Regional de Taubate                                   | Instituto Adolfo Lutz, Interdisciplinary Procedures Center, Strategic Laboratory | Claudio Tavares Sacchi, Claudia Regina Gonçalves, Erica Valessa Ramos Gomes, Karoline Rodrigues Campos                                                                                             |
| EPI_ISL_861681                                                                                                                                                                                                                                                                                                                                                                                 | Hospital Municipal Dr. Waldemar Tebaldi                                       | Instituto Adolfo Lutz, Interdisciplinary Procedures Center, Strategic Laboratory | Claudio Tavares Sacchi, Claudia Regina Gonçalves, Erica Valessa Ramos Gomes, Karoline Rodrigues Campos                                                                                             |
| EPI_ISL_861682                                                                                                                                                                                                                                                                                                                                                                                 | UPA Vila Santa Catarina                                                       | Instituto Adolfo Lutz, Interdisciplinary Procedures Center, Strategic Laboratory | Claudio Tavares Sacchi, Claudia Regina Gonçalves, Erica Valessa Ramos Gomes, Karoline Rodrigues Campos                                                                                             |
| EPI_ISL_861683                                                                                                                                                                                                                                                                                                                                                                                 | Complexo Hospitalar Padre Bento de Guarulhos                                  | Instituto Adolfo Lutz, Interdisciplinary Procedures Center, Strategic Laboratory | Claudio Tavares Sacchi, Claudia Regina Gonçalves, Erica Valessa Ramos Gomes, Karoline Rodrigues Campos                                                                                             |
| EPI_ISL_861867, EPI_ISL_861868, EPI_ISL_861871, EPI_ISL_861872, EPI_ISL_861873, EPI_ISL_861874, EPI_ISL_861876, EPI_ISL_861877, EPI_ISL_861883, EPI_ISL_861884, EPI_ISL_861885, EPI_ISL_861886, EPI_ISL_861887, EPI_ISL_861888, EPI_ISL_861891, EPI_ISL_861893, EPI_ISL_861894, EPI_ISL_861895, EPI_ISL_861898, EPI_ISL_861899, EPI_ISL_861901, EPI_ISL_861907, EPI_ISL_861908, EPI_ISL_861910 |                                                                               |                                                                                  |                                                                                                                                                                                                    |
| see above                                                                                                                                                                                                                                                                                                                                                                                      | LATE - Laboratório de Técnicas Especiais - Hospital Israelita Albert Einstein | LATE - Laboratório de Técnicas Especiais - Hospital Israelita Albert Einstein    | Deyvid Amgarten, Fernanda de Mello Malta, Raquel Riyuzo, Ana Paula Moreira Salles, Pedro Henrique Sebe Rodrigues, João Renato Rebello Pinho                                                        |
| EPI_ISL_861914                                                                                                                                                                                                                                                                                                                                                                                 | Genomika Einstein                                                             | LATE - Laboratório de Técnicas Especiais - Hospital Israelita Albert Einstein    | Deyvid Amgarten, Fernanda de Mello Malta, Raquel Riyuzo, Ana Paula Moreira Salles, Pedro Henrique Sebe Rodrigues, João Bosco Oliveira Filho, João Renato Rebello Pinho                             |
| EPI_ISL_861915                                                                                                                                                                                                                                                                                                                                                                                 | LATE - Laboratório de Técnicas Especiais - Hospital Israelita Albert Einstein | LATE - Laboratório de Técnicas Especiais - Hospital Israelita Albert Einstein    | Deyvid Amgarten, Fernanda de Mello Malta, Raquel Riyuzo, Ana Paula Moreira Salles, Pedro Henrique Sebe Rodrigues, João Renato Rebello Pinho                                                        |
| EPI_ISL_871973                                                                                                                                                                                                                                                                                                                                                                                 | Hospital Universitario Severo Ochoa                                           | Instituto de Salud Carlos III                                                    | Iglesias-Caballero, M. Camarero, S. Molinero Calamita, M. González-Esguevillas, M. Pozo, F. Casas, I. Jiménez, P. Jiménez, M. Zaballos, A. Monzón, S. Varona, S. Juliá, M. Cuesta, I. García, M.L. |
| EPI_ISL_875540, EPI_ISL_875541, EPI_ISL_875542, EPI_ISL_875544, EPI_ISL_875545, EPI_ISL_875546, EPI_ISL_875547, EPI_ISL_875548, EPI_ISL_875549, EPI_ISL_875550                                                                                                                                                                                                                                 | Instituto de Biotecnologia - UNESP-Botucatu-SP                                | Instituto de Biotecnologia - UNESP-Botucatu-SP                                   | Leila Sabrina Ullmann; Fábio Sossai Possebon, Camila Dantas Malossi, Paula Rahal, Paulo Inacio da Costa, João Pessoa Araújo Jr.                                                                    |
| EPI_ISL_882657                                                                                                                                                                                                                                                                                                                                                                                 | LACEN do Estado do Piauí, Dr. Costa Alvarenga                                 | Instituto Adolfo Lutz, Interdisciplinary Procedures Center, Strategic Laboratory | Claudio Tavares Sacchi, Claudia Regina Gonçalves, Erica Valessa Ramos Gomes, Karoline Rodrigues Campos                                                                                             |
| EPI_ISL_882658                                                                                                                                                                                                                                                                                                                                                                                 | Secretaria Municipal de Saude                                                 | Instituto Adolfo Lutz, Interdisciplinary Procedures Center, Strategic Laboratory | Claudio Tavares Sacchi, Claudia Regina Gonçalves, Erica Valessa Ramos Gomes, Karoline Rodrigues Campos                                                                                             |
| EPI_ISL_882659                                                                                                                                                                                                                                                                                                                                                                                 | Centro de Triagem Covid19                                                     | Instituto Adolfo Lutz, Interdisciplinary Procedures Center, Strategic Laboratory | Claudio Tavares Sacchi, Claudia Regina Gonçalves, Erica Valessa Ramos Gomes, Karoline Rodrigues Campos                                                                                             |
| EPI_ISL_882660                                                                                                                                                                                                                                                                                                                                                                                 | Hospital Municipal Prefeito Waldemar Costa Filho                              | Instituto Adolfo Lutz, Interdisciplinary Procedures Center, Strategic Laboratory | Claudio Tavares Sacchi, Claudia Regina Gonçalves, Erica Valessa Ramos Gomes, Karoline Rodrigues Campos                                                                                             |
| EPI_ISL_882661                                                                                                                                                                                                                                                                                                                                                                                 | Hospital de Santa Barbara de Goias                                            | Instituto Adolfo Lutz, Interdisciplinary Procedures Center, Strategic Laboratory | Claudio Tavares Sacchi, Claudia Regina Gonçalves, Erica Valessa Ramos Gomes, Karoline Rodrigues Campos                                                                                             |
| EPI_ISL_882664                                                                                                                                                                                                                                                                                                                                                                                 | LACEN do Distrito Federal                                                     | Instituto Adolfo Lutz, Interdisciplinary Procedures Center, Strategic Laboratory | Claudio Tavares Sacchi, Claudia Regina Gonçalves, Erica Valessa Ramos Gomes, Karoline Rodrigues Campos                                                                                             |
| EPI_ISL_882665                                                                                                                                                                                                                                                                                                                                                                                 | Unidade de Pronto Atendimento Dra Zilda Arns                                  | Instituto Adolfo Lutz, Interdisciplinary Procedures Center, Strategic Laboratory | Claudio Tavares Sacchi, Claudia Regina Gonçalves, Erica Valessa Ramos Gomes, Karoline Rodrigues Campos                                                                                             |
| EPI_ISL_882666                                                                                                                                                                                                                                                                                                                                                                                 | UMS de Juquitiba                                                              | Instituto Adolfo Lutz, Interdisciplinary Procedures Center, Strategic Laboratory | Claudio Tavares Sacchi, Claudia Regina Gonçalves, Erica Valessa Ramos Gomes, Karoline Rodrigues Campos                                                                                             |
| EPI_ISL_882667                                                                                                                                                                                                                                                                                                                                                                                 | Hospital de Clinicas Caieiras                                                 | Instituto Adolfo Lutz, Interdisciplinary Procedures Center, Strategic Laboratory | Claudio Tavares Sacchi, Claudia Regina Gonçalves, Erica Valessa Ramos Gomes, Karoline Rodrigues Campos                                                                                             |
| EPI_ISL_882668                                                                                                                                                                                                                                                                                                                                                                                 | UMS de Juquitiba                                                              | Instituto Adolfo Lutz, Interdisciplinary Procedures Center, Strategic Laboratory | Claudio Tavares Sacchi, Claudia Regina Gonçalves, Erica Valessa Ramos Gomes, Karoline Rodrigues Campos                                                                                             |
| EPI_ISL_882669                                                                                                                                                                                                                                                                                                                                                                                 | UPA Vila Santa Catarina                                                       | Instituto Adolfo Lutz, Interdisciplinary Procedures Center, Strategic Laboratory | Claudio Tavares Sacchi, Claudia Regina Gonçalves, Erica Valessa Ramos Gomes, Karoline Rodrigues Campos                                                                                             |
| EPI_ISL_882670                                                                                                                                                                                                                                                                                                                                                                                 | Hospital Samaritano Paulista                                                  | Instituto Adolfo Lutz, Interdisciplinary Procedures Center, Strategic Laboratory | Claudio Tavares Sacchi, Claudia Regina Gonçalves, Erica Valessa Ramos Gomes, Karoline Rodrigues Campos                                                                                             |
| EPI_ISL_884249, EPI_ISL_884250                                                                                                                                                                                                                                                                                                                                                                 | LATE - Laboratório de Técnicas Especiais - Hospital Israelita Albert Einstein | LATE - Laboratório de Técnicas Especiais - Hospital Israelita Albert Einstein    | Deyvid Amgarten, Fernanda de Mello Malta, Raquel Riyuzo, Ana Paula Moreira Salles, Pedro Henrique Sebe Rodrigues, João Renato Rebello Pinho                                                        |
| EPI_ISL_888671, EPI_ISL_888672                                                                                                                                                                                                                                                                                                                                                                 | Instituto de Biotecnologia - UNESP-Botucatu-SP                                | Instituto de Biotecnologia - UNESP-Botucatu-SP                                   | Leila Sabrina Ullmann; Fábio Sossai Possebon, Camila Dantas Malossi, Paula Rahal, Paulo Inacio da Costa, João Pessoa Araújo Jr.                                                                    |
| EPI_ISL_890468                                                                                                                                                                                                                                                                                                                                                                                 | Laboratoire de santé publique du Québec                                       | Laboratoire de santé publique du Québec                                          | Sandrine Moreira, Ioannis Ragoussis, Guillaume Bourque, Jesse Shapiro, Mark Lathrop and Michel Roger on behalf of the CoVSeQ research group                                                        |

| (http://covseq.ca/researchgroup)                                                                                                                                                                                                                                                                                                                                                                                                                                                                                               |                                                                                                               |                                                                                                                                                                                                             |                                                                                                                                                                                                                                                                                                                                             |
|--------------------------------------------------------------------------------------------------------------------------------------------------------------------------------------------------------------------------------------------------------------------------------------------------------------------------------------------------------------------------------------------------------------------------------------------------------------------------------------------------------------------------------|---------------------------------------------------------------------------------------------------------------|-------------------------------------------------------------------------------------------------------------------------------------------------------------------------------------------------------------|---------------------------------------------------------------------------------------------------------------------------------------------------------------------------------------------------------------------------------------------------------------------------------------------------------------------------------------------|
| EPI_ISL_904018, EPI_ISL_904029                                                                                                                                                                                                                                                                                                                                                                                                                                                                                                 | DB Diagnosticos do Brasil                                                                                     | Laboratório de Parasitologia Médica - Instituto de Medicina Tropical - Universidade de São Paulo                                                                                                            | Brazil-UK Centre for Arbovirus Discovery Diagnosis Genomics and Epidemiology (CADDE) Genomic Network - Instituto de Medicina Tropical                                                                                                                                                                                                       |
| EPI_ISL_906065                                                                                                                                                                                                                                                                                                                                                                                                                                                                                                                 | Day Hospital de Ermelino Matarazzo                                                                            | Instituto Adolfo Lutz, Interdisciplinary Procedures Center, Strategic Laboratory                                                                                                                            | Claudio Tavares Sacchi, Claudia Regina Gonçalves, Erica Valessa Ramos Gomes, Karoline Rodrigues Campos                                                                                                                                                                                                                                      |
| EPI_ISL_906070, EPI_ISL_906072                                                                                                                                                                                                                                                                                                                                                                                                                                                                                                 | UPA Dr. Akira Tada                                                                                            | Instituto Adolfo Lutz, Interdisciplinary Procedures Center, Strategic Laboratory                                                                                                                            | Claudio Tavares Sacchi, Claudia Regina Gonçalves, Erica Valessa Ramos Gomes, Karoline Rodrigues Campos                                                                                                                                                                                                                                      |
| EPI_ISL_906073                                                                                                                                                                                                                                                                                                                                                                                                                                                                                                                 | Hospital Vila Lobos                                                                                           | Instituto Adolfo Lutz, Interdisciplinary Procedures Center, Strategic Laboratory                                                                                                                            | Claudio Tavares Sacchi, Claudia Regina Gonçalves, Erica Valessa Ramos Gomes, Karoline Rodrigues Campos                                                                                                                                                                                                                                      |
| EPI_ISL_906074                                                                                                                                                                                                                                                                                                                                                                                                                                                                                                                 | Searom Laboratorio Diagnostico                                                                                | Instituto Adolfo Lutz, Interdisciplinary Procedures Center, Strategic Laboratory                                                                                                                            | Claudio Tavares Sacchi, Claudia Regina Gonçalves, Erica Valessa Ramos Gomes, Karoline Rodrigues Campos                                                                                                                                                                                                                                      |
| EPI_ISL_918512                                                                                                                                                                                                                                                                                                                                                                                                                                                                                                                 | LACEN - Laboratório Central de Saúde Pública do Amazonas                                                      | Evandro Chagas Institute                                                                                                                                                                                    | Santos, M.C.; Silva, A.M.; Junior, W.D.C.; Barbagelata, L.S.; Ferreira, J.A.; Sousa, E.M.A.; da Silva, P.S.; Pinheiro, K.C.; L.C.; Sousa Junior, E.C.                                                                                                                                                                                       |
| EPI_ISL_918515                                                                                                                                                                                                                                                                                                                                                                                                                                                                                                                 | LACEN - Laboratório Central de Saúde Pública do Para                                                          | Evandro Chagas Institute                                                                                                                                                                                    | Santos, M.C.; Silva, A.M.; Junior, W.D.C.; Barbagelata, L.S.; Ferreira, J.A.; Sousa, E.M.A.; da Silva, P.S.; Pinheiro, K.C.; L.C.; Sousa Junior, E.C.                                                                                                                                                                                       |
| EPI_ISL_918518                                                                                                                                                                                                                                                                                                                                                                                                                                                                                                                 | Evandro Chagas Institute                                                                                      | Evandro Chagas Institute                                                                                                                                                                                    | Santos, M.C.; Silva, A.M.; Junior, W.D.C.; Barbagelata, L.S.; Ferreira, J.A.; Sousa, E.M.A.; da Silva, P.S.; Pinheiro, K.C.; L.C.; Sousa Junior, E.C.                                                                                                                                                                                       |
| EPI_ISL_918524, EPI_ISL_918525, EPI_ISL_918529                                                                                                                                                                                                                                                                                                                                                                                                                                                                                 | LACEN - Laboratório Central de Saúde Pública do Para                                                          | Evandro Chagas Institute                                                                                                                                                                                    | Santos, M.C.; Silva, A.M.; Junior, W.D.C.; Barbagelata, L.S.; Ferreira, J.A.; Sousa, E.M.A.; da Silva, P.S.; Pinheiro, K.C.; L.C.; Sousa Junior, E.C.                                                                                                                                                                                       |
| EPI_ISL_918531, EPI_ISL_918534, EPI_ISL_918535                                                                                                                                                                                                                                                                                                                                                                                                                                                                                 | LACEN - Laboratório Central de Saúde Pública do Amazonas                                                      | Evandro Chagas Institute                                                                                                                                                                                    | Santos, M.C.; Silva, A.M.; Junior, W.D.C.; Barbagelata, L.S.; Ferreira, J.A.; Sousa, E.M.A.; da Silva, P.S.; Pinheiro, K.C.; L.C.; Sousa Junior, E.C.                                                                                                                                                                                       |
| EPI_ISL_918536, EPI_ISL_918537, EPI_ISL_918538, EPI_ISL_918539, EPI_ISL_918541                                                                                                                                                                                                                                                                                                                                                                                                                                                 | LACEN - Laboratório Central de Saúde Pública do Ceara                                                         | Evandro Chagas Institute                                                                                                                                                                                    | Santos, M.C.; Silva, A.M.; Junior, W.D.C.; Barbagelata, L.S.; Ferreira, J.A.; Sousa, E.M.A.; da Silva, P.S.; Pinheiro, K.C.; L.C.; Sousa Junior, E.C.                                                                                                                                                                                       |
| EPI_ISL_918545, EPI_ISL_918546, EPI_ISL_918547, EPI_ISL_918548, EPI_ISL_918550                                                                                                                                                                                                                                                                                                                                                                                                                                                 | LACEN - Laboratório Central de Saúde Pública do Para                                                          | Evandro Chagas Institute                                                                                                                                                                                    | Santos, M.C.; Silva, A.M.; Junior, W.D.C.; Barbagelata, L.S.; Ferreira, J.A.; Sousa, E.M.A.; da Silva, P.S.; Pinheiro, K.C.; L.C.; Sousa Junior, E.C.                                                                                                                                                                                       |
| EPI_ISL_918551, EPI_ISL_918553, EPI_ISL_918554, EPI_ISL_918557, EPI_ISL_918558, EPI_ISL_918559, EPI_ISL_918561                                                                                                                                                                                                                                                                                                                                                                                                                 | LACEN - Laboratório Central de Saúde Pública do Amapa                                                         | Evandro Chagas Institute                                                                                                                                                                                    | Santos, M.C.; Silva, A.M.; Junior, W.D.C.; Barbagelata, L.S.; Ferreira, J.A.; Sousa, E.M.A.; da Silva, P.S.; Pinheiro, K.C.; L.C.; Sousa Junior, E.C.                                                                                                                                                                                       |
| EPI_ISL_925846, EPI_ISL_925916                                                                                                                                                                                                                                                                                                                                                                                                                                                                                                 | LACEN - Laboratório Central de Saúde Pública do Amazonas                                                      | Evandro Chagas Institute Virology                                                                                                                                                                           | Santos, M.C.; Silva, A.M.; Junior, W.D.C.; Barbagelata, L.S.; Ferreira, J.A.; Sousa, E.M.A.; da Silva, P.S.; Pinheiro, K.C.; L.C.; Sousa Junior, E.C.                                                                                                                                                                                       |
| EPI_ISL_930854, EPI_ISL_930855, EPI_ISL_930856, EPI_ISL_930858                                                                                                                                                                                                                                                                                                                                                                                                                                                                 | Central Laboratory of Public Health of Rio Grande do Sul (Lacen-RS)                                           | State Center for Health Surveillance of the Health Department of the State of Rio Grande do Sul (CEVS/SES-RS)                                                                                               | Barcellos R, Campos A, Dornelles C, Godinho F, Gonzalez A, Gregianini T, Molina C, Salvato R, Schaurich A,                                                                                                                                                                                                                                  |
| EPI_ISL_940608                                                                                                                                                                                                                                                                                                                                                                                                                                                                                                                 | Laboratório Sao Lucas                                                                                         | Instituto Adolfo Lutz, Interdisciplinary Procedures Center, Strategic Laboratory                                                                                                                            | Claudio Tavares Sacchi, Claudia Regina Gonçalves, Erica Valessa Ramos Gomes, Karoline Rodrigues Campos                                                                                                                                                                                                                                      |
| EPI_ISL_940609                                                                                                                                                                                                                                                                                                                                                                                                                                                                                                                 | Hospital e Maternidade Celso Pierro                                                                           | Instituto Adolfo Lutz, Interdisciplinary Procedures Center, Strategic Laboratory                                                                                                                            | Claudio Tavares Sacchi, Claudia Regina Gonçalves, Erica Valessa Ramos Gomes, Karoline Rodrigues Campos                                                                                                                                                                                                                                      |
| EPI_ISL_940613, EPI_ISL_940616, EPI_ISL_940618                                                                                                                                                                                                                                                                                                                                                                                                                                                                                 | LACEN-PI DR. Costa Alvarenga                                                                                  | Instituto Adolfo Lutz, Interdisciplinary Procedures Center, Strategic Laboratory                                                                                                                            | Claudio Tavares Sacchi, Claudia Regina Gonçalves, Erica Valessa Ramos Gomes, Karoline Rodrigues Campos                                                                                                                                                                                                                                      |
| EPI_ISL_940624                                                                                                                                                                                                                                                                                                                                                                                                                                                                                                                 | Hospital Sao Joaquim - Beneficencia Portuguesa                                                                | Instituto Adolfo Lutz, Interdisciplinary Procedures Center, Strategic Laboratory                                                                                                                            | Claudio Tavares Sacchi, Claudia Regina Gonçalves, Erica Valessa Ramos Gomes, Karoline Rodrigues Campos                                                                                                                                                                                                                                      |
| EPI_ISL_940628                                                                                                                                                                                                                                                                                                                                                                                                                                                                                                                 | Unidade Mista de Iguape                                                                                       | Instituto Adolfo Lutz, Interdisciplinary Procedures Center, Strategic Laboratory                                                                                                                            | Claudio Tavares Sacchi, Claudia Regina Gonçalves, Erica Valessa Ramos Gomes, Karoline Rodrigues Campos                                                                                                                                                                                                                                      |
| EPI_ISL_940629                                                                                                                                                                                                                                                                                                                                                                                                                                                                                                                 | Hospital Municipal Josanias Castanha Braga                                                                    | Instituto Adolfo Lutz, Interdisciplinary Procedures Center, Strategic Laboratory                                                                                                                            | Claudio Tavares Sacchi, Claudia Regina Gonçalves, Erica Valessa Ramos Gomes, Karoline Rodrigues Campos                                                                                                                                                                                                                                      |
| EPI_ISL_942374, EPI_ISL_942375                                                                                                                                                                                                                                                                                                                                                                                                                                                                                                 | Central Laboratory of Public Health of Rio Grande do Sul (Lacen-RS)                                           | State Center for Health Surveillance of the Health Department of the State of Rio Grande do Sul (CEVS/SES-RS)                                                                                               | Barcellos R, Campos A, Crescente L, Da Silva A, Dornelles C, Fonseca V, Garay L, Godinho F, Gonzalez A, Gregianini T, Molina C, Salvato R, Schaurich A                                                                                                                                                                                      |
| EPI_ISL_942395                                                                                                                                                                                                                                                                                                                                                                                                                                                                                                                 | Virginia DCLS                                                                                                 | Virginia DCLS                                                                                                                                                                                               | Virginia DCLS                                                                                                                                                                                                                                                                                                                               |
| EPI_ISL_942407, EPI_ISL_942896, EPI_ISL_942897, EPI_ISL_942898, EPI_ISL_942899, EPI_ISL_942931                                                                                                                                                                                                                                                                                                                                                                                                                                 | Central Laboratory of Public Health of Rio Grande do Sul (Lacen-RS)                                           | State Center for Health Surveillance of the Health Department of the State of Rio Grande do Sul (CEVS/SES-RS)                                                                                               | Barcellos R, Campos A, Crescente L, Da Silva A, Dornelles C, Fonseca V, Garay L, Godinho F, Gonzalez A, Gregianini T, Molina C, Salvato R, Schaurich A                                                                                                                                                                                      |
| EPI_ISL_943575, EPI_ISL_943577, EPI_ISL_943578, EPI_ISL_943579, EPI_ISL_943580, EPI_ISL_943581, EPI_ISL_943582, EPI_ISL_943583, EPI_ISL_943584, EPI_ISL_943585, EPI_ISL_943586, EPI_ISL_943587, EPI_ISL_943588, EPI_ISL_943589, EPI_ISL_943590, EPI_ISL_943591, EPI_ISL_943594, EPI_ISL_943595, EPI_ISL_943596, EPI_ISL_943597, EPI_ISL_943598, EPI_ISL_943601, EPI_ISL_943603, EPI_ISL_943604, EPI_ISL_943606, EPI_ISL_943607, EPI_ISL_943608, EPI_ISL_943609, EPI_ISL_943610, EPI_ISL_943611, EPI_ISL_943612, EPI_ISL_943613 | State Center for Health Surveillance of the Health Department of the State of Rio Grande do Sul (CEVS/SES-RS) | Aline Campos, Amanda da Silva, Anelise Schaurich, Claudia Dornelles, Cynthia Molina, Fernanda Godinho, Lara Crescente, Leticia Garay, Regina Barcellos, Richard Salvato, Tatiana Gregianini, Vagner Fonseca |                                                                                                                                                                                                                                                                                                                                             |
| see above                                                                                                                                                                                                                                                                                                                                                                                                                                                                                                                      | Central Laboratory of Public Health of Rio Grande do Sul (Lacen-RS)                                           | State Center for Health Surveillance of the Health Department of the State of Rio Grande do Sul (CEVS/SES-RS)                                                                                               | Aline Campos, Amanda da Silva, Anelise Schaurich, Claudia Dornelles, Cynthia Molina, Fernanda Godinho, Lara Crescente, Leticia Garay, Regina Barcellos, Richard Salvato, Tatiana Gregianini, Vagner Fonseca                                                                                                                                 |
| EPI_ISL_943969, EPI_ISL_943970, EPI_ISL_943972                                                                                                                                                                                                                                                                                                                                                                                                                                                                                 | Hospital Geral de Sao Paulo                                                                                   | Instituto Adolfo Lutz, Interdisciplinary Procedures Center, Strategic Laboratory                                                                                                                            | Claudio Tavares Sacchi, Claudia Regina Gonçalves, Erica Valessa Ramos Gomes, Karoline Rodrigues Campos                                                                                                                                                                                                                                      |
| EPI_ISL_943973, EPI_ISL_943974, EPI_ISL_943975, EPI_ISL_943976, EPI_ISL_943977, EPI_ISL_943978, EPI_ISL_943980, EPI_ISL_943981, EPI_ISL_943982, EPI_ISL_943983, EPI_ISL_943984, EPI_ISL_943985, EPI_ISL_943986                                                                                                                                                                                                                                                                                                                 | LACEN do Estado de Tocantins                                                                                  | Instituto Adolfo Lutz, Interdisciplinary Procedures Center, Strategic Laboratory                                                                                                                            | Claudio Tavares Sacchi, Claudia Regina Gonçalves, Erica Valessa Ramos Gomes, Karoline Rodrigues Campos                                                                                                                                                                                                                                      |
| see above                                                                                                                                                                                                                                                                                                                                                                                                                                                                                                                      | LACEN do Estado de Tocantins                                                                                  | Instituto Adolfo Lutz, Interdisciplinary Procedures Center, Strategic Laboratory                                                                                                                            | Claudio Tavares Sacchi, Claudia Regina Gonçalves, Erica Valessa Ramos Gomes, Karoline Rodrigues Campos                                                                                                                                                                                                                                      |
| EPI_ISL_943989                                                                                                                                                                                                                                                                                                                                                                                                                                                                                                                 | LACEN do Estado de Goias                                                                                      | Instituto Adolfo Lutz, Interdisciplinary Procedures Center, Strategic Laboratory                                                                                                                            | Claudio Tavares Sacchi, Claudia Regina Gonçalves, Erica Valessa Ramos Gomes, Karoline Rodrigues Campos                                                                                                                                                                                                                                      |
| EPI_ISL_943991                                                                                                                                                                                                                                                                                                                                                                                                                                                                                                                 | LACEN do Estado de Tocantins                                                                                  | Instituto Adolfo Lutz, Interdisciplinary Procedures Center, Strategic Laboratory                                                                                                                            | Claudio Tavares Sacchi, Claudia Regina Gonçalves, Erica Valessa Ramos Gomes, Karoline Rodrigues Campos                                                                                                                                                                                                                                      |
| EPI_ISL_956297                                                                                                                                                                                                                                                                                                                                                                                                                                                                                                                 | Instituto Nacional de Salud- Dirección de Redes de Laboratorios de Salud Pública                              | Instituto Nacional de Salud- Dirección de Investigación en Salud Pública                                                                                                                                    | Katherine Laiton-Donato, Diego A. Álvarez-Díaz, Carlos Franco-Muñoz, Mauricio Pacheco-Montealegre, Hector Alejandro Ruiz-Moreno, Maria T. Herrera-Sepúlveda, Diego Andrés Prada, Jhonnatan Reales-González, Sheryll Corchuelo, Julian Naizaque, Gerardo Santamaría, Magdalena Wiesner, Marthia Lucia Ospina Martínez, Marcela Mercado-Reyes |
| EPI_ISL_968080                                                                                                                                                                                                                                                                                                                                                                                                                                                                                                                 | Pandemic Response Lab - NYC                                                                                   | Pandemic Response Lab, R&D                                                                                                                                                                                  | Henry Lee, Michael Hammerling, Melissa Hopkins, Cybill del Castillo, William Ward, Pradeep Bugga, Haiping Hao, Jon Laurent                                                                                                                                                                                                                  |
| EPI_ISL_976957                                                                                                                                                                                                                                                                                                                                                                                                                                                                                                                 | Broad Institute Clinical Research Sequencing Platform                                                         | Infectious Disease Program, Broad Institute of Harvard and MIT                                                                                                                                              | Lemieux, J.E., Siddle, K.J., Adams, G., Gladden-Young, A., Lagerborg, K., Rudy, M., DeRuff, K., Carter, A., Normandin, E., Bauer, M., Reilly, S., Tomkins-Tinch, C., Loreth, C., Chaluvadi, S., Birren, B.W., Gallagher, G., Smole, S., Park, D.J., MacInnis, B.L., and Sabeti, P.C.                                                        |
| EPI_ISL_977471                                                                                                                                                                                                                                                                                                                                                                                                                                                                                                                 | Instituto Adolfo Lutz - Regional de Presidente Prudente                                                       | Instituto Adolfo Lutz, Interdisciplinary Procedures Center, Strategic Laboratory                                                                                                                            | Claudio Tavares Sacchi, Claudia Regina Gonçalves, Erica Valessa Ramos Gomes, Karoline Rodrigues Campos                                                                                                                                                                                                                                      |

|                                                                                                                                                                                                                                                                                                                |                                                                               |                                                                                                               |                                                                                                                                                                                                       |
|----------------------------------------------------------------------------------------------------------------------------------------------------------------------------------------------------------------------------------------------------------------------------------------------------------------|-------------------------------------------------------------------------------|---------------------------------------------------------------------------------------------------------------|-------------------------------------------------------------------------------------------------------------------------------------------------------------------------------------------------------|
| EPI_ISL_977472, EPI_ISL_977473, EPI_ISL_977474, EPI_ISL_977476, EPI_ISL_977477                                                                                                                                                                                                                                 | Instituto Adolfo Lutz Central                                                 | Instituto Adolfo Lutz, Interdisciplinary Procedures Center, Strategic Laboratory                              | Claudio Tavares Sacchi, Claudia Regina Gonçalves, Erica Valessa Ramos Gomes, Karoline Rodrigues Campos                                                                                                |
| EPI_ISL_977478                                                                                                                                                                                                                                                                                                 | Instituto Adolfo Lutz - Regional de Presidente Prudente                       | Instituto Adolfo Lutz, Interdisciplinary Procedures Center, Strategic Laboratory                              | Claudio Tavares Sacchi, Claudia Regina Gonçalves, Erica Valessa Ramos Gomes, Karoline Rodrigues Campos                                                                                                |
| EPI_ISL_977479                                                                                                                                                                                                                                                                                                 | Lab Loc - Itapecerica da Serra                                                | Instituto Adolfo Lutz, Interdisciplinary Procedures Center, Strategic Laboratory                              | Claudio Tavares Sacchi, Claudia Regina Gonçalves, Erica Valessa Ramos Gomes, Karoline Rodrigues Campos                                                                                                |
| EPI_ISL_977480, EPI_ISL_977481                                                                                                                                                                                                                                                                                 | Instituto Adolfo Lutz - Regional de Presidente Prudente                       | Instituto Adolfo Lutz, Interdisciplinary Procedures Center, Strategic Laboratory                              | Claudio Tavares Sacchi, Claudia Regina Gonçalves, Erica Valessa Ramos Gomes, Karoline Rodrigues Campos                                                                                                |
| EPI_ISL_977482                                                                                                                                                                                                                                                                                                 | Instituto Adolfo Lutz - Regional de Aracatuba                                 | Instituto Adolfo Lutz, Interdisciplinary Procedures Center, Strategic Laboratory                              | Claudio Tavares Sacchi, Claudia Regina Gonçalves, Erica Valessa Ramos Gomes, Karoline Rodrigues Campos                                                                                                |
| EPI_ISL_977483                                                                                                                                                                                                                                                                                                 | Instituto Adolfo Lutz Central                                                 | Instituto Adolfo Lutz, Interdisciplinary Procedures Center, Strategic Laboratory                              | Claudio Tavares Sacchi, Claudia Regina Gonçalves, Erica Valessa Ramos Gomes, Karoline Rodrigues Campos                                                                                                |
| EPI_ISL_977485                                                                                                                                                                                                                                                                                                 | Instituto Adolfo Lutz - Regional de Presidente Prudente                       | Instituto Adolfo Lutz, Interdisciplinary Procedures Center, Strategic Laboratory                              | Claudio Tavares Sacchi, Claudia Regina Gonçalves, Erica Valessa Ramos Gomes, Karoline Rodrigues Campos                                                                                                |
| EPI_ISL_977486                                                                                                                                                                                                                                                                                                 | Instituto Adolfo Lutz - Regional de Santo Andre                               | Instituto Adolfo Lutz, Interdisciplinary Procedures Center, Strategic Laboratory                              | Claudio Tavares Sacchi, Claudia Regina Gonçalves, Erica Valessa Ramos Gomes, Karoline Rodrigues Campos                                                                                                |
| EPI_ISL_977487                                                                                                                                                                                                                                                                                                 | Instituto Adolfo Lutz Central                                                 | Instituto Adolfo Lutz, Interdisciplinary Procedures Center, Strategic Laboratory                              | Claudio Tavares Sacchi, Claudia Regina Gonçalves, Erica Valessa Ramos Gomes, Karoline Rodrigues Campos                                                                                                |
| EPI_ISL_977488                                                                                                                                                                                                                                                                                                 | Instituto Adolfo Lutz - Regional de Presidente Prudente                       | Instituto Adolfo Lutz, Interdisciplinary Procedures Center, Strategic Laboratory                              | Claudio Tavares Sacchi, Claudia Regina Gonçalves, Erica Valessa Ramos Gomes, Karoline Rodrigues Campos                                                                                                |
| EPI_ISL_977489                                                                                                                                                                                                                                                                                                 | UPA Dr. Akira Tada                                                            | Instituto Adolfo Lutz, Interdisciplinary Procedures Center, Strategic Laboratory                              | Claudio Tavares Sacchi, Claudia Regina Gonçalves, Erica Valessa Ramos Gomes, Karoline Rodrigues Campos                                                                                                |
| EPI_ISL_977490                                                                                                                                                                                                                                                                                                 | Hospital Municipal Guido Guida                                                | Instituto Adolfo Lutz, Interdisciplinary Procedures Center, Strategic Laboratory                              | Claudio Tavares Sacchi, Claudia Regina Gonçalves, Erica Valessa Ramos Gomes, Karoline Rodrigues Campos                                                                                                |
| EPI_ISL_977500                                                                                                                                                                                                                                                                                                 | LATE - Laboratório de Técnicas Especiais - Hospital Israelita Albert Einstein | LATE - Laboratório de Técnicas Especiais - Hospital Israelita Albert Einstein                                 | Deyvid Amgarten, Fernanda de Mello Malta, Raquel Riyuzo, Ana Paula Moreira Salles, Pedro Henrique Sebe Rodrigues, João Renato Rebelo Pinho                                                            |
| EPI_ISL_978488, EPI_ISL_978490, EPI_ISL_978493, EPI_ISL_978494, EPI_ISL_978495, EPI_ISL_978496, EPI_ISL_978497, EPI_ISL_978498, EPI_ISL_978499, EPI_ISL_978500, EPI_ISL_978502, EPI_ISL_978504, EPI_ISL_978512, EPI_ISL_978519, EPI_ISL_978522, EPI_ISL_978524, EPI_ISL_978529, EPI_ISL_978531, EPI_ISL_978532 | see above                                                                     | Central Public Health Laboratory - LACEN -Bahia, Salvador, Brazil                                             | Stephane Tosta, Luciana Oliveira, Vanessa Nardy, Patrícia Cajado, Marcela Gómez, Breno Dominguez, Jaqueline Gomes, Vagner Fonseca, Marta Giovanetti, Luiz Alcantara, Felicidade Pereira, Arabela Leal |
| EPI_ISL_981383                                                                                                                                                                                                                                                                                                 | IAL Regional de Bauru                                                         | Instituto Adolfo Lutz, Interdisciplinary Procedures Center, Strategic Laboratory                              | Claudio Tavares Sacchi, Claudia Regina Gonçalves, Erica Valessa Ramos Gomes, Karoline Rodrigues Campos                                                                                                |
| EPI_ISL_983863, EPI_ISL_983864, EPI_ISL_983865, EPI_ISL_983866, EPI_ISL_983867, EPI_ISL_983868, EPI_ISL_983869                                                                                                                                                                                                 | Central Laboratory of Public Health of Rio Grande do Sul (Lacen-RS)           | State Center for Health Surveillance of the Health Department of the State of Rio Grande do Sul (CEVS/SES-RS) | Aline Campos, Cynthia Molina, Lara Crescente, Leticia Garay, Ludmila Fiorenzano Baethgen, Richard Salvato, Tatiana Gregianini                                                                         |
| EPI_ISL_984242                                                                                                                                                                                                                                                                                                 | Instituto Adolfo Lutz Central                                                 | Instituto Adolfo Lutz, Interdisciplinary Procedures Center, Strategic Laboratory                              | Claudio Tavares Sacchi, Claudia Regina Gonçalves, Erica Valessa Ramos Gomes, Karoline Rodrigues Campos                                                                                                |
| EPI_ISL_984243, EPI_ISL_984244                                                                                                                                                                                                                                                                                 | Instituto Adolfo Lutz - Regional de Marília                                   | Instituto Adolfo Lutz, Interdisciplinary Procedures Center, Strategic Laboratory                              | Claudio Tavares Sacchi, Claudia Regina Gonçalves, Erica Valessa Ramos Gomes, Karoline Rodrigues Campos                                                                                                |
| EPI_ISL_984245, EPI_ISL_984246                                                                                                                                                                                                                                                                                 | Instituto Adolfo Lutz Central                                                 | Instituto Adolfo Lutz, Interdisciplinary Procedures Center, Strategic Laboratory                              | Claudio Tavares Sacchi, Claudia Regina Gonçalves, Erica Valessa Ramos Gomes, Karoline Rodrigues Campos                                                                                                |
| EPI_ISL_984248, EPI_ISL_984249, EPI_ISL_984250, EPI_ISL_984251, EPI_ISL_984253, EPI_ISL_984255, EPI_ISL_984256, EPI_ISL_984259, EPI_ISL_984261, EPI_ISL_984262                                                                                                                                                 | IAL Regional de Marília                                                       | Instituto Adolfo Lutz, Interdisciplinary Procedures Center, Strategic Laboratory                              | Claudio Tavares Sacchi, Claudia Regina Gonçalves, Erica Valessa Ramos Gomes, Karoline Rodrigues Campos                                                                                                |
| EPI_ISL_984263                                                                                                                                                                                                                                                                                                 | IAL Regional de Bauru                                                         | Instituto Adolfo Lutz, Interdisciplinary Procedures Center, Strategic Laboratory                              | Claudio Tavares Sacchi, Claudia Regina Gonçalves, Erica Valessa Ramos Gomes, Karoline Rodrigues Campos                                                                                                |
| EPI_ISL_984619, EPI_ISL_984621                                                                                                                                                                                                                                                                                 | Central Laboratory of Public Health of Rio Grande do Sul (Lacen-RS)           | State Center for Health Surveillance of the Health Department of the State of Rio Grande do Sul (CEVS/SES-RS) | Aline Campos, Cynthia Molina, Lara Crescente, Leticia Garay, Ludmila Fiorenzano Baethgen, Richard Salvato, Tatiana Gregianini                                                                         |
| EPI_ISL_985170                                                                                                                                                                                                                                                                                                 | Instituto Adolfo Lutz - Regional de Presidente Prudente                       | Instituto Adolfo Lutz, Interdisciplinary Procedures Center, Strategic Laboratory                              | Claudio Tavares Sacchi, Claudia Regina Gonçalves, Erica Valessa Ramos Gomes, Karoline Rodrigues Campos                                                                                                |
| EPI_ISL_985171, EPI_ISL_985174                                                                                                                                                                                                                                                                                 | Instituto Adolfo Lutz - Regional de Taubate                                   | Instituto Adolfo Lutz, Interdisciplinary Procedures Center, Strategic Laboratory                              | Claudio Tavares Sacchi, Claudia Regina Gonçalves, Erica Valessa Ramos Gomes, Karoline Rodrigues Campos                                                                                                |
| EPI_ISL_985175, EPI_ISL_985176, EPI_ISL_985177                                                                                                                                                                                                                                                                 | Instituto Adolfo Lutz Central                                                 | Instituto Adolfo Lutz, Interdisciplinary Procedures Center, Strategic Laboratory                              | Claudio Tavares Sacchi, Claudia Regina Gonçalves, Erica Valessa Ramos Gomes, Karoline Rodrigues Campos                                                                                                |
| EPI_ISL_985178                                                                                                                                                                                                                                                                                                 | Lab Loc - Itapecerica da Serra                                                | Instituto Adolfo Lutz, Interdisciplinary Procedures Center, Strategic Laboratory                              | Claudio Tavares Sacchi, Claudia Regina Gonçalves, Erica Valessa Ramos Gomes, Karoline Rodrigues Campos                                                                                                |
